# Supplementary material for: American Society of Hematology 2023 guidelines for management of venous thromboembolism: thrombophilia testing
Source: PubMed Central journal article supplement — Blood Adv. 2023 May 24;7(22):7101–38. doi: 10.1182/bloodadvances.2023010177 (PMC10709681; doi:10.1182/bloodadvances.2023010177), 2023-05-24
Supplement: BLOODA_ADV-2023-010177-C-mmc1.pdf [file BLOODA_ADV-2023-010177-C-mmc1.pdf]

# Supplement 1: Panel and Systematic Review Team Membership

## ASH Guideline Panel on Thrombophilia Testing

### *Individuals Who Participated in Determining the Final Recommendations*

| <i>Name (Role)</i>                  | <i>Expertise or Perspective</i> | <i>Participation</i> |
|-------------------------------------|---------------------------------|----------------------|
| Saskia Middeldorp, MD, PhD (Chair)  | Internal medicine               | 2015-2022            |
| Alfonso Iorio, MD, PhD (Vice Chair) | Hematology, methodology         | 2015-2022            |
| Lisa Baumann-Kreuziger, MD, MS      | Hematology                      | 2018-2022            |
| Michiel Coppens, MD, PhD            | Internal medicine               | 2018-2022            |
| Andra James, MD, MPH                | Maternal-fetal medicine         | 2018-2022            |
| Damon Houghton, MD, MS              | Hematology                      | 2018-2022            |
| Eddy Lang, MD                       | Methodology, emergency medicine | 2015-2022            |
| Stephan Moll, MD                    | Hematology                      | 2015-2022            |
| Tarra Myers                         | Patient representative          | 2018-2022            |

### *Other Individuals \**

| <i>Name (Role)</i>     | <i>Expertise or Perspective</i> | <i>Participation</i> |
|------------------------|---------------------------------|----------------------|
| Trevor Baglin, MD      | Hematology                      | 2015-2015            |
| Danielle Barrett       | Patient representative          | 2018-2020            |
| Sara Cook              | Patient representative          | 2015-2015            |
| Mark Crowther, MD, MSc | Hematology                      | 2015-2019            |
| Beth Waldron           | Patient representative          | 2015-2018            |

\* Dr. Baglin and Ms. Cook helped prioritize questions and rate outcomes but did not participate in reviewing evidence, forming recommendations, or writing the guideline report. Dr. Crowther and Ms. Waldron helped prioritize questions, rate outcomes, review evidence, and form draft recommendations, but they did not participate in finalizing the recommendations or writing the guideline report. Ms. Barrett helped review evidence and form draft recommendations but did not participate in finalizing the recommendations or writing the guideline report.

## McMaster Systematic Review Team

| <i>Name</i>                          | <i>Participation</i> |
|--------------------------------------|----------------------|
| Robby Nieuwlaat, PhD                 | 2015-2022            |
| Holger J. Schünemann, MD, PhD        | 2015-2022            |
| Wojtek Wiercioch, PhD                | 2015-2022            |
| Meha Bhatt, MSc                      | 2018-2022            |
| Chatree Chai-Adisaksopha, MD, PhD    | 2018-2022            |
| Luis Enrique Colunga Lozano, MD, MSc | 2018-2022            |
| Samer G. Karam, MD                   | 2018-2022            |
| Yuan Zhang, PhD                      | 2018-2022            |

|                                   |           |
|-----------------------------------|-----------|
| Anne W.S. Rutjes, PhD             | 2017-2019 |
| Itziar Etxeandia-Ikobaltzeta, PhD | 2015-2017 |
| Brian Hemens, MSc                 | 2017      |
| Tejan Baldeh                      | 2016-2017 |
| Nora Ibargoyen Roteta, PhD        | 2016-2017 |
| Joseph Mussa, MSc                 | 2016-2017 |
| Victoria Zuk, MSc                 | 2016-2017 |
| Housne Begum, PhD                 | 2016      |
| Carlos Cuello Garcia, MD, PhD     | 2016      |
| Yetiani Roldan Benitez, MD        | 2016      |
