# Supplementary material for: American Society of Hematology 2023 guidelines for management of venous thromboembolism: thrombophilia testing
Source: PubMed Central journal article supplement — Blood Adv. 2023 May 24;7(22):7101–38. doi: 10.1182/bloodadvances.2023010177 (PMC10709681; doi:10.1182/bloodadvances.2023010177), 2023-05-24
Supplement: BLOODA_ADV-2023-010177-C-mmc2.pdf [file BLOODA_ADV-2023-010177-C-mmc2.pdf]

# Supplement 2. Disclosure of Interest Forms of the Panelists for the American Society of Hematology 2023 Guidelines for Management of Venous Thromboembolism: Thrombophilia Testing

Lisa Baumann-Kreuziger

Michiel Coppens

Damon Houghton

Alfonso Iorio

Andra James

Eddy Lang

Saskia Middeldorp

Stephan Moll

Tarra Myers

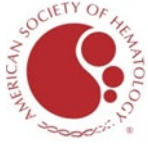

# ASH Guideline Panel Declarations of Interest Form

## Part A. Material Interests in Companies

### Equity

1. Do you currently or in the past 24 months have you had equity in any for-profit company that develops, produces, markets, or distributes drugs, devices, services, or therapies used to diagnose, treat, monitor, manage, or alleviate health conditions? Equity includes stock, stock options, and other ownership interests but excludes diversified mutual fund shares.

No

Yes, as described below:

Add rows as needed for each equity interest.

| <i>Company</i> | <i>Description</i> | <i>Date Divested</i> | <i>For ASH Internal Use</i> |
|----------------|--------------------|----------------------|-----------------------------|
|                |                    |                      |                             |
|                |                    |                      |                             |

### Patents and Royalties

2. Do you currently or in the past 24 months have you owned patents for or received royalties from any intellectual property or product used to diagnose, treat, monitor, manage, or alleviate health conditions?

No

Yes, as described below:

Add rows as needed for each patent or royalty interest.

| <i>Company</i> | <i>Description</i> | <i>Date Divested</i> | <i>For ASH Internal Use</i> |
|----------------|--------------------|----------------------|-----------------------------|
|                |                    |                      |                             |
|                |                    |                      |                             |

## Personal Income or Other Remuneration

3. Do you currently or in the past 24 months have you received personal income or other remuneration (e.g., reimbursement or financial support for the costs of travel) from any for-profit company that develops, produces, markets, or distributes drugs, devices, services, or therapies used to diagnose, treat, monitor, manage, or alleviate health conditions?

No

Yes, as described below:

Column 1 Name the company.

Column 2 Describe the activity for which you received income or other remuneration, e.g., employment, consultancy, speakers bureau involvement, service on an advisory committee or board, expert testimony.

Column 3 Indicate when the activity ended, if applicable. (If the activity has not yet ended, indicate "current" or "ongoing.")

Add rows as needed for each activity.

To report activities that generate revenues for your institution, see Part B, Question 4.

| <i>Company</i> | <i>Description</i> | <i>End Date</i> | <i>For ASH Internal Use</i> |
|----------------|--------------------|-----------------|-----------------------------|
|                |                    |                 |                             |
|                |                    |                 |                             |
|                |                    |                 |                             |

## Industry-Funded Research

4. Do you currently or in the past 24 months have you been involved in research funded or supported (e.g., in kind support) by any for-profit company that develops, produces, markets, or distributes drugs, devices, services, or therapies used to diagnose, treat, monitor, manage, or alleviate health conditions?

No

Yes, as described below:

Column 1 Name the company funding or supporting the research.

Column 2 Briefly describe the research project. Indicate if funding or support goes to you directly or to your institution.

Column 3 Describe your role: (a) national or overall principal investigator, (b) member of a steering committee of a study that does not have a principal investigator, (c) site or local investigator. If other than these options, please describe.

Column 4 Indicate when your involvement ended, if applicable. (If your involvement has not yet ended, indicate “current” or “ongoing.”)

Add rows as needed for each research project.

| <i>Company</i> | <i>Description of Research</i>                                         | <i>My Role</i> | <i>End Date</i> | <i>For ASH Internal Use</i>             |
|----------------|------------------------------------------------------------------------|----------------|-----------------|-----------------------------------------|
| Daiichi Sankyo | Randomized clinical trial of venous thromboembolism in cancer patients | Site-PI        | 12/31/17        | This activity ended before appointment. |
|                |                                                                        |                |                 |                                         |
|                |                                                                        |                |                 |                                         |
|                |                                                                        |                |                 |                                         |

### My Partner’s or Spouse’s Interests

5. Currently or in the past 24 months has *your partner or spouse* had any of the interests described in questions 1-4?

No

Yes, as described below:

Add rows as needed for each interest.

| <i>Company</i> | <i>Description</i> | <i>End Date</i> | <i>For ASH Internal Use</i> |
|----------------|--------------------|-----------------|-----------------------------|
|                |                    |                 |                             |
|                |                    |                 |                             |
|                |                    |                 |                             |

## Part B. Interests That Are Not Mainly Financial

You have been invited by ASH to participate in the development of clinical practice guidelines on the following topic(s):

Thrombophilia Guideline Panel

The questions that follow are designed to elicit information about personal beliefs, intellectual positions or opinions, institutional relationships, and other interests that are not mainly financial and that may be relevant to guidelines on the above topic(s).

### Personal Beliefs

1. Do you have strongly held beliefs related to the topic of these guidelines?

No

Yes

If yes, please explain:

### Previously Published Opinions

2. Have you ever authored, coauthored, or publicly provided an opinion related to the topic of these guidelines, e.g., a clinical practice guideline, textbook, review article, meeting poster or presentation, grand rounds talk, letter to the editor?

No

Yes

If yes, what were those views and where were they made?

### Research

3. Currently or in the past 24 months, have you been involved in a leadership role in any research project not already reported under Part A, Question 4, relevant to the topic of these guidelines, e.g., a research project funded by a nonprofit or governmental organization?

No

Yes, as described below:

Column 1 Name the entity funding the research.

Column 2 Describe the research project.

Column 3 Describe your role: (a) national or overall principal investigator, (b) member of a steering committee of a study that does not have a principal investigator, (c) site or local investigator. If other than these options, please describe.

Column 4 Indicate when your involvement ended, if applicable. (If your involvement has not yet ended, indicate "current" or "ongoing.")

Add rows as needed for each research project.

| <i>Funder</i> | <i>Description of Research</i> | <i>My Role</i> | <i>End Date</i> |
|---------------|--------------------------------|----------------|-----------------|
|               |                                |                |                 |
|               |                                |                |                 |
|               |                                |                |                 |
|               |                                |                |                 |

## Institutional Relationships

4. Do you generate revenues or nonfinancial benefits for your institution by teaching, speaking, consulting, testifying, writing, or otherwise sharing your knowledge or opinions about this guideline topic?

Don't know

No

Yes

If yes, please explain:

5. Could your institution benefit or be harmed by recommendations of guidelines on this topic?

Don't know

No

Yes

If yes, please explain:

BloodCenter of Wisconsin performs clinical diagnostic testing for many areas including thrombophilia.

## Career Advancement

6. How would you characterize the support you would receive from your primary mentor, institution, or other entities if your work on this panel or authorship of these guidelines generated a strong reaction from peers outside your institution?

Strong support for me to work on this guideline.

## Advocacy and Policy Positions

7. Do you work for or are you a member of an organization with a stated position related to the topic of these guidelines, e.g., position statement, editorial, blog, amicus brief, or legislature or legal testimony?

No

Yes

If yes, are you involved in formulating or voting for positions?

No

Yes

If yes, could recommendations of these guidelines conflict with policies you have promoted or are obligated to follow?

Don't know or not applicable

No

Yes

If yes, please explain:

## Professional Specialty

8. What is your primary clinical specialty or subspecialty?

Adult Benign Hematology

9. Do you prescribe or otherwise recommend diagnostic tests or treatments that may be addressed by these guidelines?

No

Yes

If yes, please explain:

I perform consultations to determine if thrombophilia testing is needed.

### Expected Interests

10. Do you expect new financial or nonfinancial interests relevant to the topic of these guidelines not already declared in Part A or Part B of this form?

No

Yes

If yes, please describe:



## Part C. Summary (ASH Internal Use)

ASH will review your disclosures and summarize here interests that are judged to be current, material, and with an affected company. You will then be invited to review our determinations and to agree to make all parts of this form (A, B and C) publicly available.

|                            |                                  |
|----------------------------|----------------------------------|
| Name of guideline panel(s) | Guideline Panel on Thrombophilia |
|----------------------------|----------------------------------|

| <i>Approved to participate?</i> | <i>Status</i>         | <i>Recusal may be required?</i> | <i>Reviewer Name and Date</i> | <i>Notes</i>                                                                                             |
|---------------------------------|-----------------------|---------------------------------|-------------------------------|----------------------------------------------------------------------------------------------------------|
| Yes                             | Unconflicted majority | No                              | 11/26/2018<br>Alexander       | Dr. Baumann Kreuziger does not have any current financial conflicts of interest.                         |
| Yes                             | Unconflicted majority | No                              | 3/22/2019                     | New disclosures, see Part D. On 3/21/2019, Dr. Baumann Kreuziger confirmed all information in this form. |
| Yes                             | Unconflicted majority | No                              | 1/10/2020                     | New disclosures, See Part D.                                                                             |
| Yes                             | Unconflicted majority | No                              | 5/8/2020<br>Alexander         | On 5/8/2020, Dr. Baumann Kreuziger confirmed all information in this form.                               |
| Yes                             | Unconflicted majority |                                 | 3/10/2022<br>Alexander        | New disclosures. See Part D.                                                                             |

If status is conflicted minority, summarize all current material interests in affected companies:

| <i>Company</i> | <i>Description</i> | <i>Disclosure Date</i> | <i>ASH Notes</i> |
|----------------|--------------------|------------------------|------------------|
|                |                    |                        |                  |
|                |                    |                        |                  |
|                |                    |                        |                  |
|                |                    |                        |                  |

Notes:

Dr. Baumann Kreuziger is an adult benign hematologist and provides clinical consultations to determine if thrombophilia testing is needed.

## Part D. New Declarations

The following interests were disclosed after appointment:

| <i>Company</i>            | <i>Description</i>                                                                                                                                                                                                             | <i>Disclosure Date</i> | <i>ASH Internal Notes</i>                                                                                                                                                                |
|---------------------------|--------------------------------------------------------------------------------------------------------------------------------------------------------------------------------------------------------------------------------|------------------------|------------------------------------------------------------------------------------------------------------------------------------------------------------------------------------------|
| ACCP                      | Dr. Baumann discloses participating on the current ACCP VTE guidelines panel.                                                                                                                                                  | 3/22/2019              | <b>Not a COI.</b> Dr. Baumann confirmed that the scope of the ACCP guidelines does not overlap with the scope of these guidelines on Thrombophilia.                                      |
| Quercegen Pharmaceuticals | I have been asked to participate in a protocol writing committee by Jeff Zwicker that will be sponsored by Quercegen Pharmaceuticals. This is for a phase 3 trial of quercegen for prevention of cancer associated thrombosis. | 1/10/2020              | Not a COI. Quercegen Pharmaceuticals is testing quercetin for prevention of cancer associated thrombosis. However, these guidelines will not address the use of specific anticoagulants. |
| CSL Behring Advisory      | Direct payment for participation in an advisory board.                                                                                                                                                                         | 1/10/2020              | Not a COI. CSL Behring markets kcentra (a warfarin reversal agent); however, these guidelines on thrombophilia will not address use of specific anticoagulants.                          |
| N/A                       | Dr. Baumann discloses participating on the NIH COVID-19 guideline panel.                                                                                                                                                       | 5/22/2020              | Not a COI. Dr. Baumann confirmed that the scope of the NIH guidelines does not overlap with the scope of these guidelines on thrombophilia.                                              |
| N/A                       | Blood Center of Wisconsin is now called Versiti                                                                                                                                                                                | 3/3/2022               | Not a COI. This is an update to Dr. Baumann Kreuziger's employer.                                                                                                                        |

| <i>Company</i>                           | <i>Description</i>                                                                                                                                                | <i>Disclosure Date</i> | <i>ASH Internal Notes</i>                                                                                                                                                       |
|------------------------------------------|-------------------------------------------------------------------------------------------------------------------------------------------------------------------|------------------------|---------------------------------------------------------------------------------------------------------------------------------------------------------------------------------|
| NIH                                      | Funding for ACTIV-4a, ACTIV-4b, ACTIV-4c trials of anticoagulation in patients with COVID-19. All funds are paid directly to Dr. Baumann Kreuziger's institution. | 3/3/2022               | Not a COI. The NIH does not produce or market any products used for the testing of thrombophilia. This subject of the trial is unrelated to the guideline topic.                |
| HRSA Vaccine Injury Compensation Program | Direct payment for consulting.                                                                                                                                    | 3/3/2022               | Not a COI. HRSA does not produce or market any products used for the testing of thrombophilia.                                                                                  |
| American Society of Hematology           | Educational grant from the Moore foundation to develop a VTE metric diagnosis of PE. The grant was paid directly to Dr. Baumann Kreuziger's institution.          | 3/3/2022               | Not a COI. ASH is a not-for-profit organization and does not produce or market any products used for the testing of thrombophilia.                                              |
| NIH                                      | Funding for the Recipient epidemiology and donor evaluation study-IV-P (REDS-IV-P).                                                                               | 3/3/2022               | Not a COI. The NIH does not produce or market any products used for the testing of thrombophilia. This subject of the study is unrelated to the guideline topic.                |
| Northwestern University                  | Funding for a retrospective study of direct oral anticoagulants in patients at extremes of weight. All funds paid to Dr. Baumann Kreuziger's institution.         | 3/3/2022               | Not a COI. Northwestern University does not produce or market any products used for the testing of thrombophilia. The subject of the study is unrelated to the guideline topic. |



# ASH Guideline Panel Declarations of Interest Form

## Part A. Material Interests in Companies

### Equity

1. Do you currently or in the past 24 months have you had equity in any for-profit company that develops, produces, markets, or distributes drugs, devices, services, or therapies used to diagnose, treat, monitor, manage, or alleviate health conditions? Equity includes stock, stock options, and other ownership interests but excludes diversified mutual fund shares.

No

Yes, as described below:

Add rows as needed for each equity interest.

| <i>Company</i> | <i>Description</i> | <i>Date Divested</i> | <i>For ASH Internal Use</i> |
|----------------|--------------------|----------------------|-----------------------------|
|                |                    |                      |                             |
|                |                    |                      |                             |
|                |                    |                      |                             |
|                |                    |                      |                             |

### Patents and Royalties

2. Do you currently or in the past 24 months have you owned patents for or received royalties from any intellectual property or product used to diagnose, treat, monitor, manage, or alleviate health conditions?

No

Yes, as described below:

Add rows as needed for each patent or royalty interest.

| <i>Company</i> | <i>Description</i> | <i>Date Divested</i> | <i>For ASH Internal Use</i> |
|----------------|--------------------|----------------------|-----------------------------|
|                |                    |                      |                             |
|                |                    |                      |                             |
|                |                    |                      |                             |
|                |                    |                      |                             |

### Personal Income or Other Remuneration

3. Do you currently or in the past 24 months have you received personal income or other remuneration (e.g., reimbursement or financial support for the costs of travel) from any for-profit company that develops, produces, markets, or distributes drugs, devices, services, or therapies used to diagnose, treat, monitor, manage, or alleviate health conditions?

No

Yes, as described below:

Column 1 Name the company.

Column 2 Describe the activity for which you received income or other remuneration, e.g., employment, consultancy, speakers bureau involvement, service on an advisory committee or board, expert testimony.

Column 3 Indicate when the activity ended, if applicable. (If the activity has not yet ended, indicate “current” or “ongoing.”)

Add rows as needed for each activity.

To report activities that generate revenues for your institution, see Part B, Question 4.

| <i>Company</i> | <i>Description</i> | <i>End Date</i> | <i>For ASH Internal Use</i> |
|----------------|--------------------|-----------------|-----------------------------|
|                |                    |                 |                             |
|                |                    |                 |                             |
|                |                    |                 |                             |
|                |                    |                 |                             |
|                |                    |                 |                             |
|                |                    |                 |                             |
|                |                    |                 |                             |
|                |                    |                 |                             |

## Industry-Funded Research

4. Do you currently or in the past 24 months have you been involved in research funded or supported (e.g., in kind support) by any for-profit company that develops, produces, markets, or distributes drugs, devices, services, or therapies used to diagnose, treat, monitor, manage, or alleviate health conditions?

No

Yes, as described below:

Column 1 Name the company funding or supporting the research.

Column 2 Briefly describe the research project. Indicate if funding or support goes to you directly or to your institution.

Column 3 Describe your role: (a) national or overall principal investigator, (b) member of a steering committee of a study that does not have a principal investigator, (c) site or local investigator. If other than these options, please describe.

Column 4 Indicate when your involvement ended, if applicable. (If your involvement has not yet ended, indicate “current” or “ongoing.”)

Add rows as needed for each research project.

| <i>Company</i>       | <i>Description of Research</i>                                                                                                  | <i>My Role</i>    | <i>End Date</i> | <i>For ASH Internal Use</i>                                                                                                                                                                                                                      |
|----------------------|---------------------------------------------------------------------------------------------------------------------------------|-------------------|-----------------|--------------------------------------------------------------------------------------------------------------------------------------------------------------------------------------------------------------------------------------------------|
| Daiichi Sankyo       | Registry of bleeding complications in patients treated with direct oral anticoagulants (DOACs)                                  | Site investigator | current         | No COI. Daiichi Sankyo markets edoxaban; however, these guidelines on thrombophilia are not expected to include recommendations about use of specific anticoagulants. Furthermore, Dr. Coppens does not have a leadership role in this registry. |
| Sanquin Blood Supply | Efficacy and safety of 4 factor prothrombin complex concentrate as a reversal agent for bleeding in patients treated with DOACs | Site investigator | current         | No COI. Sanquin offers diagnostic services, including for blood coagulation and thrombosis. The guidelines may make recommendations about testing;                                                                                               |

| <i>Company</i>       | <i>Description of Research</i>                                                            | <i>My Role</i>   | <i>End Date</i> | <i>For ASH Internal Use</i>                                                                                                                                                                                                                                                                                                |
|----------------------|-------------------------------------------------------------------------------------------|------------------|-----------------|----------------------------------------------------------------------------------------------------------------------------------------------------------------------------------------------------------------------------------------------------------------------------------------------------------------------------|
|                      |                                                                                           |                  |                 | however, the subject of this research is unrelated to testing, and Dr. Coppens does not have a leadership role.                                                                                                                                                                                                            |
| Boehringer Ingelheim | Registration (phase 3) trial of idarucizumab as a reversal agent for dabigatran etexilate | Sub-investigator | current         | No COI. Boehringer Ingelheim markets dabigatran; however, these guidelines on thrombophilia are not expected to address use of specific anticoagulants. Furthermore, the subject of this research (reversal of anticoagulation) is also unrelated to the guideline topic, and Dr. Coppens does not have a leadership role. |
|                      |                                                                                           |                  |                 |                                                                                                                                                                                                                                                                                                                            |
|                      |                                                                                           |                  |                 |                                                                                                                                                                                                                                                                                                                            |
|                      |                                                                                           |                  |                 |                                                                                                                                                                                                                                                                                                                            |

### My Partner's or Spouse's Interests

5. Currently or in the past 24 months has *your partner or spouse* had any of the interests described in questions 1-4?

No

Yes, as described below:

Add rows as needed for each interest.

| <i>Company</i> | <i>Description</i> | <i>End Date</i> | <i>For ASH Internal Use</i> |
|----------------|--------------------|-----------------|-----------------------------|
|                |                    |                 |                             |
|                |                    |                 |                             |

| <i>Company</i> | <i>Description</i> | <i>End Date</i> | <i>For ASH Internal Use</i> |
|----------------|--------------------|-----------------|-----------------------------|
|                |                    |                 |                             |



## Part B. Interests That Are Not Mainly Financial

You have been invited by ASH to participate in the development of clinical practice guidelines on the following topic(s):

Thrombophilia

The questions that follow are designed to elicit information about personal beliefs, intellectual positions or opinions, institutional relationships, and other interests that are not mainly financial and that may be relevant to guidelines on the above topic(s).

### Personal Beliefs

1. Do you have strongly held beliefs related to the topic of these guidelines?

No

Yes

If yes, please explain:

### Previously Published Opinions

2. Have you ever authored, coauthored, or publicly provided an opinion related to the topic of these guidelines, e.g., a clinical practice guideline, textbook, review article, meeting poster or presentation, grand rounds talk, letter to the editor?

No

Yes

If yes, what were those views and where were they made?

I have co-authored (with professor Middeldorp) a chapter on Hereditary Thrombophilia for the upcoming 9th edition of Williams Hematology, an authoritative textbook in Hematology. In this chapter, we present the view that thrombophilia testing is performed often in many clinical circumstances but the necessary consequences of those tests are insufficiently known to warrant such widespread testing.

A similar opinion is found in four papers which I have (co-)authored:

1. Middeldorp S, Coppens M. Evolution of thrombophilia testing. Hematology Education: the education programme for the annual congress of the European Hematology Association 2013;7(1):375-82
2. Coppens M, Reijnders JH, Middeldorp S, Doggen CJM, Rosendaal FR. Testing for inherited thrombophilia does not reduce recurrence of venous thrombosis. Journal of Thrombosis and Haemostasis 2008;6(9):1474-7
3. Coppens M, Van Mourik JA, Eckmann CM, Büller HR, Middeldorp S. Current practise of testing for inherited thrombophilia. Journal of Thrombosis and Haemostasis 2007;5(9):1979-81
4. Coppens M, Kaandorp SP, Middeldorp S. Inherited thrombophilias. Obstetrics and Gynecology Clinics of North America 2006;33(3):357-74

## Research

3. Currently or in the past 24 months, have you been involved in a leadership role in any research project not already reported under Part A, Question 4, relevant to the topic of these guidelines, e.g., a research project funded by a nonprofit or governmental organization?

No

Yes, as described below:

Column 1 Name the entity funding the research.

Column 2 Describe the research project.

Column 3 Describe your role: (a) national or overall principal investigator, (b) member of a steering committee of a study that does not have a principal investigator, (c) site or local investigator. If other than these options, please describe.

Column 4 Indicate when your involvement ended, if applicable. (If your involvement has not yet ended, indicate “current” or “ongoing.”)

Add rows as needed for each research project.

| <i>Funder</i> | <i>Description of Research</i> | <i>My Role</i> | <i>End Date</i> |
|---------------|--------------------------------|----------------|-----------------|
|               |                                |                |                 |
|               |                                |                |                 |
|               |                                |                |                 |
|               |                                |                |                 |

## Institutional Relationships

4. Do you generate revenues or nonfinancial benefits for your institution by teaching, speaking, consulting, testifying, writing, or otherwise sharing your knowledge or opinions about this guideline topic?

Don't know

No

Yes

If yes, please explain:

5. Could your institution benefit or be harmed by recommendations of guidelines on this topic?

Don't know

No

Yes

If yes, please explain:

## Career Advancement

6. How would you characterize the support you would receive from your primary mentor, institution, or other entities if your work on this panel or authorship of these guidelines generated a strong reaction from peers outside your institution?

I expect full support from my mentor and institution; Dr. Middeldorp, chair of this guideline, is part of my institution.

## Advocacy and Policy Positions

7. Do you work for or are you a member of an organization with a stated position related to the topic of these guidelines, e.g., position statement, editorial, blog, amicus brief, or legislature or legal testimony?

No

Yes

If yes, are you involved in formulating or voting for positions?

No

Yes

If yes, could recommendations of these guidelines conflict with policies you have promoted or are obligated to follow?

Don't know or not applicable

No

Yes

If yes, please explain:

## Professional Specialty

8. What is your primary clinical specialty or subspecialty?

I am an internist vascular medicine with an emphasis on thrombosis as well as bleeding disorders.

9. Do you prescribe or otherwise recommend diagnostic tests or treatments that may be addressed by these guidelines?

No

Yes

If yes, please explain:

Ordering thrombophilia tests is regularly considered in my patients who have had any form of thrombosis.

## Expected Interests

10. Do you expect new financial or nonfinancial interests relevant to the topic of these guidelines not already declared in Part A or Part B of this form?

No

Yes

If yes, please describe:

## Part C. Summary (ASH Internal Use)

ASH will review your disclosures and summarize here interests that are judged to be current, material, and with an affected company. You will then be invited to review our determinations and to agree to make all parts of this form (A, B and C) publically available.

|                            |               |
|----------------------------|---------------|
| Name of guideline panel(s) | Thrombophilia |
|----------------------------|---------------|

| <i>Approved to participate?</i> | <i>Status</i>         | <i>Recusal may be required?</i> | <i>Reviewer name and date</i>          | <i>Notes</i>                                                                                |
|---------------------------------|-----------------------|---------------------------------|----------------------------------------|---------------------------------------------------------------------------------------------|
| Yes                             | Unconflicted majority | No                              | 4/20/15; 4/26/15                       |                                                                                             |
| Yes                             | Unconflicted majority | No                              | 10/13/16 Alexander;<br>10/26/16 Kunkle | New financial disclosures. See Part D.                                                      |
| Yes                             | Unconflicted majority | No                              | 03/20/2017 Alexander; 3/24/17 Kunkle   | New disclosure. See Part D.                                                                 |
| Yes                             | Unconflicted majority | No                              | 5/22/2020 Alexander                    | New disclosures. See Part D.                                                                |
| Yes                             | Unconflicted majority | No                              | 3/3/2022 Alexander                     | On 3/3/2022, Dr. Coppens confirmed all information in this form.                            |
| Yes                             | Unconflicted majority | No                              | 11/29/2022 Kunkle                      | New disclosures. See Part D. Dr. Coppens also confirmed all other information in this form. |

If status is conflicted minority, summarize all current material interests in affected companies:

| <i>Company</i> | <i>Description</i> | <i>Disclosure Date</i> | <i>ASH Notes</i> |
|----------------|--------------------|------------------------|------------------|
|                |                    |                        |                  |
|                |                    |                        |                  |

Notes:

|  |
|--|
|  |
|--|

## Part D. New Declarations

The following interests were disclosed after appointment:

| <i>Company</i>       | <i>Description</i>                                                                                                    | <i>Disclosure Date</i> | <i>ASH Internal Notes</i>                                                                                                                                                                     |
|----------------------|-----------------------------------------------------------------------------------------------------------------------|------------------------|-----------------------------------------------------------------------------------------------------------------------------------------------------------------------------------------------|
| CSL Behring          | 50% compensation for travel, hotel accommodations and registration for July 2015 ISTH Congress                        | 9/27/16                | No COI. CSL Behring markets Kcentra (a warfarin reversal agent); however, these guidelines on thrombophilia are not expected to include recommendations about use of specific anticoagulants. |
| Bayer                | 50% compensation for travel, hotel accommodations and registration for July 2016 World Federation Hemophilia Congress | 9/27/16                | No COI. Bayer markets rivaroxaban; however, these guidelines on thrombophilia are not expected to include recommendations about use of specific anticoagulants.                               |
| Bayer                | 50% compensation for travel, hotel accommodations and registration for October 2016 Bayer Hematology Conference       | 9/27/16                | No COI. Bayer markets rivaroxaban; however, these guidelines on thrombophilia are not expected to include recommendations about use of specific anticoagulants.                               |
| Boehringer Ingelheim | Sub investigator for registration (phase 3) trial of idarucizumab as a reversal agent for dabigatran etexilate        | 3/17/17                | By email, Dr. Coppens reported that this study has ended. As described under Part A, Question 4, this research was not considered a conflict for these guidelines.                            |
| UniQure              | Phase I/II study with AAV5-hFIX in patients with severe hemophilia<br>B. Local investigator                           | 5/22/20                | Not a COI. UniQure does not market any products used in the diagnosis or treatment of VTE. Additionally,                                                                                      |

| <i>Company</i> | <i>Description</i>                                                                                               | <i>Disclosure Date</i> | <i>ASH Internal Notes</i>                                                                                                                                                                        |
|----------------|------------------------------------------------------------------------------------------------------------------|------------------------|--------------------------------------------------------------------------------------------------------------------------------------------------------------------------------------------------|
|                | and member of publication committee                                                                              |                        | the subject of the research is unrelated to the guideline topic, Dr. Coppens does not have a leadership role, and all funding goes to his institution.                                           |
| Portola        | Travel and accommodation support for attending 2019 ASH annual meeting                                           | 5/13/2020              | Not a COI. Portola markets betrixaban and andexanet alfa; however, these guidelines will not address use of specific anticoagulants.                                                             |
| Portola        | Direct payment for advisory board participation. Subject: reversal of direct factor Xa inhibitors. Oct 2018.     | 5/13/2020              | Not a COI. Portola markets betrixaban and andexanet alfa; however, these guidelines will not address use of specific anticoagulants.                                                             |
| CSL Behring    | Direct payment for consulting. Travel and accommodation support for advisory board on hemophilia. December 2019. | 5/13/2020              | No COI. CSL Behring markets Kcentra (a warfarin reversal agent); however, these guidelines on thrombophilia are not expected to include recommendations about use of specific anticoagulants.    |
| CSL Behring    | Direct payment for speaking. Travel and accommodation support. May 2018                                          | 5/13/2020              | Not a COI. CSL Behring markets Kcentra (a warfarin reversal agent); however, these guidelines on thrombophilia are not expected to include recommendations about use of specific anticoagulants. |
| Sobi           | Direct payment for being judge on a grant                                                                        | 5/13/2020              | Not a COI. Sobi does not market any                                                                                                                                                              |

| <i>Company</i> | <i>Description</i>                                                                                                                                                      | <i>Disclosure Date</i> | <i>ASH Internal Notes</i>                                                                                                                                                                         |
|----------------|-------------------------------------------------------------------------------------------------------------------------------------------------------------------------|------------------------|---------------------------------------------------------------------------------------------------------------------------------------------------------------------------------------------------|
|                | proposal jury (once yearly from Nov 2018 onwards, ongoing)                                                                                                              |                        | products or devices used in the diagnosis or treatment of VTE.                                                                                                                                    |
| NovoNordisk    | Consultancy fee and travel support for Adboard on hemophilia (Sep 2019)                                                                                                 | 5/13/2020              | Not a COI. NovoNordisk markets Novoseven, which is used off label to reverse anticoagulants; however, these guidelines will not include recommendations about the use of specific anticoagulants. |
| Pfizer         | Fees for educational material on bleeding risk of anticoagulants with general practitioners (Aug 2019)                                                                  | 5/13/2020              | Not a COI. Pfizer markets apixaban; however, these guidelines will not include recommendations about the use of specific anticoagulants.                                                          |
| Bayer          | Lecturing fee on anticoagulation for arterial cardiovascular disease. Four different events for Dutch HCPs since April 2019.                                            | 5/13/2020              | Not a COI. Bayer markets rivaroxaban; however, these guidelines will not include recommendations about the use of specific anticoagulants.                                                        |
| Daiichi Sankyo | Consultancy fee for Steering Committee membership for ETNA-VTE Europe, as well as fee for adjudication committee work (from 2016 onwards, meeting once a year, ongoing) | 5/13/2020              | Not a COI. Daiichi Sankyo markets edoxaban; however, these guidelines will not include recommendations about the use of specific anticoagulants.                                                  |
| Alexion        | Lecturing fees on ESOC Satellite symposium 2022 and for internal                                                                                                        | 11/22/2022             | Not a COI. Alexion does not market any products for                                                                                                                                               |



| <i>Company</i>       | <i>Description</i>                                                                                                                                                 | <i>Disclosure Date</i> | <i>ASH Internal Notes</i>                                                                                                                                                                                          |
|----------------------|--------------------------------------------------------------------------------------------------------------------------------------------------------------------|------------------------|--------------------------------------------------------------------------------------------------------------------------------------------------------------------------------------------------------------------|
|                      | Alexion purposes. All occurred during 2022.                                                                                                                        |                        | thrombophilia testing or VTE treatment.                                                                                                                                                                            |
| CSL Behring          | Lecturing and consultancy fees on AAV gene therapy for haemophilia. Multiple initiatives. Ongoing.                                                                 | 11/22/2022             | Not a COI. CSL Behring markets Kcentra (a warfarin reversal agent); however, these guidelines on thrombophilia are not expected to include recommendations about use of specific anticoagulants or about reversal. |
| Daiichi Sankyo       | Member of steering committee ETNA-VTE. Payment for time attending meetings and reimbursement travel cost for being there. Ongoing, once per year meeting.          | 11/22/2022             | Not a COI. Daiichi Sankyo markets edoxaban; however, these guidelines will not include recommendations about the use of specific anticoagulants.                                                                   |
| Sobi                 | Jury member for award for small investigator initiated studies in the field of haemophilia and allied bleeding disorders in the Netherlands. Ongoing, once yearly. | 11/22/2022             | Not a COI. Sobi does not market any products for thrombophilia testing or VTE treatment.                                                                                                                           |
| Viartis              | Paid participation in advisory board on low-molecular weight heparin. One time in 2022.                                                                            | 11/22/2022             | Not a COI. Viartis does not market any products for thrombophilia testing or VTE treatment.                                                                                                                        |
| Daiichi Sankyo       | The registry project described in Part A, Question 4, of this form ended >2 years ago.                                                                             | 11/22/2022             |                                                                                                                                                                                                                    |
| Sanquin Blood Supply | The research project described in Part A, Question 4, of this form ended >2 years ago.                                                                             | 11/22/2022             |                                                                                                                                                                                                                    |

| <i>Company</i>       | <i>Description</i>                                                                             | <i>Disclosure Date</i> | <i>ASH Internal Notes</i>                                                                                                                                                                                    |
|----------------------|------------------------------------------------------------------------------------------------|------------------------|--------------------------------------------------------------------------------------------------------------------------------------------------------------------------------------------------------------|
| Boehringer Ingelheim | The phase 3 trial described in Part A, Question 4, of this form ended >2 years ago.            | 11/22/2022             |                                                                                                                                                                                                              |
| Anthos Therapeutics  | Phase 3 studies of abelacimab for treatment of cancer associated VTE. Role: Center-PI.         | 11/22/2022             | Not a COI. Abelacimab is not yet to market. Anthos has no other products.                                                                                                                                    |
| Novo Nordisk         | Frontier-2 study (Mim-8 for treatment of patients with severe haemophilia A). Role: Center-PI. | 11/22/2022             | Not a COI. Novo Nordisk markets Novoseven, which is used off label to reverse anticoagulants; however, these guidelines will not include recommendations about the use of specific anticoagulants.           |
| Roche                | HAVEN-6 study (emicizumab for non-severe haemophilia A.) Role: Center-PI                       | 11/22/2022             | Not a COI. Roche markets thrombophilia testing products. Dr. Coppens has a leadership role in research funded by this company. However, the subject of the research is unrelated to those products.          |
| CSL Behring          | Phase 3 study on gene therapy for haemophilia B. Role: Local PI, co-author on main publication | 11/22/2022             | Not a COI. CSL Behring markets Kcentra (a warfarin reversal agent); however, these guidelines on thrombophilia are not expected to include recommendations about use of specific anticoagulants or reversal. |
| UniQure              | See CSL Behring. Study was initiated by                                                        | 11/22/2022             | Not a COI. See CSL Behring above.                                                                                                                                                                            |

| <i>Company</i> | <i>Description</i>                                                                                                                                        | <i>Disclosure Date</i> | <i>ASH Internal Notes</i>                                                                                                                        |
|----------------|-----------------------------------------------------------------------------------------------------------------------------------------------------------|------------------------|--------------------------------------------------------------------------------------------------------------------------------------------------|
|                | UniQure and this product including the study oversight has been taken over by CSL Behring                                                                 |                        |                                                                                                                                                  |
| Daiichi Sankyo | ETNA-VTE Europe (phase 4 study on edoxaban for VTE).<br>Role: member of the steering committee                                                            | 11/22/2022             | Not a COI. Daiichi Sankyo markets edoxaban; however, these guidelines will not include recommendations about the use of specific anticoagulants. |
|                | Dr. Coppens notes that he is no longer at the same institution as the guideline panel chair Dr. Middeldorp, as previously reported in Part B, Question 6. | 11/22/2022             |                                                                                                                                                  |

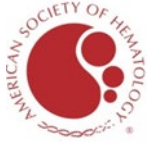

# ASH Guideline Panel Declarations of Interest Form

---

## Part A. Material Interests in Companies

### Equity

1. Do you currently or in the past 24 months have you had equity in any for-profit company that develops, produces, markets, or distributes drugs, devices, services, or therapies used to diagnose, treat, monitor, manage, or alleviate health conditions? Equity includes stock, stock options, and other ownership interests but excludes diversified mutual fund shares.

No

Yes, as described below:

Add rows as needed for each equity interest.

| <i>Company</i> | <i>Description</i> | <i>Date Divested</i> | <i>For ASH Internal Use</i> |
|----------------|--------------------|----------------------|-----------------------------|
|                |                    |                      |                             |
|                |                    |                      |                             |

### Patents and Royalties

2. Do you currently or in the past 24 months have you owned patents for or received royalties from any intellectual property or product used to diagnose, treat, monitor, manage, or alleviate health conditions?

No

Yes, as described below:

Add rows as needed for each patent or royalty interest.

| <i>Company</i> | <i>Description</i> | <i>Date Divested</i> | <i>For ASH Internal Use</i> |
|----------------|--------------------|----------------------|-----------------------------|
|                |                    |                      |                             |
|                |                    |                      |                             |

### Personal Income or Other Remuneration

3. Do you currently or in the past 24 months have you received personal income or other remuneration (e.g., reimbursement or financial support for the costs of travel) from any for-profit company that develops, produces, markets, or distributes drugs, devices, services, or therapies used to diagnose, treat, monitor, manage, or alleviate health conditions?

No

Yes, as described below:

Column 1 Name the company.

Column 2 Describe the activity for which you received income or other remuneration, e.g., employment, consultancy, speakers bureau involvement, service on an advisory committee or board, expert testimony.

Column 3 Indicate when the activity ended, if applicable. (If the activity has not yet ended, indicate “current” or “ongoing.”)

Add rows as needed for each activity.

To report activities that generate revenues for your institution, see Part B, Question 4.

| <i>Company</i> | <i>Description</i> | <i>End Date</i> | <i>For ASH Internal Use</i> |
|----------------|--------------------|-----------------|-----------------------------|
|                |                    |                 |                             |
|                |                    |                 |                             |
|                |                    |                 |                             |

### Industry-Funded Research

4. Do you currently or in the past 24 months have you been involved in research funded or supported (e.g., in kind support) by any for-profit company that develops, produces, markets, or distributes drugs, devices, services, or therapies used to diagnose, treat, monitor, manage, or alleviate health conditions?

No

Yes, as described below:

- Column 1 Name the company funding or supporting the research.
- Column 2 Briefly describe the research project. Indicate if funding or support goes to you directly or to your institution.
- Column 3 Describe your role: (a) national or overall principal investigator, (b) member of a steering committee of a study that does not have a principal investigator, (c) site or local investigator. If other than these options, please describe.
- Column 4 Indicate when your involvement ended, if applicable. (If your involvement has not yet ended, indicate “current” or “ongoing.”)

Add rows as needed for each research project.

| <i>Company</i> | <i>Description of Research</i>                                                               | <i>My Role</i> | <i>End Date</i> | <i>For ASH Internal Use</i>                                                                                                                                                                                                                                                       |
|----------------|----------------------------------------------------------------------------------------------|----------------|-----------------|-----------------------------------------------------------------------------------------------------------------------------------------------------------------------------------------------------------------------------------------------------------------------------------|
| BMS/Pfizer     | ADAM VTE study- RCT of apixaban vs dalteparin for cancer associated thrombosis               | Coinvestigator | ongoing         | Not a COI. BMS/Pfizer markets apixaban, however these guidelines on Thrombophilia will addressing Thrombophilia testing, are not expected to address specific anticoagulants. Additionally, Dr. Houghton does not have a leadership role and all funding goes to his institution. |
| BMS/Pfizer     | EVE study- RCT of apixaban 2.5mg vs 5mg extended prophylaxis in cancer associated thrombosis | Coinvestigator | ongoing         | Not a COI. BMS/Pfizer markets apixaban, however these guidelines on Thrombophilia will addressing Thrombophilia testing, are not expected to address specific anticoagulants. Additionally, Dr. Houghton does not have a leadership role and all funding goes to his institution. |

| <i>Company</i> | <i>Description of Research</i>                      | <i>My Role</i> | <i>End Date</i> | <i>For ASH Internal Use</i>                                                                                                                                                                                                                                                    |
|----------------|-----------------------------------------------------|----------------|-----------------|--------------------------------------------------------------------------------------------------------------------------------------------------------------------------------------------------------------------------------------------------------------------------------|
| BMS/Pfizer     | RCT – apixaban vs placebo for treatment of calf DVT | Coinvestigator | ongoing         | Not a COI. BMS/Pfizer markets apixaban, however these guidelines on Thrombophilia will address Thrombophilia testing, are not expected to address specific anticoagulants. Additionally, Dr. Houghton does not have a leadership role and all funding goes to his institution. |

### My Partner’s or Spouse’s Interests

5. Currently or in the past 24 months has *your partner or spouse* had any of the interests described in questions 1-4?

No

Yes, as described below:

Add rows as needed for each interest.

| <i>Company</i> | <i>Description</i> | <i>End Date</i> | <i>For ASH Internal Use</i> |
|----------------|--------------------|-----------------|-----------------------------|
|                |                    |                 |                             |
|                |                    |                 |                             |
|                |                    |                 |                             |

## Part B. Interests That Are Not Mainly Financial

You have been invited by ASH to participate in the development of clinical practice guidelines on the following topic(s):

Thrombophilia Guideline Panel

The questions that follow are designed to elicit information about personal beliefs, intellectual positions or opinions, institutional relationships, and other interests that are not mainly financial and that may be relevant to guidelines on the above topic(s).

### Personal Beliefs

1. Do you have strongly held beliefs related to the topic of these guidelines?

No

Yes

If yes, please explain:

### Previously Published Opinions

2. Have you ever authored, coauthored, or publicly provided an opinion related to the topic of these guidelines, e.g., a clinical practice guideline, textbook, review article, meeting poster or presentation, grand rounds talk, letter to the editor?

No

Yes

If yes, what were those views and where were they made?

### Research

3. Currently or in the past 24 months, have you been involved in a leadership role in any research project not already reported under Part A, Question 4, relevant to the topic of these guidelines, e.g., a research project funded by a nonprofit or governmental organization?

No



Yes, as described below:

Column 1 Name the entity funding the research.

Column 2 Describe the research project.

Column 3 Describe your role: (a) national or overall principal investigator, (b) member of a steering committee of a study that does not have a principal investigator, (c) site or local investigator. If other than these options, please describe.

Column 4 Indicate when your involvement ended, if applicable. (If your involvement has not yet ended, indicate “current” or “ongoing.”)

Add rows as needed for each research project.

| <i>Funder</i> | <i>Description of Research</i>                         | <i>My Role</i> | <i>End Date</i> |
|---------------|--------------------------------------------------------|----------------|-----------------|
| Mayo Clinic   | Treatment of upper extremity DVT with DOACs            | PI             | ongoing         |
| Mayo Clinic   | Calf pump function and risk for venous thromboembolism | PI             | ongoing         |
|               |                                                        |                |                 |

## Institutional Relationships

4. Do you generate revenues or nonfinancial benefits for your institution by teaching, speaking, consulting, testifying, writing, or otherwise sharing your knowledge or opinions about this guideline topic?

Don't know

No

Yes

If yes, please explain: Clinical consults for patients with venous and arterial thromboembolism and inherited and acquired thrombophilia.

5. Could your institution benefit or be harmed by recommendations of guidelines on this topic?

Don't know

No

Yes

If yes, please explain:

## Career Advancement

6. How would you characterize the support you would receive from your primary mentor, institution, or other entities if your work on this panel or authorship of these guidelines generated a strong reaction from peers outside your institution?

As long as those recommendations are based in fact and evidence, my institution, mentors, and colleagues would respect those conclusions.

## Advocacy and Policy Positions

7. Do you work for or are you a member of an organization with a stated position related to the topic of these guidelines, e.g., position statement, editorial, blog, amicus brief, or legislature or legal testimony?

No

Yes

If yes, are you involved in formulating or voting for positions?

No

Yes

If yes, could recommendations of these guidelines conflict with policies you have promoted or are obligated to follow?

Don't know or not applicable

No

Yes

If yes, please explain:

## Professional Specialty

8. What is your primary clinical specialty or subspecialty?  
Hematology & Vascular Medicine

9. Do you prescribe or otherwise recommend diagnostic tests or treatments that may be addressed by these guidelines?

No

Yes

If yes, please explain: Clinical consults for patients with venous and arterial thromboembolism and inherited and acquired thrombophilia

## Expected Interests

10. Do you expect new financial or nonfinancial interests relevant to the topic of these guidelines not already declared in Part A or Part B of this form?

No

Yes

If yes, please describe:

## Part C. Summary (ASH Internal Use)

ASH will review your disclosures and summarize here interests that are judged to be current, material, and with an affected company. You will then be invited to review our determinations and to agree to make all parts of this form (A, B and C) publically available.

|                            |                                  |
|----------------------------|----------------------------------|
| Name of guideline panel(s) | Guideline Panel on Thrombophilia |
|----------------------------|----------------------------------|

| <i>Approved to participate?</i> | <i>Status</i>         | <i>Recusal may be required?</i> | <i>Reviewer Name and Date</i> | <i>Notes</i>                                                                                         |
|---------------------------------|-----------------------|---------------------------------|-------------------------------|------------------------------------------------------------------------------------------------------|
| Yes                             | Unconflicted majority | No                              | 11/26/2018<br>Alexander       | Dr. Houghton does not have any current financial conflicts of interest.                              |
| Yes                             | Unconflicted majority | No                              | 3/22/2019<br>Alexander        | On 3/21/2019, Dr. Houghton confirmed all information in this form.                                   |
| Yes                             | Unconflicted majority | No                              | 5/5/2020<br>Alexander         | On 5/1/2020, Dr. Houghton confirmed all information in this form.                                    |
| Yes                             | Unconflicted majority | No                              | 10/11/2022                    | On 10/3/2022, Dr. Houghton confirmed all information in this form (new disclosures in Part D below). |

If status is conflicted minority, summarize all current material interests in affected companies:

| <i>Company</i> | <i>Description</i> | <i>Disclosure Date</i> | <i>ASH Notes</i> |
|----------------|--------------------|------------------------|------------------|
|                |                    |                        |                  |
|                |                    |                        |                  |
|                |                    |                        |                  |
|                |                    |                        |                  |

Notes:

Dr. Houghton disclosed research funding from Mayo Clinic for research related to the guideline topic. He also disclosed providing clinical consults for patients with venous and arterial thromboembolism and inherited and acquired thrombophilia.

## Part D. New Declarations

The following interests were disclosed after appointment:

| <i>Company</i>                             | <i>Description</i>                                                                                                                                      | <i>Disclosure Date</i> | <i>ASH Internal Notes</i>                                                                      |
|--------------------------------------------|---------------------------------------------------------------------------------------------------------------------------------------------------------|------------------------|------------------------------------------------------------------------------------------------|
| Moore Foundation                           | Funding from Moore Foundation for project related to quality improvement in diagnosis and risk stratification for pulmonary emboli                      | 3/4/2022               | Not a COI. The Moore Foundation is a non profit organization.                                  |
| Mayo Clinic                                | Mayo Clinic: Artificial Intelligence INR management for Coumadin Clinics                                                                                | 3/4/2022               | Not a COI.                                                                                     |
| Mayo Clinic                                | Mayo Clinic: Prediction of Pulmonary Embolism from ECG tracings using machine learning                                                                  | 3/4/2022               | Not a COI.                                                                                     |
| Hemostasis and Thrombosis Research Society | Hemostasis and Thrombosis Research Society: Ultrasound shear wave elastography parameters of deep vein thrombosis and prediction of thrombus resolution | 3/4/2022               | Not a COI. Hemostasis and Thrombosis Research Society is a non profit organization.            |
| <i>The Hematologist</i>                    | Payments from <i>The Hematologist</i> for writing articles                                                                                              | 10/3/2022              | Not a COI. <i>The Hematologist</i> is a publication by ASH, which is a nonprofit organization. |
| BMJ Online                                 | Payment from BMJ Online for writing an article about                                                                                                    | 10/3/2022              | Not a COI. <i>BMJ Online</i> is a nonprofit academic journal.                                  |

| <i>Company</i>                             | <i>Description</i>                                                                                                                                                                                                                                                         | <i>Disclosure Date</i> | <i>ASH Internal Notes</i>                           |
|--------------------------------------------|----------------------------------------------------------------------------------------------------------------------------------------------------------------------------------------------------------------------------------------------------------------------------|------------------------|-----------------------------------------------------|
|                                            | antiphospholipid syndrome                                                                                                                                                                                                                                                  |                        |                                                     |
| Hemostasis and Thrombosis Research Society | Mentored Research Grant from the Hemostasis and Thrombosis Research Society                                                                                                                                                                                                | 10/3/2022              | Not a COI. This is a nonprofit organization.        |
| Mayo Clinic                                | Internal grants from Mayo Clinic to study the following:<br>1. Artificial Intelligence to predict cardiovascular disease from facial photographs<br>2. Development of machine learning techniques for management of warfarin and optimization of time in therapeutic range | 10/3/2022              | Not a COI. Mayo Clinic is a nonprofit organization. |



# ASH Guideline Panel Declarations of Interest Form

## Part A. Material Interests in Companies

### Equity

1. Do you currently or in the past 24 months have you had equity in any for-profit company that develops, produces, markets, or distributes drugs, devices, services, or therapies used to diagnose, treat, monitor, manage, or alleviate health conditions? Equity includes stock, stock options, and other ownership interests but excludes diversified mutual fund shares.

No

Yes, as described below:

Add rows as needed for each equity interest.

| <i>Company</i> | <i>Description</i> | <i>Date Divested</i> | <i>For ASH Internal Use</i> |
|----------------|--------------------|----------------------|-----------------------------|
|                |                    |                      |                             |
|                |                    |                      |                             |
|                |                    |                      |                             |
|                |                    |                      |                             |

### Patents and Royalties

2. Do you currently or in the past 24 months have you owned patents for or received royalties from any intellectual property or product used to diagnose, treat, monitor, manage, or alleviate health conditions?

No

Yes, as described below:

Add rows as needed for each patent or royalty interest.

| <i>Company</i> | <i>Description</i> | <i>Date Divested</i> | <i>For ASH Internal Use</i> |
|----------------|--------------------|----------------------|-----------------------------|
|                |                    |                      |                             |
|                |                    |                      |                             |
|                |                    |                      |                             |
|                |                    |                      |                             |

### Personal Income or Other Remuneration

3. Do you currently or in the past 24 months have you received personal income or other remuneration (e.g., reimbursement or financial support for the costs of travel) from any for-profit company that develops, produces, markets, or distributes drugs, devices, services, or therapies used to diagnose, treat, monitor, manage, or alleviate health conditions?

No

Yes, as described below:

Column 1 Name the company.

Column 2 Describe the activity for which you received income or other remuneration, e.g., employment, consultancy, speakers bureau involvement, service on an advisory committee or board, expert testimony.

Column 3 Indicate when the activity ended, if applicable. (If the activity has not yet ended, indicate “current” or “ongoing.”)

Add rows as needed for each activity.

To report activities that generate revenues for your institution, see Part B, Question 4.

| <i>Company</i> | <i>Description</i>                                              | <i>End Date</i>                                       | <i>For ASH Internal Use</i>                                                                                                               |
|----------------|-----------------------------------------------------------------|-------------------------------------------------------|-------------------------------------------------------------------------------------------------------------------------------------------|
| Bayer          | Consultancy, Advisory Board participation, Honoraria as Speaker | Occasional in the last 24 months; no ongoing contract | No COI. Bayer markets rivaroxaban; however, these guidelines on thrombophilia are not expected to address use of specific anticoagulants. |
| Biogen Idec    | Consultancy, Advisory Board participation, Honoraria as Speaker | Occasional in the last 24 months; no ongoing contract | No COI. Biogen has no products that could be affected by guidelines on thrombophilia.                                                     |



| <i>Company</i> | <i>Description</i>                        | <i>End Date</i>                                       | <i>For ASH Internal Use</i>                                                                                                             |
|----------------|-------------------------------------------|-------------------------------------------------------|-----------------------------------------------------------------------------------------------------------------------------------------|
| Pfizer         | Honoraria as Speaker                      | Occasional in the last 24 months; no ongoing contract | No COI. Pfizer markets LMWHs; however, these guidelines on thrombophilia are not expected to address use of specific anticoagulants.    |
| Octapharma     | Consultancy, Advisory Board participation | Occasional in the last 24 months; no ongoing contract | No COI. Octapharma markets Octaplex, a reversal agent; however, these guidelines are not expected to address use of or reversal agents. |
| Baxter         | Honoraria as Speaker                      | Occasional in the last 24 months; no ongoing contract | No COI. Baxter previously marketed heparins but no longer has any VTE-related products.                                                 |
|                |                                           |                                                       |                                                                                                                                         |
|                |                                           |                                                       |                                                                                                                                         |
|                |                                           |                                                       |                                                                                                                                         |

### Industry-Funded Research

4. Do you currently or in the past 24 months have you been involved in research funded or supported (e.g., in kind support) by any for-profit company that develops, produces, markets, or distributes drugs, devices, services, or therapies used to diagnose, treat, monitor, manage, or alleviate health conditions?

No

Yes, as described below:

Column 1 Name the company funding or supporting the research.

Column 2 Briefly describe the research project. Indicate if funding or support goes to you directly or to your institution.

Column 3 Describe your role: (a) national or overall principal investigator, (b) member of a steering committee of a study that does not have a principal investigator, (c) site or local investigator. If other than these options, please describe.

Column 4 Indicate when your involvement ended, if applicable. (If your involvement has not yet ended, indicate “current” or “ongoing.”)

Add rows as needed for each research project.

| <i>Company</i> | <i>Description of Research</i>                                                                            | <i>My Role</i>     | <i>End Date</i> | <i>For ASH Internal Use</i>                                                                                                                                                                                                                                                                               |
|----------------|-----------------------------------------------------------------------------------------------------------|--------------------|-----------------|-----------------------------------------------------------------------------------------------------------------------------------------------------------------------------------------------------------------------------------------------------------------------------------------------------------|
| Pfizer         | IIR – Characteristics of inhibitor patients in hemophilia A previously treated patients                   | PI                 | 2014-June       | Ended before appointment                                                                                                                                                                                                                                                                                  |
| Baxter         | Meta-analysis of post-marketing authorization studies on Advate                                           | Co-PI              | 2014-Nov        | Ended before appointment                                                                                                                                                                                                                                                                                  |
| Novo-Nordisk   | Systematic Review of Pharmacokinetic studies of treatment concentrates use in hemophilia A and B patients | PI                 | 2014-Jun        | Ended before appointment                                                                                                                                                                                                                                                                                  |
| Wilate         | Observational registry of efficacy and safety of Wilate in patients with Hemophilia A                     | Local investigator | Ongoing         | No COI. Wilate is a product of Octapharma. This company also makes Octaplex, a reversal agent; however, these guidelines are not expected to include recommendations about specific anticoagulants or reversal agents. Additionally, this is not a leadership role, and the research is unrelated to VTE. |
|                |                                                                                                           |                    |                 |                                                                                                                                                                                                                                                                                                           |
|                |                                                                                                           |                    |                 |                                                                                                                                                                                                                                                                                                           |
|                |                                                                                                           |                    |                 |                                                                                                                                                                                                                                                                                                           |

### My Partner’s or Spouse’s Interests

5. Currently or in the past 24 months has *your partner or spouse* had any of the interests described in questions 1-4?

No

Yes, as described below:

Add rows as needed for each interest.

| <i>Company</i> | <i>Description</i> | <i>End Date</i> | <i>For ASH Internal Use</i> |
|----------------|--------------------|-----------------|-----------------------------|
|                |                    |                 |                             |
|                |                    |                 |                             |
|                |                    |                 |                             |

# Part B. Interests That Are Not Mainly Financial

You have been invited by ASH to participate in the development of clinical practice guidelines on the following topic(s):

Thrombophilia

The questions that follow are designed to elicit information about personal beliefs, intellectual positions or opinions, institutional relationships, and other interests that are not mainly financial and that may be relevant to guidelines on the above topic(s).

## Personal Beliefs

1. Do you have strongly held beliefs related to the topic of these guidelines?

No

Yes

If yes, please explain:

## Previously Published Opinions

2. Have you ever authored, coauthored, or publicly provided an opinion related to the topic of these guidelines, e.g., a clinical practice guideline, textbook, review article, meeting poster or presentation, grand rounds talk, letter to the editor?

No

Yes

If yes, what were those views and where were they made?

Review of the evidence with balanced view on potential roles and limitations

Kenet G, Lütkehoff LK, Albisetti M, et al. Impact of Thrombophilia on Risk of Arterial Ischemic Stroke or Cerebral Sinovenous Thrombosis in Neonates and Children: A Systematic Review and Meta-Analysis of Observational Studies. *Circulation* 2010; 121:1838–47.  
doi:10.1161/CIRCULATIONAHA.109.913673

Iorio A, Barnes C, Vedovati MC, et al. Thrombophilia and cerebral vein thrombosis. *Front Neurol Neurosci* 2008; 23:55–76. Doi: 10.1159/0000111261

## Research

3. Currently or in the past 24 months, have you been involved in a leadership role in any research project not already reported under Part A, Question 4, relevant to the topic of these guidelines, e.g., a research project funded by a nonprofit or governmental organization?

No

Yes, as described below:

Column 1 Name the entity funding the research.

Column 2 Describe the research project.

Column 3 Describe your role: (a) national or overall principal investigator, (b) member of a steering committee of a study that does not have a principal investigator, (c) site or local investigator. If other than these options, please describe.

Column 4 Indicate when your involvement ended, if applicable. (If your involvement has not yet ended, indicate "current" or "ongoing.")

Add rows as needed for each research project.

| <i>Funder</i> | <i>Description of Research</i> | <i>My Role</i> | <i>End Date</i> |
|---------------|--------------------------------|----------------|-----------------|
|               |                                |                |                 |
|               |                                |                |                 |
|               |                                |                |                 |
|               |                                |                |                 |

## Institutional Relationships

4. Do you generate revenues or nonfinancial benefits for your institution by teaching, speaking, consulting, testifying, writing, or otherwise sharing your knowledge or opinions about this guideline topic?

Don't know

No

Yes

If yes, please explain:

5. Could your institution benefit or be harmed by recommendations of guidelines on this topic?

Don't know

No

Yes

If yes, please explain:

## Career Advancement

6. How would you characterize the support you would receive from your primary mentor, institution, or other entities if your work on this panel or authorship of these guidelines generated a strong reaction from peers outside your institution?

I would expect support, provided the guideline has been transparently evidence based.

## Advocacy and Policy Positions

7. Do you work for or are you a member of an organization with a stated position related to the topic of these guidelines, e.g., position statement, editorial, blog, amicus brief, or legislature or legal testimony?

No

Yes

If yes, are you involved in formulating or voting for positions?

No

Yes

If yes, could recommendations of these guidelines conflict with policies you have promoted or are obligated to follow?

Don't know or not applicable

No

Yes

If yes, please explain:

## Professional Specialty

8. What is your primary clinical specialty or subspecialty?

Internal medicine, Clinical Chemistry and Biochemistry

9. Do you prescribe or otherwise recommend diagnostic tests or treatments that may be addressed by these guidelines?

No

Yes

If yes, please explain:

As a practicing clinician working in the field in thrombosis I occasionally prescribe thrombophilia screening; sometimes I counsel patients based on thrombophilia tests

### Expected Interests

10. Do you expect new financial or nonfinancial interests relevant to the topic of these guidelines not already declared in Part A or Part B of this form?

No

Yes

If yes, please describe:

## Part C. Summary (ASH Internal Use)

ASH will review your disclosures and summarize here interests that are judged to be current, material, and with an affected company. You will then be invited to review our determinations and to agree to make all parts of this form (A, B and C) publically available.

|                            |                                  |
|----------------------------|----------------------------------|
| Name of guideline panel(s) | Guideline Panel on Thrombophilia |
|----------------------------|----------------------------------|

| <i>Approved to participate?</i> | <i>Status</i>         | <i>Recusal may be required?</i> | <i>Reviewer name and date</i>                   | <i>Notes</i>                                                                                                                                                                     |
|---------------------------------|-----------------------|---------------------------------|-------------------------------------------------|----------------------------------------------------------------------------------------------------------------------------------------------------------------------------------|
| Yes                             | Unconflicted majority | No                              | 04/20/2015;<br>4/26/2015                        | Dr. Iorio has recent and current relationships with companies that make anticoagulation products; however, these guidelines are not expected to address specific anticoagulants. |
| Yes                             | Unconflicted majority | No                              | 03/22/2017<br>Alexander;<br>3/24/2017<br>Kunkle | Dr. Iorio discloses continued consulting and speaking for companies that market anticoagulation products. See Part D.                                                            |
| Yes                             | Unconflicted majority | No                              | 5/5/2020<br>Alexander                           | On 5/4/2020, Dr. Iorio confirmed all information in this form.                                                                                                                   |
| Yes                             | Unconflicted majority | No                              | 3/11/2022<br>Alexander                          | New disclosures. See Part D.                                                                                                                                                     |
| Yes                             | Unconflicted majority | No                              | 10/11/2022<br>Kunkle                            | On 9/29/2022, Dr. Iorio confirmed all information in this form.                                                                                                                  |

If status is conflicted minority, summarize all current material interests in affected companies:

| <i>Company</i> | <i>Description</i> | <i>Disclosure Date</i> | <i>ASH Notes</i> |
|----------------|--------------------|------------------------|------------------|
|                |                    |                        |                  |
|                |                    |                        |                  |

Notes:

|  |
|--|
|  |
|--|



## Part D. New Declarations

The following interests were disclosed after appointment:

| <i>Company</i> | <i>Description</i>                                                                                                                                                | <i>Disclosure Date</i> | <i>ASH Internal Notes</i>                                                                                                                                                                  |
|----------------|-------------------------------------------------------------------------------------------------------------------------------------------------------------------|------------------------|--------------------------------------------------------------------------------------------------------------------------------------------------------------------------------------------|
| Bayer          | Direct payments for consulting, advisory board participation, speaking. This relationship was occasional until 18 months ago and there is no ongoing contract.    | 3/22/2017              | Update to Part A Question 3. No COI. Bayer markets rivaroxaban; however, these guidelines on thrombophilia are not expected to address use of specific anticoagulants.                     |
| Biogen Idec    | Direct payments for consulting, advisory board participation and speaking. This relationship was occasional until 18 months ago and there is no ongoing contract. | 3/22/2017              | Update to Part A Question 3. No COI. Biogen has no products that could be affected by guidelines on Thrombophilia.                                                                         |
| Pfizer         | Direct payments for speaking. This relationship was occasional until 18 months ago and there is no ongoing contract                                               | 3/22/2017              | Update to Part A Question 3. No COI. Pfizer markets LMWHs and apixaban; however, these guidelines on thrombophilia are not expected to address use of specific anticoagulants.             |
| Octapharma     | Direct payments for consulting and advisory board participation. This relationship was occasional until 18 months ago and there is no ongoing contract.           | 3/22/2017              | Update to Part A Question 3. No COI. Octapharma markets Octaplex, a reversal agent; however, these guidelines on thrombophilia are not expected to address use of specific anticoagulants. |
| Pfizer         | Local PI for a study on gene therapy in                                                                                                                           | 3/8/2022               | No COI. Pfizer markets LMWHs and apixaban;                                                                                                                                                 |

| <i>Company</i> | <i>Description</i>                                                                                                                                                                                                                                                                                                                                     | <i>Disclosure Date</i> | <i>ASH Internal Notes</i>                                                                                                                                                                                         |
|----------------|--------------------------------------------------------------------------------------------------------------------------------------------------------------------------------------------------------------------------------------------------------------------------------------------------------------------------------------------------------|------------------------|-------------------------------------------------------------------------------------------------------------------------------------------------------------------------------------------------------------------|
|                | hemophilia (2017 – 2019)                                                                                                                                                                                                                                                                                                                               |                        | however, these guidelines on thrombophilia do not address use of specific anticoagulants.                                                                                                                         |
| Roche          | Local PI for a study on Hemophilia Prophylaxis with Emicizumab. (2017 – 2019)                                                                                                                                                                                                                                                                          | 3/8/2022               | Roache markets diagnostic tests for VTE. However, the subject of the research is not related to the guideline topic, Dr. Iorio does not have a leadership role, and all funding goes directly to his institution. |
|                | <p>Dr. Iorio disclosed:</p> <p>“Between 2017 and 2019 I have not accepted direct payment from industry, and any money for my consultant work or for speaking engagement was paid to McMaster University, and not to myself.</p> <p>From Jan 1 2020 onward, I have not received any money from industry at all, neither directly nor via McMaster.”</p> | 3/8/2022               |                                                                                                                                                                                                                   |



# ASH Guideline Panel Declarations of Interest Form

## Part A. Material Interests in Companies

### Equity

1. Do you currently or in the past 24 months have you had equity in any for-profit company that develops, produces, markets, or distributes drugs, devices, services, or therapies used to diagnose, treat, monitor, manage, or alleviate health conditions? Equity includes stock, stock options, and other ownership interests but excludes diversified mutual fund shares.

No

Yes, as described below:

Add rows as needed for each equity interest.

| <i>Company</i> | <i>Description</i> | <i>Date Divested</i> | <i>For ASH Internal Use</i> |
|----------------|--------------------|----------------------|-----------------------------|
|                |                    |                      |                             |
|                |                    |                      |                             |
|                |                    |                      |                             |
|                |                    |                      |                             |

### Patents and Royalties

2. Do you currently or in the past 24 months have you owned patents for or received royalties from any intellectual property or product used to diagnose, treat, monitor, manage, or alleviate health conditions?

No

Yes, as described below:

Add rows as needed for each patent or royalty interest.

| <i>Company</i> | <i>Description</i> | <i>Date Divested</i> | <i>For ASH Internal Use</i> |
|----------------|--------------------|----------------------|-----------------------------|
|                |                    |                      |                             |
|                |                    |                      |                             |
|                |                    |                      |                             |
|                |                    |                      |                             |

### Personal Income or Other Remuneration

3. Do you currently or in the past 24 months have you received personal income or other remuneration (e.g., reimbursement or financial support for the costs of travel) from any for-profit company that develops, produces, markets, or distributes drugs, devices, services, or therapies used to diagnose, treat, monitor, manage, or alleviate health conditions?

No

Yes, as described below:

Column 1 Name the company.

Column 2 Describe the activity for which you received income or other remuneration, e.g., employment, consultancy, speakers bureau involvement, service on an advisory committee or board, expert testimony.

Column 3 Indicate when the activity ended, if applicable. (If the activity has not yet ended, indicate “current” or “ongoing.”)

Add rows as needed for each activity.

To report activities that generate revenues for your institution, see Part B, Question 4.

| <i>Company</i> | <i>Description</i>                                         | <i>End Date</i>                        | <i>For ASH Internal Use</i> |
|----------------|------------------------------------------------------------|----------------------------------------|-----------------------------|
| Baxter         | von Willebrand Disease Advisory Board                      | 12/5/14 – 12/5/14                      | Ended before appointment    |
| CSL Behring    | von Willebrand Disease Advisory Board                      | 11/14/2014                             | Ended before appointment    |
| CSL Behring    | Spoke at two von Willebrand disease educational symposiums | 11/7 – 11/8, 2014<br>1-16 – 1/17, 2015 | Ended before appointment    |
|                |                                                            |                                        |                             |
|                |                                                            |                                        |                             |
|                |                                                            |                                        |                             |

## Industry-Funded Research

4. Do you currently or in the past 24 months have you been involved in research funded or supported (e.g., in kind support) by any for-profit company that develops, produces, markets, or distributes drugs, devices, services, or therapies used to diagnose, treat, monitor, manage, or alleviate health conditions?

No

Yes, as described below:

Column 1 Name the company funding or supporting the research.

Column 2 Briefly describe the research project. Indicate if funding or support goes to you directly or to your institution.

Column 3 Describe your role: (a) national or overall principal investigator, (b) member of a steering committee of a study that does not have a principal investigator, (c) site or local investigator. If other than these options, please describe.

Column 4 Indicate when your involvement ended, if applicable. (If your involvement has not yet ended, indicate “current” or “ongoing.”)

Add rows as needed for each research project.

| <i>Company</i> | <i>Description of Research</i> | <i>My Role</i> | <i>End Date</i> | <i>For ASH Internal Use</i> |
|----------------|--------------------------------|----------------|-----------------|-----------------------------|
|                |                                |                |                 |                             |
|                |                                |                |                 |                             |

## My Partner’s or Spouse’s Interests

5. Currently or in the past 24 months has *your partner or spouse* had any of the interests described in questions 1-4?

No

Yes, as described below:

Add rows as needed for each interest.

| <i>Company</i> | <i>Description</i> | <i>End Date</i> | <i>For ASH Internal Use</i> |
|----------------|--------------------|-----------------|-----------------------------|
|                |                    |                 |                             |
|                |                    |                 |                             |
|                |                    |                 |                             |

## Part B. Interests That Are Not Mainly Financial

You have been invited by ASH to participate in the development of clinical practice guidelines on the following topic(s):

VTE in the Context of Pregnancy

The questions that follow are designed to elicit information about personal beliefs, intellectual positions or opinions, institutional relationships, and other interests that are not mainly financial and that may be relevant to guidelines on the above topic(s).

### Personal Beliefs

1. Do you have strongly held beliefs related to the topic of these guidelines?

No

Yes

If yes, please explain: **None that I hope aren't based in the little evidence we have on the subject.**

### Previously Published Opinions

2. Have you ever authored, coauthored, or publicly provided an opinion related to the topic of these guidelines, e.g., a clinical practice guideline, textbook, review article, meeting poster or presentation, grand rounds talk, letter to the editor?

No

Yes

If yes, what were those views and where were they made? **I was head author on the American College of Obstetricians and Gynecologist Practice Bulletin on the subject. While I was head author, the guidelines were the work of many experts and did not represent my opinion(s) alone. A copy of the Practice Bulletin is attached as is the most recent review article I published on the subject.**

[4/14/2015 ASH Internal note: This is the citation: James, A. Practice Bulletin No. 123: Thromboembolism in Pregnancy. Obstetrics & Gynecology. 118\(3\): 718-729, September 2011.](#)

## Research

3. Currently or in the past 24 months, have you been involved in a leadership role in any research project not already reported under Part A, Question 4, relevant to the topic of these guidelines, e.g., a research project funded by a nonprofit or governmental organization?

- No
- Yes, as described below:

Column 1 Name the entity funding the research.

Column 2 Describe the research project.

Column 3 Describe your role: (a) national or overall principal investigator, (b) member of a steering committee of a study that does not have a principal investigator, (c) site or local investigator. If other than these options, please describe.

Column 4 Indicate when your involvement ended, if applicable. (If your involvement has not yet ended, indicate “current” or “ongoing.”)

Add rows as needed for each research project.

| <i>Funder</i> | <i>Description of Research</i>                                  | <i>My Role</i>     | <i>End Date</i> |
|---------------|-----------------------------------------------------------------|--------------------|-----------------|
| NIH/CIHR      | Pilot trial of postpartum thromboprophylaxis in high-risk women | Local Investigator | 6/2014          |
|               |                                                                 |                    |                 |
|               |                                                                 |                    |                 |
|               |                                                                 |                    |                 |

## Institutional Relationships

4. Do you generate revenues or nonfinancial benefits for your institution by teaching, speaking, consulting, testifying, writing, or otherwise sharing your knowledge or opinions about this guideline topic?

- Don't know
- No
- Yes

If yes, please explain: **I am consulted by hematologists and obstetricians about pregnant women with blood clots. Subsequently, they are often cared for by me and/or at my institution.**

5. Could your institution benefit or be harmed by recommendations of guidelines on this topic?

Don't know

No

Yes

If yes, please explain:

## Career Advancement

6. How would you characterize the support you would receive from your primary mentor, institution, or other entities if your work on this panel or authorship of these guidelines generated a strong reaction from peers outside your institution? **Unaffected.**

## Advocacy and Policy Positions

7. Do you work for or are you a member of an organization with a stated position related to the topic of these guidelines, e.g., position statement, editorial, blog, amicus brief, or legislature or legal testimony?

No

Yes

If yes, are you involved in formulating or voting for positions?

No

Yes

If yes, could recommendations of these guidelines conflict with policies you have promoted or are obligated to follow?

Don't know or not applicable

No

Yes

If yes, please explain:



## Professional Specialty

8. What is your primary clinical specialty or subspecialty? **Obstetrics and Gynecology, Maternal-Fetal Medicine**

9. Do you prescribe or otherwise recommend diagnostic tests or treatments that may be addressed by these guidelines?

No

Yes

If yes, please explain: **I am consulted by hematologists and obstetricians about pregnant women with blood clots. Subsequently, they are often cared for by me and/or at my institution.**

## Expected Interests

10. Do you expect new financial or nonfinancial interests relevant to the topic of these guidelines not already declared in Part A or Part B of this form?

No

Yes

If yes, please describe:

# Part C. Summary (ASH Internal Use)

ASH will review your disclosures and summarize here interests that are judged to be current, material, and with an affected company. You will then be invited to review our determinations and to agree to make all parts of this form (A, B and C) publically available.

|                            |                                                |
|----------------------------|------------------------------------------------|
| Name of guideline panel(s) | VTE in the Context of Pregnancy; Thrombophilia |
|----------------------------|------------------------------------------------|

| <i>Approved to participate?</i> | <i>Status</i>         | <i>Recusal may be required?</i> | <i>Review Name and Date</i> | <i>Notes</i>                                                                                 |
|---------------------------------|-----------------------|---------------------------------|-----------------------------|----------------------------------------------------------------------------------------------|
| Yes                             | Unconflicted majority | No                              | 04/14/2015;<br>4/16/2015    |                                                                                              |
| Yes                             | Unconflicted majority | No                              | 7/20/2018<br>Alexander      | New disclosures. See Part D. On 7/18/2018, Dr. James confirmed all information in this form. |
| Yes<br>(Thrombophilia)          | Unconflicted majority | No                              | 5/5/2020<br>Alexander       | New disclosures. See Part D.                                                                 |
| Yes<br>(Thrombophilia)          | Unconflicted majority | No                              | 3/10/2022                   | New disclosures. See Part D.                                                                 |
| Yes                             | Unconflicted majority | No                              | 10/18/2022<br>Smith         | New disclosures. See Part D,                                                                 |

If status is conflicted minority, summarize all current material interests in affected companies:

| <i>Company</i> | <i>Description</i> | <i>Disclosure Date</i> | <i>ASH Notes</i> |
|----------------|--------------------|------------------------|------------------|
|                |                    |                        |                  |
|                |                    |                        |                  |
|                |                    |                        |                  |
|                |                    |                        |                  |

Notes:

|  |
|--|
|  |
|--|

## Part D. New Declarations

The following interests were disclosed after appointment:

| <i>Company</i>         | <i>Description</i>                                                                                                                   | <i>Disclosure Date</i> | <i>ASH Internal Notes</i>                                                                                                                                                                                                                                                                                                                                          |
|------------------------|--------------------------------------------------------------------------------------------------------------------------------------|------------------------|--------------------------------------------------------------------------------------------------------------------------------------------------------------------------------------------------------------------------------------------------------------------------------------------------------------------------------------------------------------------|
| Hemabiologics          | Direct payment for consulting on reproductive issues in von Willebrand disease in May 2017                                           | 7/12/2018              | Not a COI. Hemabiologics does not market any products or devices used in the diagnosis or treatment of VTE.                                                                                                                                                                                                                                                        |
| CSL Behring            | Direct payment for serving on an advisory board on von Willebrand disease in June 2017                                               | 7/12/2018              | Not a COI. CSL Behring markets Kcentra, a wayfaring reversal agent. However, warfarin is contraindicated in pregnant patients and these guidelines do not address its use. Additionally, the pregnancy panel had finished forming recommendations when this activity occurred. These thrombophilia guidelines will not address the use of specific anticoagulants. |
| American Regent        | Direct payment for serving on an advisory board regarding the diagnosis and management of iron deficiency and iron deficiency anemia | 5/2/2020               | Not a COI. American Regent does not market any products or devices used in the diagnosis or treatment of VTE.                                                                                                                                                                                                                                                      |
| Coagulant Therapeutics | Research funding                                                                                                                     | 3/2/2022               | Not a COI. Coagulant Therapeutics does not market any products or devices used the diagnosis or treatment of VTE. Dr. James confirmed that this                                                                                                                                                                                                                    |

| <i>Company</i>         | <i>Description</i>                                                                                                       | <i>Disclosure Date</i> | <i>ASH Internal Notes</i>                                                                                                                        |
|------------------------|--------------------------------------------------------------------------------------------------------------------------|------------------------|--------------------------------------------------------------------------------------------------------------------------------------------------|
|                        |                                                                                                                          |                        | research is unrelated to the guideline topic.                                                                                                    |
| Octapharma             | Honorarium                                                                                                               | 3/2/2022               | No COI. Octapharma markets Octaplex, a reversal agent; however, these guidelines on thrombophilia do not address use of specific anticoagulants. |
| Cerus                  | Honorarium                                                                                                               | 3/2/2022               | Not a COI. Cerus Therapeutics does not market or produce any products used in testing for thrombophilia.                                         |
| Tremeau                | Honorarium                                                                                                               | 3/2/2022               | Not a COI. Tremeau Therapeutics does not market or produce any products used in testing for thrombophilia.                                       |
| HemoSonics             | Honorarium                                                                                                               | 3/2/2022               | HemoSonics does not appear to market or produce any products used in testing for thrombophilia.                                                  |
| Duke University        | Employed as an emeritus professor                                                                                        | 10/13/2022             |                                                                                                                                                  |
| Coagulant Therapeutics | Grant support                                                                                                            | 10/13/2022             | Not a COI. Coagulant Therapeutics does not market any products or devices used the diagnosis or treatment of VTE.                                |
| Cerus                  | Direct payment for participating in a advisory board on plasma-derived fibrinogen/cryoprecipitate product for hemorrhage | 10/13/2022             | Not a COI. Cerus Therapeutics does not market or produce any products used in testing for thrombophilia.                                         |

| <i>Company</i> | <i>Description</i>                                                                      | <i>Disclosure Date</i> | <i>ASH Internal Notes</i>                                                                                                                        |
|----------------|-----------------------------------------------------------------------------------------|------------------------|--------------------------------------------------------------------------------------------------------------------------------------------------|
| Octapharma     | One time consult on plasma-derived von Willebrand concentrate in 2021                   | 10/13/2022             | No COI. Octapharma markets Octaplex, a reversal agent; however, these guidelines on thrombophilia do not address use of specific anticoagulants. |
| Tremeau        | One time consult on nonsteroidal inflammatory drug for heavy menstrual bleeding in 2021 | 10/13/2022             | Not a COI. Tremeau Therapeutics does not market or produce any products used in testing for thrombophilia.                                       |
| NovoNordisk    | One time consult recombinant factor VIIa for obstetric hemorrhage in 2021               | 10/13/2022             |                                                                                                                                                  |
| HemoSonics     | One time consult on coagulation laboratory analyzer in 2022                             | 10/13/2022             | HemoSonics does not appear to market or produce any products used in testing for thrombophilia.                                                  |



# ASH Guideline Panel Declarations of Interest Form

## Part A. Material Interests in Companies

### Equity

1. Do you currently or in the past 24 months have you had equity in any for-profit company that develops, produces, markets, or distributes drugs, devices, services, or therapies used to diagnose, - treat, monitor, manage, or alleviate health conditions? Equity includes stock, stock options, and other ownership interests but excludes diversified mutual fund shares.

No

Yes, as described below:

Add rows as needed for each equity interest.

| <i>Company</i> | <i>Description</i> | <i>Date Divested</i> | <i>For ASH Internal Use</i> |
|----------------|--------------------|----------------------|-----------------------------|
|                |                    |                      |                             |
|                |                    |                      |                             |
|                |                    |                      |                             |
|                |                    |                      |                             |

### Patents and Royalties

2. Do you currently or in the past 24 months have you owned patents for or received royalties from any intellectual property or product used to diagnose, treat, monitor, manage, or alleviate health conditions?

No

Yes, as described below:

Add rows as needed for each patent or royalty interest.

| <i>Company</i> | <i>Description</i> | <i>Date Divested</i> | <i>For ASH Internal Use</i> |
|----------------|--------------------|----------------------|-----------------------------|
|                |                    |                      |                             |
|                |                    |                      |                             |
|                |                    |                      |                             |
|                |                    |                      |                             |

### Personal Income or Other Remuneration

3. Do you currently or in the past 24 months have you received personal income or other remuneration (e.g., reimbursement or financial support for the costs of travel) from any for-profit company that develops, produces, markets, or distributes drugs, devices, services, or therapies used to diagnose, treat, monitor, manage, or alleviate health conditions?

No

Yes, as described below:

Column 1 Name the company.

Column 2 Describe the activity for which you received income or other remuneration, e.g., employment, consultancy, speakers bureau involvement, service on an advisory committee or board, expert testimony.

Column 3 Indicate when the activity ended, if applicable. (If the activity has not yet ended, indicate “current” or “ongoing.”)

Add rows as needed for each activity.

To report activities that generate revenues for your institution, see Part B, Question 4.

| <i>Company</i>             | <i>Description</i> | <i>End Date</i> | <i>For ASH Internal Use</i>                                             |
|----------------------------|--------------------|-----------------|-------------------------------------------------------------------------|
| Alberta Health Services    | Employment         | Current         | Clinical employment is not considered a financial COI under ASH policy. |
| University of Calgary      | Employment         | Current         | Academic employment is not considered a financial COI under ASH policy. |
| American Heart Association | Consulting         | Current         | Not a COI: AHA is a nonprofit organization.                             |

| <i>Company</i> | <i>Description</i>                                                         | <i>End Date</i> | <i>For ASH Internal Use</i>                                                                                                                                                                                               |
|----------------|----------------------------------------------------------------------------|-----------------|---------------------------------------------------------------------------------------------------------------------------------------------------------------------------------------------------------------------------|
| AstraZeneca    | One-time speaker on managing DOACs bleeding complication                   | Jan 2014        | Ended before appointment                                                                                                                                                                                                  |
| Bayer          | One-time speaker on controversies in emergency care of Atrial fibrillation | Jun 2014        | No COI. Bayer markets rivaroxaban; however, neither the thrombophilia guideline panel nor the diagnosis panel is expected to address use of specific anticoagulants. Furthermore, this interest ended before appointment. |
|                |                                                                            |                 |                                                                                                                                                                                                                           |
|                |                                                                            |                 |                                                                                                                                                                                                                           |
|                |                                                                            |                 |                                                                                                                                                                                                                           |

### Industry-Funded Research

4. Do you currently or in the past 24 months have you been involved in research funded or supported (e.g., in kind support) by any for-profit company that develops, produces, markets, or distributes drugs, devices, services, or therapies used to diagnose, treat, monitor, manage, or alleviate health conditions?

No

Yes, as described below:

Column 1 Name the company funding or supporting the research.

Column 2 Briefly describe the research project. Indicate if funding or support goes to you directly or to your institution.

Column 3 Describe your role: (a) national or overall principal investigator, (b) member of a steering committee of a study that does not have a principal investigator, (c) site or local investigator. If other than these options, please describe.

Column 4 Indicate when your involvement ended, if applicable. (If your involvement has not yet ended, indicate “current” or “ongoing.”)

Add rows as needed for each research project.



| <i>Company</i>       | <i>Description of Research</i>                      | <i>My Role</i>    | <i>End Date</i> | <i>For ASH Internal Use</i>                                                                                                                                                                                                                                                                                                                                                                                                      |
|----------------------|-----------------------------------------------------|-------------------|-----------------|----------------------------------------------------------------------------------------------------------------------------------------------------------------------------------------------------------------------------------------------------------------------------------------------------------------------------------------------------------------------------------------------------------------------------------|
| Boehringer Ingelheim | Idarucizimab to reverse Dabigatran-related bleeding | Site investigator | Current         | Not a COI: BI markets dabigatran; however, neither the thrombophilia guideline panel nor the diagnosis panel is expected to address use of specific anticoagulants. Furthermore, Dr. Lang does not have a leadership role in this research, the subject of the research is unrelated to thrombophilia or diagnosis of VTE, and on March 20, 2015, he explained that all funding for research activities goes to his institution. |
|                      |                                                     |                   |                 |                                                                                                                                                                                                                                                                                                                                                                                                                                  |

### My Partner's or Spouse's Interests

5. Currently or in the past 24 months has *your partner or spouse* had any of the interests described in questions 1-4?

No

Yes, as described below:

Add rows as needed for each interest.

| <i>Company</i> | <i>Description</i> | <i>End Date</i> | <i>For ASH Internal Use</i> |
|----------------|--------------------|-----------------|-----------------------------|
|                |                    |                 |                             |
|                |                    |                 |                             |
|                |                    |                 |                             |

## Part B. Interests That Are Not Mainly Financial

You have been invited by ASH to participate in the development of clinical practice guidelines on the following topic(s):

Diagnosis of VTE

Thrombophilia

The questions that follow are designed to elicit information about personal beliefs, intellectual positions or opinions, institutional relationships, and other interests that are not mainly financial and that may be relevant to guidelines on the above topic(s).

### Personal Beliefs

1. Do you have strongly held beliefs related to the topic of these guidelines?

No

Yes

If yes, please explain:

### Previously Published Opinions

2. Have you ever authored, coauthored, or publicly provided an opinion related to the topic of these guidelines, e.g., a clinical practice guideline, textbook, review article, meeting poster or presentation, grand rounds talk, letter to the editor?

No

Yes

If yes, what were those views and where were they made?

### Research

3. Currently or in the past 24 months, have you been involved in a leadership role in any research project not already reported under Part A, Question 4, relevant to the topic of these guidelines, e.g., a research project funded by a nonprofit or governmental organization?

- No
- Yes, as described below:

Column 1 Name the entity funding the research.

Column 2 Describe the research project.

Column 3 Describe your role: (a) national or overall principal investigator, (b) member of a steering committee of a study that does not have a principal investigator, (c) site or local investigator. If other than these options, please describe.

Column 4 Indicate when your involvement ended, if applicable. (If your involvement has not yet ended, indicate “current” or “ongoing.”)

Add rows as needed for each research project.

| <i>Funder</i> | <i>Description of Research</i> | <i>My Role</i> | <i>End Date</i> |
|---------------|--------------------------------|----------------|-----------------|
|               |                                |                |                 |
|               |                                |                |                 |
|               |                                |                |                 |
|               |                                |                |                 |

### Institutional Relationships

4. Do you generate revenues or nonfinancial benefits for your institution by teaching, speaking, consulting, testifying, writing, or otherwise sharing your knowledge or opinions about this guideline topic?

- Don't know
- No
- Yes

If yes, please explain:

5. Could your institution benefit or be harmed by recommendations of guidelines on this topic?

- Don't know
- No
- Yes

If yes, please explain:

## Career Advancement

6. How would you characterize the support you would receive from your primary mentor, institution, or other entities if your work on this panel or authorship of these guidelines generated a strong reaction from peers outside your institution?

Marginally positive or negative – in line with nature of the reactions.

## Advocacy and Policy Positions

7. Do you work for or are you a member of an organization with a stated position related to the topic of these guidelines, e.g., position statement, editorial, blog, amicus brief, or legislature or legal testimony?

No

Yes

If yes, are you involved in formulating or voting for positions?

No

Yes

If yes, could recommendations of these guidelines conflict with policies you have promoted or are obligated to follow?

Don't know or not applicable

No

Yes

If yes, please explain:

## Professional Specialty

8. What is your primary clinical specialty or subspecialty?

Specialty: Family Medicine. Subspecialty: Emergency Medicine.

9. Do you prescribe or otherwise recommend diagnostic tests or treatments that may be addressed by these guidelines?

No

Yes

If yes, please explain:

Unless instructed by an internist or hematologist, I would not investigate for Thrombophilia and VTE.

## Expected Interests

10. Do you expect new financial or nonfinancial interests relevant to the topic of these guidelines not already declared in Part A or Part B of this form?

No

Yes

If yes, please describe:

## Part C. Summary (ASH Internal Use)

ASH will review your disclosures and summarize here interests that are judged to be current, material, and with an affected company. You will then be invited to review our determinations and to agree to make all parts of this form (A, B and C) publically available.

|                            |                                                                         |
|----------------------------|-------------------------------------------------------------------------|
| Name of guideline panel(s) | Guideline Panel on Thrombophilia<br>Guideline Panel on Diagnosis of VTE |
|----------------------------|-------------------------------------------------------------------------|

| <i>Approved to participate?</i> | <i>Status</i>         | <i>Recusal may be required?</i> | <i>Reviewer name and date</i> | <i>Notes</i>                                                   |
|---------------------------------|-----------------------|---------------------------------|-------------------------------|----------------------------------------------------------------|
| Yes                             | Unconflicted majority | No                              | 5/1/2015;<br>5/9/2015         |                                                                |
| Yes                             | Unconflicted majority | No                              | 9/25/2017<br>Alexander        | New disclosures. See Part D.                                   |
| Yes                             | Unconflicted majority | No                              | 7/31/2018<br>Alexander        | On 7/18/2018, Dr. Lang confirmed all information in this form. |
| Yes                             | Unconflicted majority | No                              | 5/21/2020<br>Alexander        | On 5/19/2020, Dr. Lang confirmed all information in this form. |
| Yes                             | Unconflicted majority | No                              | 3/10/2022<br>Alexander        | On 3/4/2022, Dr. Lang confirmed all information in this form.  |
| Yes                             | Unconflicted majority | No                              | 10/11/2022<br>Kunkle          | On 9/13/2022, Dr. Lang confirmed all information in this form. |

If status is conflicted minority, summarize all current material interests in affected companies:

| <i>Company</i> | <i>Description</i> | <i>Disclosure Date</i> | <i>ASH Notes</i> |
|----------------|--------------------|------------------------|------------------|
|                |                    |                        |                  |
|                |                    |                        |                  |

Notes:

|  |
|--|
|  |
|--|

## Part D. New Declarations

The following interests were disclosed after appointment:

| <i>Company</i>             | <i>Description</i>                                        | <i>Disclosure Date</i> | <i>ASH Internal Notes</i>                                                                                  |
|----------------------------|-----------------------------------------------------------|------------------------|------------------------------------------------------------------------------------------------------------|
| American Heart Association | Dr. Lang is no longer a consultant for this organization. | 9/12/2017              | Not a COI. This is an update to Part A, Question 3.                                                        |
| Thrombosis Canada          | Executive Board member                                    | 9/12/2017              | Not a COI. Thrombosis Canada is a non-profit organization and does not market any products related to VTE. |
|                            |                                                           |                        |                                                                                                            |



# ASH Guideline Panel Declarations of Interest Form

## Part A. Material Interests in Companies

### Equity

1. Do you currently or in the past 24 months have you had equity in any for-profit company that develops, produces, markets, or distributes drugs, devices, services, or therapies used to diagnose, treat, monitor, manage, or alleviate health conditions? Equity includes stock, stock options, and other ownership interests but excludes diversified mutual fund shares.

No

Yes, as described below:

Add rows as needed for each equity interest.

| <i>Company</i> | <i>Description</i> | <i>Date Divested</i> | <i>For ASH Internal Use</i> |
|----------------|--------------------|----------------------|-----------------------------|
|                |                    |                      |                             |
|                |                    |                      |                             |

### Patents and Royalties

2. Do you currently or in the past 24 months have you owned patents for or received royalties from any intellectual property or product used to diagnose, treat, monitor, manage, or alleviate health conditions?

No

Yes, as described below:

Add rows as needed for each patent or royalty interest.

| <i>Company</i> | <i>Description</i> | <i>Date Divested</i> | <i>For ASH Internal Use</i> |
|----------------|--------------------|----------------------|-----------------------------|
|                |                    |                      |                             |
|                |                    |                      |                             |



## Personal Income or Other Remuneration

3. Do you currently or in the past 24 months have you received personal income or other remuneration (e.g., reimbursement or financial support for the costs of travel) from any for-profit company that develops, produces, markets, or distributes drugs, devices, services, or therapies used to diagnose, treat, monitor, manage, or alleviate health conditions?

No

Yes, as described below:

Column 1 Name the company.

Column 2 Describe the activity for which you received income or other remuneration, e.g., employment, consultancy, speakers bureau involvement, service on an advisory committee or board, expert testimony.

Column 3 Indicate when the activity ended, if applicable. (If the activity has not yet ended, indicate “current” or “ongoing.”)

Add rows as needed for each activity.

To report activities that generate revenues for your institution, see Part B, Question 4.

| <i>Company</i>                                                                                                                                                                                                                                           | <i>Description</i>                                                                    | <i>End Date</i> | <i>For ASH Internal Use</i>                                                                                      |
|----------------------------------------------------------------------------------------------------------------------------------------------------------------------------------------------------------------------------------------------------------|---------------------------------------------------------------------------------------|-----------------|------------------------------------------------------------------------------------------------------------------|
| OF NOTE: all fees are being paid to our academic research institution and are being used to support research-associated costs; even though contracts on advisory or speaker activities state hourly fees, my salary is not being paid out of these fees. |                                                                                       |                 |                                                                                                                  |
| Aspen                                                                                                                                                                                                                                                    | Unrestricted educational grant for annual Thrombosis Masterclass in The Netherlands   | Current         | Disclosed 10/30/2014. No COI. All fees are paid to Dr. Middeldorp’s institution. No personal income is received. |
| Astra Zeneca                                                                                                                                                                                                                                             | Speaker fee EUR 1400                                                                  | April 2014      | Disclosed 10/30/2014<br>Ended before appointment.                                                                |
| Bayer                                                                                                                                                                                                                                                    | Advisory boards and speakers fees total maximum EUR 4000/year, intermittent contracts | April 2015      | Disclosed 10/30/2014.<br>Ended before appointment.                                                               |

| <i>Company</i>       | <i>Description</i>                                                                   | <i>End Date</i> | <i>For ASH Internal Use</i>                     |
|----------------------|--------------------------------------------------------------------------------------|-----------------|-------------------------------------------------|
| BMS/Pfizer           | Advisory boards and speaker fees total maximum EUR 4000/year, intermittent contracts | September 2014  | Disclosed 10/30/2014. Ended before appointment. |
| Boehringer Ingelheim | Advisory boards and speaker fees total maximum EUR 4000/year, intermittent contracts | September 2014  | Disclosed 10/30/2014. Ended before appointment. |
| Daiichi Sankyo       | Advisory boards and speaker fees total maximum EUR 4000/year, intermittent contracts | March 2015      | Disclosed 10/30/2014. Ended before appointment. |
| GlaxoSmithKline      | Unrestricted educational grant for annual Thrombosis Masterclass in The Netherlands  | March 2013      | Disclosed 10/30/2014. Ended before appointment. |
| GlaxoSmithKline      | Speaker fees 2000 EUR                                                                | June 2013       | Disclosed 10/30/2014. Ended before appointment. |

### Industry-Funded Research

4. Do you currently or in the past 24 months have you been involved in research funded or supported (e.g., in kind support) by any for-profit company that develops, produces, markets, or distributes drugs, devices, services, or therapies used to diagnose, treat, monitor, manage, or alleviate health conditions?

No

Yes, as described below:

Column 1 Name the company funding or supporting the research.

Column 2 Briefly describe the research project. Indicate if funding or support goes to you directly or to your institution.

Column 3 Describe your role: (a) national or overall principal investigator, (b) member of a steering committee of a study that does not have a principal investigator, (c) site or local investigator. If other than these options, please describe.

Column 4 Indicate when your involvement ended, if applicable. (If your involvement has not yet ended, indicate “current” or “ongoing.”)

Add rows as needed for each research project.

| <i>Company</i>           | <i>Description of Research</i>                                                                                                                                                      | <i>My Role</i>                                               | <i>End Date</i> | <i>For ASH Internal Use</i>                                                                                                                                                                                                                                                                                                        |
|--------------------------|-------------------------------------------------------------------------------------------------------------------------------------------------------------------------------------|--------------------------------------------------------------|-----------------|------------------------------------------------------------------------------------------------------------------------------------------------------------------------------------------------------------------------------------------------------------------------------------------------------------------------------------|
| Janssen                  | VTE prevention in medical patients trial. Maximum EUR 4000/year for NL services paid to my institution. Patient recruitment fees paid to my institution. Does not affect my salary. | National Lead (NL) for The Netherlands and site investigator | ongoing         | Janssen markets rivaroxaban. Not a COI for thrombophilia panel: the subject of this research is somewhat related to thrombophilia. However, the guidelines are not expected to address use of specific anticoagulants. Not a COI for pregnancy panel: the subject of this research is not directly related to the guideline topic. |
| Daiichi Sankyo           | VTE treatment trial in VTE patients with cancer. Patient recruitment fees paid to my institution. Does not affect my salary.                                                        | Site investigator                                            | ongoing         | No COI. Daiichi Sankyo markets edoxaban. However, funding goes to Dr. Middeldorp’s institution, and she does not have a leadership role in this research. Furthermore, the thrombophilia chapter is not expected to comment on specific AC, and the topic of research is not within scope of the chapter.                          |
| GSK, taken over by ASPEN | Grant for an investigator-sponsored study “Highlow study:                                                                                                                           | Principal Investigator                                       | ongoing         | Aspen markets danaparoid, and GSK                                                                                                                                                                                                                                                                                                  |

| Company | Description of Research                                                                                                                                                                            | My Role                                  | End Date       | For ASH Internal Use                                                                                                                                                                                                                                                                                                                                                                                       |
|---------|----------------------------------------------------------------------------------------------------------------------------------------------------------------------------------------------------|------------------------------------------|----------------|------------------------------------------------------------------------------------------------------------------------------------------------------------------------------------------------------------------------------------------------------------------------------------------------------------------------------------------------------------------------------------------------------------|
|         | <p>Low-molecular-weight heparin to prevent recurrent VTE in pregnancy: a randomized controlled trial of two doses” NCT (Clinicaltrials.gov) 01828697</p>                                           |                                          |                | <p>markets argotraban and fondaparinux.</p> <p>Not a COI for thrombophilia panel: The subject of the research is not directly related to the guideline topic. Furthermore, the guidelines are not expected to address use of specific anticoagulants.</p> <p><b>COI for VTE in the Context of Pregnancy:</b> GSK is an affected company + leadership role + topic of research within scope of chapter.</p> |
| Portola | <p>Study of Andexanet Alfa in Patients Receiving a Factor Xa Inhibitor who have Acute Major Bleeding. No fees established yet – if any these would go to institution and not affect my salary.</p> | <p>National Lead for The Netherlands</p> | <p>ongoing</p> | <p>Portola is developing an anticoagulant reversal agent.</p> <p>Not a COI for thrombophilia panel: the subject of the research is not directly related to the guideline topic. Furthermore, the guidelines are not expected to address use of reversal agents.</p> <p><b>Potential COI for VTE in the Context of Pregnancy</b> (depends if the chapter addresses management of bleeding).</p>             |

| <i>Company</i>       | <i>Description of Research</i>                                                                                                                                     | <i>My Role</i>       | <i>End Date</i> | <i>For ASH Internal Use</i>                                                                                                                                        |
|----------------------|--------------------------------------------------------------------------------------------------------------------------------------------------------------------|----------------------|-----------------|--------------------------------------------------------------------------------------------------------------------------------------------------------------------|
| Boehringer Ingelheim | REVERSE-AD. Idarucizumab for patients receiving dabigatran who need an antidote. Patient recruitment fees paid to my institution. Does not affect my salary.       | Site investigator or | ongoing         | No COI. Boehringer Ingelheim markets dabigatran. However, funding goes to Dr. Middeldorp's institution, and she does not have a leadership role in this research.  |
| Bayer                | Einstein Choice study, rivaroban vs aspirin for long-term secondary prevention of VTE. Patient recruitment fees paid to my institution. Does not affect my salary. | Site investigator or | ongoing         | No COI. Bayer markets anticoagulants and aspirin. However, funding goes to Dr. Middeldorp's institution, and she does not have a leadership role in this research. |
|                      |                                                                                                                                                                    |                      |                 |                                                                                                                                                                    |

### My Partner's or Spouse's Interests

5. Currently or in the past 24 months has *your partner or spouse* had any of the interests described in questions 1-4?

No

Yes, as described below:

Add rows as needed for each interest.

| <i>Company</i> | <i>Description</i> | <i>End Date</i> | <i>For ASH Internal Use</i> |
|----------------|--------------------|-----------------|-----------------------------|
|                |                    |                 |                             |
|                |                    |                 |                             |
|                |                    |                 |                             |

# Part B. Interests That Are Not Mainly Financial

You have been invited by ASH to participate in the development of clinical practice guidelines on the following topic(s):

| Topic                           | Guideline Panel                                    |
|---------------------------------|----------------------------------------------------|
| Venous thromboembolism (VTE)    | VTE Guideline Coordination Panel                   |
| Thrombophilia                   | Guideline Panel on Thrombophilia                   |
| VTE in the context of pregnancy | Guideline Panel on VTE in the Context of Pregnancy |

The questions that follow are designed to elicit information about personal beliefs, intellectual positions or opinions, institutional relationships, and other interests that are not mainly financial and that may be relevant to guidelines on the above topic(s).

## Personal Beliefs

1. Do you have strongly held beliefs related to the topic of these guidelines?

No

Yes

If yes, please explain:

I have strong opinions that relate to what I disclose and detail under point 2. Otherwise, I strongly believe in evidence-based medicine.

## Previously Published Opinions

2. Have you ever authored, coauthored, or publicly provided an opinion related to the topic of these guidelines, e.g., a clinical practice guideline, textbook, review article, meeting poster or presentation, grand rounds talk, letter to the editor?

No

Yes (Disclosed 12/8/2015)

If yes, what were those views and where were they made?

1) I have a strong, in my view evidence-based opinion about the lack of high quality evidence on women's issues in thrombosis and hemostasis. This is particularly the case for the use of anticoagulants to prevent pregnancy complications, such as recurrent miscarriage, and recurrence of later pregnancy complications.

2) I have been asked to speak in debates on scientific meetings in the Netherlands about the efficacy and safety of NOACs and how this would translate to real life situations, the need (or no need) for antidotes, and so on.

## Research

3. Currently or in the past 24 months, have you been involved in a leadership role in any research project not already reported under Part A, Question 4, relevant to the topic of these guidelines, e.g., a research project funded by a nonprofit or governmental organization?

No

Yes, as described below:

Column 1 Name the entity funding the research.

Column 2 Describe the research project.

Column 3 Describe your role: (a) national or overall principal investigator, (b) member of a steering committee of a study that does not have a principal investigator, (c) site or local investigator. If other than these options, please describe.

Column 4 Indicate when your involvement ended, if applicable. (If your involvement has not yet ended, indicate “current” or “ongoing.”)

Add rows as needed for each research project.

| <i>Funder</i>                                | <i>Description of Research</i>                                                                                                                                                                           | <i>My Role</i>                                                                              | <i>End Date</i> |
|----------------------------------------------|----------------------------------------------------------------------------------------------------------------------------------------------------------------------------------------------------------|---------------------------------------------------------------------------------------------|-----------------|
| French Ministry of Health PHRC National 2014 | Funding for the French participation in Highlow study: Low-molecular-weight heparin to prevent recurrent VTE in pregnancy: a randomized controlled trial of two doses” NCT (Clinicaltrials.gov) 01828697 | I am Principal Investigator of Highlow. The grant has been given to the French coordinators | ongoing         |
| UK NHS NIHR RfPB                             | Funding of the UK participation in ALIFE2 study: Anticoagulants for living fetuses in women with recurrent miscarriage and inherited thrombophilia NTR 3361                                              | I am Principal Investigator of ALIFE2. The grant has been given to the UK coordinators      | ongoing         |

| <i>Funder</i>                                          | <i>Description of Research</i>                                                                                                                                         | <i>My Role</i>                           | <i>End Date</i>        |
|--------------------------------------------------------|------------------------------------------------------------------------------------------------------------------------------------------------------------------------|------------------------------------------|------------------------|
| Netherlands Organisation for Scientific Research (NWO) | VIDI innovative research grant (NWO) 016.126.364. "Thrombophilia and reproduction: mechanisms and targeted interventions". This grant covers in part the ALIFE2 trial. | Personal grant, principal investigator   | Ongoing, end date 2017 |
| Netherlands Heart Foundation                           | CREW (DUTCH NATIONAL CONSORTIUM TO PROMOTE CARDIOVASCULAR HEALTHY AGING IN WOMEN). Development of female-specific prediction tools for VTE                             | Leader of the VTE part in work package 1 | Ongoing, end date 2018 |

## Institutional Relationships

4. Do you generate revenues or nonfinancial benefits for your institution by teaching, speaking, consulting, testifying, writing, or otherwise sharing your knowledge or opinions about this guideline topic?

Don't know

No

Yes

If yes, please explain:

5. Could your institution benefit or be harmed by recommendations of guidelines on this topic?

Don't know

No

Yes

If yes, please explain:



## Career Advancement

6. How would you characterize the support you would receive from your primary mentor, institution, or other entities if your work on this panel or authorship of these guidelines generated a strong reaction from peers outside your institution?

I do not anticipate any strong involvement from the institutions – they would take it as it is and I am confident that they would support any evidence-based contributions regardless of reactions from peers. (Disclosed 12/8/2015)

## Advocacy and Policy Positions

7. Do you work for or are you a member of an organization with a stated position related to the topic of these guidelines, e.g., position statement, editorial, blog, amicus brief, or legislature or legal testimony?

No

Yes

If yes, are you involved in formulating or voting for positions?

No

Yes

If yes, could recommendations of these guidelines conflict with policies you have promoted or are obligated to follow?

Don't know or not applicable

No

Yes

If yes, please explain:

In the Netherlands we have written a letter to get NOACs reimbursed from basic health care insurance for patients with VTE (it is only reimbursed for AF). I have been representative of the Netherlands Society of Internal Medicine in these discussions with several stakeholders (not yet resolved). (Disclosed 12/8/2015)

## Professional Specialty

8. What is your primary clinical specialty or subspecialty?

Vascular Medicine (Disclosed 12/8/2015)

9. Do you prescribe or otherwise recommend diagnostic tests or treatments that may be addressed by these guidelines?

No

Yes (Disclosed 12/8/2015)

If yes, please explain: I am clinically active in the diagnosis, treatment and prevention of VTE.

## Expected Interests

10. Do you expect new financial or nonfinancial interests relevant to the topic of these guidelines not already declared in Part A or Part B of this form?

No

Yes

If yes, please describe: If anything, these would all be in line with what is disclosed. I do not anticipate to take on activities that will yield more financial revenues than already disclosed. Also, I avoid to be dominantly advising for a single company.

## Part C. Summary (ASH Internal Use)

ASH will review your disclosures and summarize here interests that are judged to be current, material, and with an affected company. You will then be invited to review our determinations and to agree to make all parts of this form (A, B and C) publically available.

|                            |                                                  |
|----------------------------|--------------------------------------------------|
| Name of guideline panel(s) | Thrombophilia<br>VTE in the Context of Pregnancy |
|----------------------------|--------------------------------------------------|

| <i>Approved to participate?</i>          | <i>Status</i>         | <i>Recusal may be required?</i> | <i>Reviewer name and date</i> | <i>Notes</i>                                                                                                                                                                                                                                                                                                        |
|------------------------------------------|-----------------------|---------------------------------|-------------------------------|---------------------------------------------------------------------------------------------------------------------------------------------------------------------------------------------------------------------------------------------------------------------------------------------------------------------|
| Yes<br>(Thrombophilia)                   | Unconflicted majority | No                              | 05/08/2015                    | Dr. Middeldorp has recent and current relationships with companies that make anticoagulation products; however, these guidelines are not expected to address use of specific anticoagulants.                                                                                                                        |
| Yes<br>(VTE in the Context of Pregnancy) | Conflicted Minority   | Yes                             | 05/08/2015                    |                                                                                                                                                                                                                                                                                                                     |
| Yes (VTE in the Context of Pregnancy)    | Conflicted minority   |                                 | 5/9/2018                      | Note: On 6/23/2017, FDA approved Portola's betrixaban and on 5/3/2018 FDA approved Portola's adexanet alfa. Dr. Middeldorp's relationship with Portola was previously labeled as a "potential COI". However, DOACs are considered out of scope for this panel, therefore this relationship is not considered a COI. |
| Yes                                      |                       |                                 | 7/3/2018<br>Alexander         | New disclosures. See Part D. Dr. Middeldorp confirmed all information in this form.                                                                                                                                                                                                                                 |
| Yes<br>(Thrombophilia)                   | Unconflicted majority | No                              | 5/21/2020<br>Alexander        | New disclosures. See Part D. On 5/15/2020, Dr. Middeldorp confirmed all information in this form.                                                                                                                                                                                                                   |

|                     |                       |  |                                        |                                                                     |
|---------------------|-----------------------|--|----------------------------------------|---------------------------------------------------------------------|
| Yes (Thrombophilia) | Unconflicted majority |  | 3/10/2022 Alexander                    | On 3/7/2022, Dr. Middeldorp confirmed all information in this form. |
| Yes (Thrombophilia) | Unconflicted majority |  | 10/19/2022 Smith;<br>11/30/2022 Kunkle | New disclosures. See Part D.                                        |

If status is conflicted minority, summarize all current material interests in affected companies:

| <i>Company</i>      | <i>Description</i>                                                                                                                                                                                                                         | <i>Disclosure Date</i> | <i>ASH Notes</i>                                                                                                                                                                                                                                                         |
|---------------------|--------------------------------------------------------------------------------------------------------------------------------------------------------------------------------------------------------------------------------------------|------------------------|--------------------------------------------------------------------------------------------------------------------------------------------------------------------------------------------------------------------------------------------------------------------------|
| GSK (Aspen)         | Principal investigator of “Highlow study: Low-molecular-weight heparin to prevent recurrent VTE in pregnancy: a randomized controlled trial of two doses” NCT (Clinicaltrials.gov) 01828697. All funds go to Dr. Middeldorp’s institution. | 05/08/2015             | This COI is for VTE in the context of pregnancy. Aspen markets danaparoid, and GSK markets argotraban and fondaparinux. All funds go to Dr. Middeldorp’s institution. However, she is the PI, and the subject of this study is directly relevant to the guideline topic. |
| Sanofi South Africa | Direct payment for speaking in September 2017                                                                                                                                                                                              | 7/3/2018               | This COI if for VTE in the Context of Pregnancy. Sanofi markets enoxaparin. This paid activity occurred after the recommendations were drafted.                                                                                                                          |

Notes:

|  |
|--|
|  |
|--|

## Part D. New Declarations

The following interests were disclosed after appointment:

| <i>Company</i>      | <i>Description</i>                                                                         | <i>Disclosure Date</i> | <i>ASH Internal Notes</i>                                                                                                                                                                                                                                                                                                                                                   |
|---------------------|--------------------------------------------------------------------------------------------|------------------------|-----------------------------------------------------------------------------------------------------------------------------------------------------------------------------------------------------------------------------------------------------------------------------------------------------------------------------------------------------------------------------|
| Sanofi South Africa | Direct payment for speaking in September 2017                                              | 7/3/2018               | Not a COI for thrombophilia. Sanofi markets enoxaparin and unfractionated heparin, however these guidelines on Thrombophilia are not expected to address specific anticoagulants. <b>COI for VTE in the Context of Pregnancy.</b> However, this paid activity occurred after the recommendations were drafted.                                                              |
| Daiichi Sankyo      | Research funding for treatment of patients with acute pulmonary embolism. Started in 2017. | 7/3/2018               | Not a COI for thrombophilia. Daiichi Sankyo markets edoxaban, however these guidelines on Thrombophilia are not expected to address specific anticoagulants. Not a COI for VTE in the context of pregnancy. Daiichi Sankyo markets edoxaban, however DOACs were considered out of scope for this guideline. Additionally, all funding goes to Dr. Middeldorp's institution. |
| BMS-Pfizer          | Caravaggio trial for treatment of patients with cancer and VTE. Started in 2018.           | 7/3/2018               | Not a COI for thrombophilia. Pfizer markets dalteparin, however these guidelines on                                                                                                                                                                                                                                                                                         |

| <i>Company</i> | <i>Description</i>                                                                                                                                                                               | <i>Disclosure Date</i> | <i>ASH Internal Notes</i>                                                                                                                                                                                                                                                                                                       |
|----------------|--------------------------------------------------------------------------------------------------------------------------------------------------------------------------------------------------|------------------------|---------------------------------------------------------------------------------------------------------------------------------------------------------------------------------------------------------------------------------------------------------------------------------------------------------------------------------|
|                |                                                                                                                                                                                                  |                        | <p>thrombophilia are not expected to address specific anticoagulants. Not a COI for VTE in the context of pregnancy. Dr. Middeldorp does not have a leadership role, and all funding goes to her institution. This activity occurred after the recommendations were drafted and would not have affected her recusal status.</p> |
| Daiichi Sankyo | <p>Research funding for investigator-initiated research on long-term effects of VTE in the context of the Hokusai VTE trial. Dr. Middeldorp is the PI and reports to the steering committee.</p> | 7/3/2018               | <p>Not a COI for thrombophilia. As above. Not a COI for VTE in the context of pregnancy. As above. Additionally, all funding goes to Dr. Middeldorp's institution, and she does not have a leadership role.</p>                                                                                                                 |
| Bayer          | <p>Unrestricted grant for a DOAC registry, shared decision making and diagnostic management of CTEPJ. Dr. Middeldorp is the PI.</p>                                                              | 7/3/2018               | <p>Not a COI for thrombophilia. Bayer markets rivaroxaban, however these guidelines on thrombophilia are not expected to address specific anticoagulants. Not a COI for VTE in the context of pregnancy. DOACs are considered out of scope. Additionally, all funding goes to Dr. Middeldorp's institution.</p>                 |

| <i>Company</i> | <i>Description</i>                                                                                                                                      | <i>Disclosure Date</i> | <i>ASH Internal Notes</i>                                                                                                                                                    |
|----------------|---------------------------------------------------------------------------------------------------------------------------------------------------------|------------------------|------------------------------------------------------------------------------------------------------------------------------------------------------------------------------|
| Aspen          | Unrestricted educational grant for annual Thrombosis Masterclass in The Netherlands (all fees paid to institution).<br><br>This activity ended in 2016. | 5/15/2020              | Not a COI for thrombophilia. This is an update to Part A, Question 3.                                                                                                        |
| Bayer          | Direct payment for advisory boards and speaking                                                                                                         | 5/15/2020              | Not a COI for thrombophilia. Bayer markets rivaroxaban, however, these guidelines on thrombophilia will not address use of specific anticoagulants.                          |
| BMS/Pfizer     | Direct payments for advisory boards and speaking                                                                                                        | 5/15/2020              | Not a COI for thrombophilia. BMS markets apixaban and Pfizer markets dalteparin, however, these guidelines on thrombophilia will not address use of specific anticoagulants. |
| Daiichi Sankyo | Direct payments for advisory boards and speaking                                                                                                        | 5/15/2020              | Not a COI for thrombophilia. Daiichi Sankyo markets edoxaban, however, these guidelines on thrombophilia will not address use of specific anticoagulants.                    |
| Portola        | Honoraria for attending investigator meetings and speakers fees                                                                                         | 5/15/2020              | Not a COI for thrombophilia. Portoloa markets betrixaban and andexanet alfa, however, these guidelines on thrombophilia will not                                             |

| <i>Company</i>           | <i>Description</i>                                                                                                                                                                                                      | <i>Disclosure Date</i> | <i>ASH Internal Notes</i>                                                                                                                                      |
|--------------------------|-------------------------------------------------------------------------------------------------------------------------------------------------------------------------------------------------------------------------|------------------------|----------------------------------------------------------------------------------------------------------------------------------------------------------------|
|                          |                                                                                                                                                                                                                         |                        | address use of specific anticoagulants.                                                                                                                        |
| AbbVie                   | Honoraria for adjudication committees                                                                                                                                                                                   | 5/15/2020              | Not a COI for thrombophilia. AbbVie does not market any drugs or devices use in the diagnosis or treatment of VTE.                                             |
| Sanofi                   | Honoraria for speaking                                                                                                                                                                                                  | 5/15/2020              | Not a COI for thrombophilia. Sanofi market unfractionated heparin, however, these guidelines on thrombophilia will not address use of specific anticoagulants. |
| Janssen                  | VTE prevention in medical patients trial. Maximum EUR 4000/year for NL services paid to my institution. Patient recruitment fees paid to my institution. Does not affect my salary.<br><br>This activity ended in 2018. | 5/15/2020              | Not a COI. This is an update to Part A, Question 4.                                                                                                            |
| Daiichi Sankyo           | VTE treatment trial in VTE patients with cancer.<br><br>This activity ended in 2019.                                                                                                                                    | 5/15/2020              | Not a COI. This is an update to Part A, Question 4.                                                                                                            |
| GSK, taken over by ASPEN | Grant for an investigator-sponsored study "Highlow study: Low-molecular-weight heparin to prevent recurrent VTE in pregnancy: a                                                                                         | 5/15/2020              | Not a COI. This is an update to Part A, Question 4.                                                                                                            |



| <i>Company</i>       | <i>Description</i>                                                                                                                            | <i>Disclosure Date</i> | <i>ASH Internal Notes</i>                                                                                                                           |
|----------------------|-----------------------------------------------------------------------------------------------------------------------------------------------|------------------------|-----------------------------------------------------------------------------------------------------------------------------------------------------|
|                      | <p>randomized controlled trial of two doses”</p> <p>This activity ended in 2018.</p>                                                          |                        |                                                                                                                                                     |
| Portola              | <p>Study of Andexanet Alfa in Patients Receiving a Factor Xa Inhibitor who have Acute Major Bleeding.</p> <p>This activity ended in 2018.</p> | 5/15/2020              | Not a COI. This is an update to Part A, Question 4.                                                                                                 |
| Boehringer Ingelheim | <p>REVERSE-AD. Idarucizumab for patients receiving dabigatran who need an antidote.</p> <p>This activity ended in 2016.</p>                   | 5/15/2020              | Not a COI. This is an update to Part A, Question 4.                                                                                                 |
| Bayer                | <p>Einstein Choice study, rivaroban vs aspirin for long-term secondary prevention of VTE.</p> <p>This activity ended in 2017.</p>             | 5/15/2020              | Not a COI. This is an update to Part A, Question 4.                                                                                                 |
| Bayer                | <p>Unrestricted grant support for use of anticoagulants in special situations.</p>                                                            | 5/15/2020              | Not a COI for thrombophilia. Bayer markets rivaroxaban, however, these guidelines on thrombophilia will not address use of specific anticoagulants. |
| Daiichi Sankyo       | <p>Unrestricted grant support for long term outcomes of patients treated with edoxaban or VKA</p>                                             | 5/15/2020              | Not a COI for thrombophilia. Daiichi Sankyo markets edoxaban, however, these guidelines on                                                          |

| <i>Company</i>               | <i>Description</i>                                                                                             | <i>Disclosure Date</i> | <i>ASH Internal Notes</i>                                                                                                                                           |
|------------------------------|----------------------------------------------------------------------------------------------------------------|------------------------|---------------------------------------------------------------------------------------------------------------------------------------------------------------------|
|                              |                                                                                                                |                        | thrombophilia will not address use of specific anticoagulants.                                                                                                      |
|                              | In January 2021, Dr. Middeldorp changed institutions: from Amsterdam UMC to Radboud University/Radboudumc.     | 10/15/2022             |                                                                                                                                                                     |
| Viatrix                      | Speaker fees in November 2021 (1400 EUR)                                                                       | 10/15/2022             | Not a COI. Viatrix does not market any products for thrombophilia testing or VTE treatment.                                                                         |
| Norgine                      | Speaker fees in July 2022 (2500 EUR)                                                                           | 10/15/2022             | Norgine markets acenocoumarol, an anticoagulant. However, these guidelines on thrombophilia testing do not address use of specific anticoagulants.                  |
| Sanofi                       | Speaker fees in October 2022 (1012 EUR)                                                                        | 10/15/2022             | Sanofi markets enoxaparin, an anticoagulant. However, these guidelines on thrombophilia testing do not address use of specific anticoagulants.                      |
| Sanofi                       | Speaker fees in December 2022 (1500 EUR)                                                                       | 10/15/2022             | See above.                                                                                                                                                          |
| Astra Zeneca/Alexion/Portola | Steering Committee ANNEXA-4 and ANNEXA-1 studies. All fees paid to my institution and do not affect my salary. | 10/15/2022             | These companies market various anticoagulants or reversal agents. However, these guidelines on thrombophilia testing do not address use of specific anticoagulants. |

| <i>Company</i>       | <i>Description</i>                                                                                                                                                                                                            | <i>Disclosure Date</i> | <i>ASH Internal Notes</i>                                                                                                                                                                                                   |
|----------------------|-------------------------------------------------------------------------------------------------------------------------------------------------------------------------------------------------------------------------------|------------------------|-----------------------------------------------------------------------------------------------------------------------------------------------------------------------------------------------------------------------------|
|                      |                                                                                                                                                                                                                               |                        | Furthermore, these studies of reversal of anticoagulation are unrelated to thrombophilia testing.                                                                                                                           |
| Boehringer Ingelheim | Principle Investigator from 2022 onward; support for the investigator-initiated MEDEA study, a RCT of switching FXa inhibitor to dabigatran or addition of tranexamic acid. Paid to Amsterdam UMC, does not affect my salary. | 10/15/2022             | Boehringer Ingelheim markets dabigatran, an anticoagulant. However, these guidelines on thrombophilia testing do not address use of specific anticoagulants. Furthermore, this study is unrelated to thrombophilia testing. |
| Daiichi Sankyo       | Principle Investigator in 2021; investigator-initiated long-term follow up study of patients treated with edoxaban or VKA. Paid to Amsterdam UMC, does not affect my salary.                                                  | 10/15/2022             | Daiichi Sankyo markets edoxaban, an anticoagulant. However, these guidelines on thrombophilia testing do not address use of specific anticoagulants. Furthermore, this study is unrelated to thrombophilia testing.         |
| Pfizer               | Principle Investigator in 2021; support for the investigator-initiated Highlow study. Paid to Amsterdam UMC, does not affect my salary.                                                                                       | 10/15/2022             | Pfizer markets the anticoagulants apixaban and dalteparin. However, these guidelines on thrombophilia will not address use of specific anticoagulants. Furthermore, this study is unrelated to thrombophilia testing.       |



# ASH Guideline Panel Declarations of Interest Form

## Part A. Material Interests in Companies

### Equity

1. Do you currently or in the past 24 months have you had equity in any for-profit company that develops, produces, markets, or distributes drugs, devices, services, or therapies used to diagnose, treat, monitor, manage, or alleviate health conditions? Equity includes stock, stock options, and other ownership interests but excludes diversified mutual fund shares.

No

Yes, as described below:

Add rows as needed for each equity interest.

| <i>Company</i> | <i>Description</i> | <i>Date Divested</i> | <i>For ASH Internal Use</i> |
|----------------|--------------------|----------------------|-----------------------------|
|                |                    |                      |                             |
|                |                    |                      |                             |

### Patents and Royalties

2. Do you currently or in the past 24 months have you owned patents for or received royalties from any intellectual property or product used to diagnose, treat, monitor, manage, or alleviate health conditions?

No

Yes, as described below:

Add rows as needed for each patent or royalty interest.

| <i>Company</i> | <i>Description</i> | <i>Date Divested</i> | <i>For ASH Internal Use</i> |
|----------------|--------------------|----------------------|-----------------------------|
|                |                    |                      |                             |
|                |                    |                      |                             |

## Personal Income or Other Remuneration

3. Do you currently or in the past 24 months have you received personal income or other remuneration (e.g., reimbursement or financial support for the costs of travel) from any for-profit company that develops, produces, markets, or distributes drugs, devices, services, or therapies used to diagnose, treat, monitor, manage, or alleviate health conditions?

No

Yes, as described below:

Column 1 Name the company.

Column 2 Describe the activity for which you received income or other remuneration, e.g., employment, consultancy, speakers bureau involvement, service on an advisory committee or board, expert testimony.

Column 3 Indicate when the activity ended, if applicable. (If the activity has not yet ended, indicate "current" or "ongoing.")

Add rows as needed for each activity.

To report activities that generate revenues for your institution, see Part B, Question 4.

| <i>Company</i> | <i>Description</i>    | <i>End Date</i> | <i>For ASH Internal Use</i>                                                                                                                                                                                                    |
|----------------|-----------------------|-----------------|--------------------------------------------------------------------------------------------------------------------------------------------------------------------------------------------------------------------------------|
| Portola        | Consulting honorarium | 12/5/2015       | Portola is developing an anticoagulation reversal agent (andexanet); however, these guidelines on thrombophilia are not expected to address use of specific anticoagulants.                                                    |
| CSL Behring    | Consulting honorarium | 12/17/2013      | CSL Behring markets Kcentra, which is used for warfarin reversal. However, these guidelines are not expected to address use of specific anticoagulants or reversal agents. Furthermore, the interest ended before appointment. |
| Stago          | Consulting honorarium | 11/13/2013      | Stago Diagnostics markets D-dimer kits. However, this interest ended before appointment.                                                                                                                                       |
| Daiichi        | Consulting honorarium | 9/21/2013       | Daiichi Sankyo markets edoxaban; however, these guidelines are not expected to address use of specific anticoagulants. Furthermore, this interest ended before appointment.                                                    |

## Industry-Funded Research

4. Do you currently or in the past 24 months have you been involved in research funded or supported (e.g., in kind support) by any for-profit company that develops, produces, markets, or distributes drugs, devices, services, or therapies used to diagnose, treat, monitor, manage, or alleviate health conditions?

No

Yes, as described below:

Column 1 Name the company funding or supporting the research.

Column 2 Briefly describe the research project. Indicate if funding or support goes to you directly or to your institution.

Column 3 Describe your role: (a) national or overall principal investigator, (b) member of a steering committee of a study that does not have a principal investigator, (c) site or local investigator. If other than these options, please describe.

Column 4 Indicate when your involvement ended, if applicable. (If your involvement has not yet ended, indicate “current” or “ongoing.”)

Add rows as needed for each research project.

| <i>Company</i> | <i>Description of Research</i>                                                                            | <i>My Role</i>         | <i>End Date</i> | <i>For ASH Internal Use</i>                                                                                                                                                                                                                                            |
|----------------|-----------------------------------------------------------------------------------------------------------|------------------------|-----------------|------------------------------------------------------------------------------------------------------------------------------------------------------------------------------------------------------------------------------------------------------------------------|
| Portola        | Phase 3 multicenter trial on reversal of antiXa anticoagulants; clinicaltrials.gov: NCT02329327           | Local PI at Univ of NC | 12/2017         | Portola is developing an anticoagulation reversal agent (andexanet); however, these guidelines on thrombophilia are not expected to address use of specific anticoagulants or reversal agents. Furthermore, Dr. Moll does not have a leadership role in this research. |
| Daiichi        | Phase 4 multicenter trial of use of Edoxaban in cancer patients with DVT. clinicaltrials.gov: NCT02073682 | Local PI at Univ of NC | 12/2018         | Daiichi Sankyo markets edoxaban; however, these guidelines are not expected to address use of specific anticoagulants.                                                                                                                                                 |

| <i>Company</i>       | <i>Description of Research</i>                                            | <i>My Role</i>         | <i>End Date</i> | <i>For ASH Internal Use</i>                                                                                                                                                                            |
|----------------------|---------------------------------------------------------------------------|------------------------|-----------------|--------------------------------------------------------------------------------------------------------------------------------------------------------------------------------------------------------|
|                      |                                                                           |                        |                 | Furthermore, Dr. Moll does not have a leadership role in this research.                                                                                                                                |
| Boehringer-Ingelheim | Reversal of dabigatran with idarucizumab; clinicaltrials.gov: NCT02104947 | Local PI at Univ of NC | 12/2017         | Boehringer-Ingelheim markets dabigatran; however, these guidelines are not expected to address use of specific anticoagulants. Furthermore, Dr. Moll does not have a leadership role in this research. |
|                      |                                                                           |                        |                 |                                                                                                                                                                                                        |
|                      |                                                                           |                        |                 |                                                                                                                                                                                                        |

### My Partner's or Spouse's Interests

5. Currently or in the past 24 months has *your partner or spouse* had any of the interests described in questions 1-4?

No

Yes, as described below:

Add rows as needed for each interest.

| <i>Company</i> | <i>Description</i> | <i>End Date</i> | <i>For ASH Internal Use</i> |
|----------------|--------------------|-----------------|-----------------------------|
|                |                    |                 |                             |
|                |                    |                 |                             |
|                |                    |                 |                             |

## Part B. Interests That Are Not Mainly Financial

You have been invited by ASH to participate in the development of clinical practice guidelines on the following topic(s):

Thrombophilia

The questions that follow are designed to elicit information about personal beliefs, intellectual positions or opinions, institutional relationships, and other interests that are not mainly financial and that may be relevant to guidelines on the above topic(s).

### Personal Beliefs

1. Do you have strongly held beliefs related to the topic of these guidelines?

No

Yes

If yes, please explain:

### Previously Published Opinions

2. Have you ever authored, coauthored, or publicly provided an opinion related to the topic of these guidelines, e.g., a clinical practice guideline, textbook, review article, meeting poster or presentation, grand rounds talk, letter to the editor?

No

Yes

If yes, what were those views and where were they made?

Balanced review of the topic with clinical practical conclusions. Published: Moll S. Thrombophilia: clinical-practical aspects. *J Thromb Thrombolysis*. 2015 Apr; 39(3):367-78. doi: 10.1007/s11239-015-1197-3.

Ongoing "Thrombophilia testing" guidance document development (I am the lead author of the thrombophilia chapter) by the *Anticoagulation Forum*; project headed by Dr. Jack Ansell; goal: publication 2015/2016 in *J Thromb Thrombolysis*.



## Research

3. Currently or in the past 24 months, have you been involved in a leadership role in any research project not already reported under Part A, Question 4, relevant to the topic of these guidelines, e.g., a research project funded by a nonprofit or governmental organization?

- No  
 Yes, as described below:

Column 1 Name the entity funding the research.

Column 2 Describe the research project.

Column 3 Describe your role: (a) national or overall principal investigator, (b) member of a steering committee of a study that does not have a principal investigator, (c) site or local investigator. If other than these options, please describe.

Column 4 Indicate when your involvement ended, if applicable. (If your involvement has not yet ended, indicate “current” or “ongoing.”)

Add rows as needed for each research project.

| <i>Funder</i> | <i>Description of Research</i> | <i>My Role</i> | <i>End Date</i> |
|---------------|--------------------------------|----------------|-----------------|
|               |                                |                |                 |
|               |                                |                |                 |
|               |                                |                |                 |
|               |                                |                |                 |

## Institutional Relationships

4. Do you generate revenues or nonfinancial benefits for your institution by teaching, speaking, consulting, testifying, writing, or otherwise sharing your knowledge or opinions about this guideline topic?

- Don't know  
 No  
 Yes

If yes, please explain:

5. Could your institution benefit or be harmed by recommendations of guidelines on this topic?

- Don't know

No

Yes

If yes, please explain:

## Career Advancement

6. How would you characterize the support you would receive from your primary mentor, institution, or other entities if your work on this panel or authorship of these guidelines generated a strong reaction from peers outside your institution?

Supportive. I don't foresee a problem.

## Advocacy and Policy Positions

7. Do you work for or are you a member of an organization with a stated position related to the topic of these guidelines, e.g., position statement, editorial, blog, amicus brief, or legislature or legal testimony?

No

Yes

If yes, are you involved in formulating or voting for positions?

No

Yes

If yes, could recommendations of these guidelines conflict with policies you have promoted or are obligated to follow?

Don't know or not applicable

No

Yes

If yes, please explain:

## Professional Specialty

8. What is your primary clinical specialty or subspecialty?  
Hematology-Coagulation - Thrombosis

9. Do you prescribe or otherwise recommend diagnostic tests or treatments that may be addressed by these guidelines?

No

Yes

If yes, please explain:

I, as many other hematologists, order thrombophilia tests on a frequent basis and are part of my routine clinical practice. That's why these thrombophilia guidelines are being developed by ASH. Therefore, the guidelines will have an impact on my diagnostic testing pattern. After all, that's the purpose of guidelines.

## Expected Interests

10. Do you expect new financial or nonfinancial interests relevant to the topic of these guidelines not already declared in Part A or Part B of this form?

No

Yes

If yes, please describe:

## Part C. Summary (ASH Internal Use)

ASH will review your disclosures and summarize here interests that are judged to be current, material, and with an affected company. You will then be invited to review our determinations and to agree to make all parts of this form (A, B and C) publically available.

|                            |                                  |
|----------------------------|----------------------------------|
| Name of guideline panel(s) | Guideline Panel on Thrombophilia |
|----------------------------|----------------------------------|

| <i>Approved to participate?</i> | <i>Status</i>           | <i>Recusal may be required?</i> | <i>Reviewer name and date</i>          | <i>Notes</i>                                                                                                                                               |
|---------------------------------|-------------------------|---------------------------------|----------------------------------------|------------------------------------------------------------------------------------------------------------------------------------------------------------|
| Yes                             | Unconflicted majority   | No                              | 5/1/15; 5/9/15                         | Dr. Moll has some financial relationships with anticoagulant manufacturers; however, these guidelines are not expected to address specific anticoagulants. |
| Yes                             | Unconflicted majority   | No                              | 10/13/16 Alexander;<br>10/26/16 Kunkle | New interests disclosed. See Part D.                                                                                                                       |
| Yes                             | Unconflicted majority   | No                              | 3/20/17 Alexander;<br>3/24/17 Kunkle   | New interest disclosed. See Part D.                                                                                                                        |
| Yes                             | Conflicted minority     | Yes                             | 5/22/2020 Alexander                    | New interest disclosed. See Part D.                                                                                                                        |
| Yes                             | Conflicted minority     | Yes                             | 3/10/2022 Alexander                    | New interests disclosed. See Part D.                                                                                                                       |
| Yes                             | Minority with conflicts | Yes                             | 10/18/2022 Kunkle, Smith               | Dr. Moll clarified dates of previously disclosed paid consulting. See Part D. He also confirmed all other information in this form.                        |

If status is conflicted minority, summarize all current material interests in affected companies:

| <i>Company</i>    | <i>Description</i>            | <i>Disclosure Date</i> | <i>ASH Notes</i>                                     |
|-------------------|-------------------------------|------------------------|------------------------------------------------------|
| Stago Diagnostica | Direct payment for consulting | 5/21/2020              | COI. Stago Diagnostica markets thrombophilia assays. |
|                   |                               |                        |                                                      |

| <i>Company</i> | <i>Description</i> | <i>Disclosure Date</i> | <i>ASH Notes</i> |
|----------------|--------------------|------------------------|------------------|
|                |                    |                        |                  |
|                |                    |                        |                  |

Notes:

|  |
|--|
|  |
|--|

## Part D. New Declarations

The following interests were disclosed after appointment:

| <i>Company</i>       | <i>Description</i>                        | <i>Disclosure Date</i> | <i>ASH Internal Notes</i>                                                                                                                                                                      |
|----------------------|-------------------------------------------|------------------------|------------------------------------------------------------------------------------------------------------------------------------------------------------------------------------------------|
| Boehringer-Ingelheim | Direct payment for consulting (4/28/2016) | 9/22/16                | Boehringer-Ingelheim markets dabigatran; however, these guidelines are not expected to address use of specific anticoagulants.                                                                 |
| Janssen              | Direct payment for consulting (9/6/2018)  | 9/22/16                | Janssen markets rivaroxaban; however, these guidelines are not expected to address use of specific anticoagulants.                                                                             |
| Portola              | Direct payment for consulting (2/11/2017) | 03/20/17               | Portola is developing an anticoagulation reversal agent (andexanet); however, these guidelines on thrombophilia are not expected to address use of specific anticoagulants or reversal agents. |
| Stago Diagnostica    | Direct payment for consulting             | 5/21/2020              | COI. Stago Diagnostica markets thrombophilia assay tests.                                                                                                                                      |
| Pfizer               | Direct payment for consulting (8/18/2016) | 10/5/2022              | Pfizer/BMS markets apixaban; however,                                                                                                                                                          |

| <i>Company</i>       | <i>Description</i>                         | <i>Disclosure Date</i> | <i>ASH Internal Notes</i>                                                                                          |
|----------------------|--------------------------------------------|------------------------|--------------------------------------------------------------------------------------------------------------------|
|                      |                                            |                        | these guidelines will not address use of specific anticoagulants.                                                  |
| Grifols              | Direct payment for consulting (11/27/2017) | 10/5/2022              | Grifols markets antithrombin concentrate.                                                                          |
| Janssen              | Direct payment for consulting (9/6/2018)   | 10/5/2022              | Janssen markets rivaroxaban; however, these guidelines are not expected to address use of specific anticoagulants. |
| Bristol-Myers Squibb | Direct payment for consulting (9/23/2021)  | 10/5/2022              | Pfizer/BMS markets apixaban; however, these guidelines will not address use of specific anticoagulants.            |



# ASH Guideline Panel Declarations of Interest Form

## Part A. Material Interests in Companies

### Equity

1. Do you currently or in the past 24 months have you had equity in any for-profit company that develops, produces, markets, or distributes drugs, devices, services, or therapies used to diagnose, treat, monitor, manage, or alleviate health conditions? Equity includes stock, stock options, and other ownership interests but excludes diversified mutual fund shares.

No

Yes, as described below:

Add rows as needed for each equity interest.

| <i>Company</i> | <i>Description</i> | <i>Date Divested</i> | <i>For ASH Internal Use</i> |
|----------------|--------------------|----------------------|-----------------------------|
|                |                    |                      |                             |
|                |                    |                      |                             |
|                |                    |                      |                             |
|                |                    |                      |                             |

### Patents and Royalties

2. Do you currently or in the past 24 months have you owned patents for or received royalties from any intellectual property or product used to diagnose, treat, monitor, manage, or alleviate health conditions?

No

Yes, as described below:

Add rows as needed for each patent or royalty interest.





## Industry-Funded Research

4. Do you currently or in the past 24 months have you been involved in research funded or supported (e.g., in kind support) by any for-profit company that develops, produces, markets, or distributes drugs, devices, services, or therapies used to diagnose, treat, monitor, manage, or alleviate health conditions?

No

Yes, as described below:

Column 1 Name the company funding or supporting the research.

Column 2 Briefly describe the research project. Indicate if funding or support goes to you directly or to your institution.

Column 3 Describe your role: (a) national or overall principal investigator, (b) member of a steering committee of a study that does not have a principal investigator, (c) site or local investigator. If other than these options, please describe.

Column 4 Indicate when your involvement ended, if applicable. (If your involvement has not yet ended, indicate “current” or “ongoing.”)

Add rows as needed for each research project.

| <i>Company</i> | <i>Description of Research</i> | <i>My Role</i> | <i>End Date</i> | <i>For ASH Internal Use</i> |
|----------------|--------------------------------|----------------|-----------------|-----------------------------|
|                |                                |                |                 |                             |
|                |                                |                |                 |                             |
|                |                                |                |                 |                             |
|                |                                |                |                 |                             |
|                |                                |                |                 |                             |
|                |                                |                |                 |                             |
|                |                                |                |                 |                             |
|                |                                |                |                 |                             |
|                |                                |                |                 |                             |

## My Partner’s or Spouse’s Interests

5. Currently or in the past 24 months has *your partner or spouse* had any of the interests described in questions 1-4?

No

Yes, as described below:

Add rows as needed for each interest.

| <i>Company</i> | <i>Description</i> | <i>End Date</i> | <i>For ASH Internal Use</i> |
|----------------|--------------------|-----------------|-----------------------------|
|                |                    |                 |                             |
|                |                    |                 |                             |
|                |                    |                 |                             |

# Part B. Interests That Are Not Mainly Financial

You have been invited by ASH to participate in the development of clinical practice guidelines on the following topic(s):

Optimal Management of Anticoagulation Therapy

The questions that follow are designed to elicit information about personal beliefs, intellectual positions or opinions, institutional relationships, and other interests that are not mainly financial and that may be relevant to guidelines on the above topic(s).

## Personal Beliefs

1. Do you have strongly held beliefs related to the topic of these guidelines?

No

Yes

If yes, please explain:

## Previously Published Opinions

2. Have you ever authored, coauthored, or publicly provided an opinion related to the topic of these guidelines, e.g., a clinical practice guideline, textbook, review article, meeting poster or presentation, grand rounds talk, letter to the editor?

No

Yes

If yes, what were those views and where were they made?

## Research

3. Currently or in the past 24 months, have you been involved in a leadership role in any research project not already reported under Part A, Question 4, relevant to the topic of these guidelines, e.g., a research project funded by a nonprofit or governmental organization?

No

Yes, as described below:

Column 1 Name the entity funding the research.

Column 2 Describe the research project.

Column 3 Describe your role: (a) national or overall principal investigator, (b) member of a steering committee of a study that does not have a principal investigator, (c) site or local investigator. If other than these options, please describe.

Column 4 Indicate when your involvement ended, if applicable. (If your involvement has not yet ended, indicate “current” or “ongoing.”)

Add rows as needed for each research project.

| <i>Funder</i> | <i>Description of Research</i> | <i>My Role</i> | <i>End Date</i> |
|---------------|--------------------------------|----------------|-----------------|
|               |                                |                |                 |
|               |                                |                |                 |
|               |                                |                |                 |
|               |                                |                |                 |

### Institutional Relationships

4. Do you generate revenues or nonfinancial benefits for your institution by teaching, speaking, consulting, testifying, writing, or otherwise sharing your knowledge or opinions about this guideline topic?

Don't know

No

Yes

If yes, please explain:

5. Could your institution benefit or be harmed by recommendations of guidelines on this topic?

Don't know

No

Yes

If yes, please explain:

## Career Advancement

6. How would you characterize the support you would receive from your primary mentor, institution, or other entities if your work on this panel or authorship of these guidelines generated a strong reaction from peers outside your institution?

The company I work for would be pleased to see the research and development that this program will produce. They value all aspects of health & safety and would support me in this health related panel.

## Advocacy and Policy Positions

7. Do you work for or are you a member of an organization with a stated position related to the topic of these guidelines, e.g., position statement, editorial, blog, amicus brief, or legislature or legal testimony?

No

Yes

If yes, are you involved in formulating or voting for positions?

No

Yes

If yes, could recommendations of these guidelines conflict with policies you have promoted or are obligated to follow?

Don't know or not applicable

No

Yes

If yes, please explain:

## Professional Specialty

8. What is your primary clinical specialty or subspecialty?

I don't have a clinical specialty.

9. Do you prescribe or otherwise recommend diagnostic tests or treatments that may be addressed by these guidelines?

No

Yes

If yes, please explain:

## Expected Interests

10. Do you expect new financial or nonfinancial interests relevant to the topic of these guidelines not already declared in Part A or Part B of this form?

No

Yes

If yes, please describe:

## Part C. Summary (ASH Internal Use)

ASH will review your disclosures and summarize here interests that are judged to be current, material, and with an affected company. You will then be invited to review our determinations and to agree to make all parts of this form (A, B and C) publically available.

|                            |                                               |
|----------------------------|-----------------------------------------------|
| Name of guideline panel(s) | Optimal Management of Anticoagulation Therapy |
|----------------------------|-----------------------------------------------|

| <i>Approved to participate?</i> | <i>Status</i>         | <i>Recusal may be required?</i> | <i>Reviewer Name and Date</i> | <i>Notes</i>                                                    |
|---------------------------------|-----------------------|---------------------------------|-------------------------------|-----------------------------------------------------------------|
| Yes                             | Unconflicted majority | No                              | 9/24/15;<br>9/25/15           |                                                                 |
| Yes                             | Unconflicted majority | No                              | 7/2/2018<br>Alexander         | On 6/29/2018, Ms. Myers confirmed all information in this form. |
| Yes                             | Unconflicted majority | No                              | 5/5/2020<br>Alexander         | On 5/1/2020, Ms. Myers confirmed all information in this form.  |
| Yes                             | Unconflicted majority | No                              | 3/10/2022<br>Alexander        | On 3/3/2022, Ms. Myers confirmed all information in this form.  |
| Yes                             | Unconflicted majority | No                              | 10/11/2022<br>Kunkle          | On 9/30/2022, Ms. Myers confirmed all information in this form. |

If status is conflicted minority, summarize all current material interests in affected companies:

| <i>Company</i> | <i>Description</i> | <i>Disclosure Date</i> | <i>ASH Notes</i> |
|----------------|--------------------|------------------------|------------------|
|                |                    |                        |                  |
|                |                    |                        |                  |
|                |                    |                        |                  |
|                |                    |                        |                  |

Notes:

|  |
|--|
|  |
|--|
