# Supplementary material for: American Society of Hematology 2023 guidelines for management of venous thromboembolism: thrombophilia testing
Source: PubMed Central journal article supplement — Blood Adv. 2023 May 24;7(22):7101–38. doi: 10.1182/bloodadvances.2023010177 (PMC10709681; doi:10.1182/bloodadvances.2023010177), 2023-05-24
Supplement: BLOODA_ADV-2023-010177-C-mmc4.pdf [file BLOODA_ADV-2023-010177-C-mmc4.pdf]

## Supplement - Search Strategies

### Systematic reviews on thrombophilia testing:

|                                      |                                                                                                                                                                                                                                                                                                                                                                                                                                                                        |
|--------------------------------------|------------------------------------------------------------------------------------------------------------------------------------------------------------------------------------------------------------------------------------------------------------------------------------------------------------------------------------------------------------------------------------------------------------------------------------------------------------------------|
| Database:                            | Ovid MEDLINE(R) Epub Ahead of Print, In-Process & Other Non-Indexed Citations, Ovid MEDLINE(R) Daily, Ovid MEDLINE and Versions(R) <1946 to present>                                                                                                                                                                                                                                                                                                                   |
| Date most recent search:             | 22-MAY-2018                                                                                                                                                                                                                                                                                                                                                                                                                                                            |
| Interface:                           | Ovid                                                                                                                                                                                                                                                                                                                                                                                                                                                                   |
| <b>Search Strategy: search terms</b> |                                                                                                                                                                                                                                                                                                                                                                                                                                                                        |
| 1                                    | exp Thrombophilia/                                                                                                                                                                                                                                                                                                                                                                                                                                                     |
| 2                                    | Activated Protein C Resistance/                                                                                                                                                                                                                                                                                                                                                                                                                                        |
| 3                                    | Antithrombin III Deficiency/                                                                                                                                                                                                                                                                                                                                                                                                                                           |
| 4                                    | protein c deficiency/                                                                                                                                                                                                                                                                                                                                                                                                                                                  |
| 5                                    | Protein S Deficiency/                                                                                                                                                                                                                                                                                                                                                                                                                                                  |
| 6                                    | exp Factor VIII/                                                                                                                                                                                                                                                                                                                                                                                                                                                       |
| 7                                    | exp Antibodies, Antiphospholipid/                                                                                                                                                                                                                                                                                                                                                                                                                                      |
| 8                                    | prothrombin/                                                                                                                                                                                                                                                                                                                                                                                                                                                           |
| 9                                    | beta 2-Glycoprotein I/                                                                                                                                                                                                                                                                                                                                                                                                                                                 |
| 10                                   | "Methylenetetrahydrofolate Reductase (NADPH2)"/                                                                                                                                                                                                                                                                                                                                                                                                                        |
| 11                                   | ((prothrombin adj (G20210A or "20210")) or (protein C adj (deficienc\$ or resistance)) or protein S deficienc\$ or ((antithrombin or anti thrombin) adj deficienc\$) or (factor adj (VIII or V leiden or II leiden or II G20210A)) or (lupus adj (coagulation inhibitor or anticoagulant)) or (antibod\$ adj1 (antiphospholipid or anticardiolipin)) or at III or apc resistance or anti-beta2 glycoprotein or Methylenetetrahydrofolate reductase or mthfr).ti,ab,kw. |
| 12                                   | (thrombophil* or hypercoagul*).mp.                                                                                                                                                                                                                                                                                                                                                                                                                                     |
| 13                                   | or/1-12                                                                                                                                                                                                                                                                                                                                                                                                                                                                |
| 14                                   | exp Mass Screening/                                                                                                                                                                                                                                                                                                                                                                                                                                                    |
| 15                                   | "diagnostic techniques and procedures"/                                                                                                                                                                                                                                                                                                                                                                                                                                |
| 16                                   | diagnostic tests, routine/                                                                                                                                                                                                                                                                                                                                                                                                                                             |
| 17                                   | Genetic Testing/                                                                                                                                                                                                                                                                                                                                                                                                                                                       |
| 18                                   | (screen* or test*).mp.                                                                                                                                                                                                                                                                                                                                                                                                                                                 |
| 19                                   | 14 or 15 or 16 or 17 or 18                                                                                                                                                                                                                                                                                                                                                                                                                                             |
| 20                                   | 13 and 19 (18433)                                                                                                                                                                                                                                                                                                                                                                                                                                                      |
| 21                                   | meta-analysis/                                                                                                                                                                                                                                                                                                                                                                                                                                                         |
| 22                                   | meta-analysis as topic/                                                                                                                                                                                                                                                                                                                                                                                                                                                |
| 23                                   | (meta analy* or metanaly* or metaanaly*).ti,ab.                                                                                                                                                                                                                                                                                                                                                                                                                        |
| 24                                   | (reference list* or bibliograph* or hand search* or manual search* or relevant journals).ab.                                                                                                                                                                                                                                                                                                                                                                           |
| 25                                   | ((systematic* or evidence*) adj2 (review* or overview*)).ti,ab.                                                                                                                                                                                                                                                                                                                                                                                                        |
| 26                                   | (search strategy or search criteria or systematic search or study selection or data extraction).ab.                                                                                                                                                                                                                                                                                                                                                                    |
| 27                                   | (search* adj4 literature).ab.                                                                                                                                                                                                                                                                                                                                                                                                                                          |
| 28                                   | (medline or pubmed or cochrane or embase or psychlit or psyclit or psychinfo or psycinfo or cinahl or science citation index or bids or cancerlit).ab.                                                                                                                                                                                                                                                                                                                 |
| 29                                   | ((pool* or combined) adj2 (data or trials or studies or results)).ab.                                                                                                                                                                                                                                                                                                                                                                                                  |
| 30                                   | cochrane.jw.                                                                                                                                                                                                                                                                                                                                                                                                                                                           |
| 31                                   | or/21-30                                                                                                                                                                                                                                                                                                                                                                                                                                                               |
| 32                                   | animals/ not humans/                                                                                                                                                                                                                                                                                                                                                                                                                                                   |
| 33                                   | exp Animals, Laboratory/                                                                                                                                                                                                                                                                                                                                                                                                                                               |
| 34                                   | exp Animal Experimentation/                                                                                                                                                                                                                                                                                                                                                                                                                                            |
| 35                                   | exp Models, Animal/                                                                                                                                                                                                                                                                                                                                                                                                                                                    |

36 exp Rodentia/  
37 (rat or rats or mouse or mice).ti.  
38 or/32-37  
39 31 not 38  
40 20 and 39

Database: Embase <1996 to present>

Date most recent search: 22-MAY-2018

Interface: Ovid

**Search Strategy: search terms**

- 1 exp Thrombophilia/
- 2 Activated Protein C Resistance/
- 3 Antithrombin III Deficiency/
- 4 blood clotting factor 5 deficiency/
- 5 protein c deficiency/
- 6 Protein S Deficiency/
- 7 exp Factor VIII/ or blood clotting factor 8/
- 8 exp Antibodies, Antiphospholipid/
- 9 phospholipid antibody/
- 10 cardiolipin antibody/
- 11 prothrombin/
- 12 beta 2-Glycoprotein I/
- 13 lupus anticoagulant/
- 14 "Methylenetetrahydrofolate Reductase (NADPH2)"/
- 15 ((prothrombin adj (G20210A or "20210")) or (protein C adj (deficienc\$ or resistance)) or protein S deficienc\$ or ((antithrombin or anti thrombin) adj deficienc\$) or (factor adj (VIII or V leiden or II leiden or II G20210A)) or (lupus adj (coagulation inhibitor or anticoagulant)) or (antibod\$ adj1 (antiphospholipid or anticardiolipin)) or at III or apc resistance or anti-beta2 glycoprotein or Methylenetetrahydrofolate reductase or mthfr).ti,ab,kw.
- 16 (thrombophil\* or hypercoagul\*).mp.
- 17 or/1-16
- 18 Mass Screening/
- 19 "diagnostic techniques and procedures"/
- 20 diagnostic tests, routine/
- 21 Genetic Testing/
- 22 (screen\* or test\*).mp.
- 23 or/18-22
- 24 systematic review/
- 25 meta-analysis/
- 26 (meta analy\* or metanaly\* or metaanaly\*).ti,ab.
- 27 (reference list\* or bibliograph\* or hand search\* or manual search\* or relevant journals).ab.
- 28 ((systematic\* or evidence\*) adj2 (review\* or overview\*)).ti,ab.
- 29 (search strategy or search criteria or systematic search or study selection or data extraction).ab.
- 30 (search\* adj4 literature).ab.
- 31 (medline or pubmed or cochrane or embase or psychlit or psyclit or psychinfo or psycinfo or cinahl or science citation index or bids or cancerlit).ab.
- 32 ((pool\* or combined) adj2 (data or trials or studies or results)).ab.
- 33 cochrane.jw.
- 34 or/24-33
- 35 animals/ not humans/
- 36 nonhuman/
- 37 exp Animal Experiment/
- 38 exp Experimental Animal/
- 39 animal model/
- 40 exp Rodent/
- 41 (rat or rats or mouse or mice).ti.

|    |           |
|----|-----------|
| 42 | or/35-41  |
| 43 | 34 not 42 |
| 44 | 17 and 23 |
| 45 | 43 and 44 |

Database: Cochrane Library

Date most recent search: 22-MAY-2018

**Search Strategy: search terms**

- #1 MeSH descriptor: [Thrombophilia] explode all trees
- #2 MeSH descriptor: [Factor VIII] explode all trees
- #3 MeSH descriptor: [Antibodies, Antiphospholipid] explode all trees
- #4 MeSH descriptor: [Prothrombin] this term only
- #5 MeSH descriptor: [beta 2-Glycoprotein I] this term only
- #6 MeSH descriptor: [Methylenetetrahydrofolate Reductase (NADPH2)] this term only
- #7 MeSH descriptor: [Activated Protein C Resistance] this term only
- #8 MeSH descriptor: [Antithrombin III Deficiency] this term only
- #9 MeSH descriptor: [Protein C Deficiency] this term only
- #10 MeSH descriptor: [Protein S Deficiency] this term only
- #11 (thrombophil\* or hypercoagul\*)
- #12 ((prothrombin near (G20210A or "20210")) or (protein C near (deficienc\* or resistance)) or protein S deficienc\* or ((antithrombin or anti thrombin) near deficienc\*) or (factor near (VIII or V leiden or II leiden or II G20210A)) or (lupus near (coagulation inhibitor or anticoagulant)) or (antibod\* near (antiphospholipid or anticardiolipin)) or at III or apc resistance or anti-beta2 glycoprotein or Methylenetetrahydrofolate reductase or mthfr):ti,ab,kw
- #13 #1 or #2 or #3 or #4 or #5 or #6 or #7 or #8 or #9 or #10 or #11 or #12
- #14 MeSH descriptor: [Mass Screening] this term only
- #15 MeSH descriptor: [Diagnostic Techniques and Procedures] this term only
- #16 MeSH descriptor: [Diagnostic Tests, Routine] this term only
- #17 MeSH descriptor: [Genetic Testing] this term only
- #18 #14 or #15 or #16 or #17
- #19 #13 and #18

## Systematic reviews or observational studies on prognosis of thrombophilia:

|                                      |                                                                                                                                                        |
|--------------------------------------|--------------------------------------------------------------------------------------------------------------------------------------------------------|
| Database:                            | Ovid MEDLINE(R) Epub Ahead of Print, In-Process & Other Non-Indexed Citations, Ovid MEDLINE(R) Daily, Ovid MEDLINE and Versions(R) <1946 to present>   |
| Date most recent search:             | 23-MAY-2018                                                                                                                                            |
| Interface:                           | Ovid                                                                                                                                                   |
| <b>Search Strategy: search terms</b> |                                                                                                                                                        |
| 1                                    | exp Risk/                                                                                                                                              |
| 2                                    | exp Risk Assessment/                                                                                                                                   |
| 3                                    | exp risk factors/                                                                                                                                      |
| 4                                    | exp Prognosis/                                                                                                                                         |
| 5                                    | "Predictive Value of Tests"/                                                                                                                           |
| 6                                    | (risk or prognos* or predict* or probability).ti,ab,kw.                                                                                                |
| 7                                    | or/1-6                                                                                                                                                 |
| 8                                    | exp Thromboembolism/ or exp Venous Thromboembolism/                                                                                                    |
| 9                                    | exp Pulmonary Embolism/                                                                                                                                |
| 10                                   | exp Venous Thrombosis/                                                                                                                                 |
| 11                                   | Thrombophlebitis/                                                                                                                                      |
| 12                                   | (DVT or VTE or PE).mp.                                                                                                                                 |
| 13                                   | ((Pulmon\$ or vein or venous or lung) adj (Emboli\$ or thromb\$)).mp.                                                                                  |
| 14                                   | (thrombus* or thrombotic* or thrombotic* or thromboemboli* or thrombos* or embol*).mp.                                                                 |
| 15                                   | ((deep or thromb* or stasis) adj2 (vein* or venous)) or (blood flow stasis or blood clot).mp.                                                          |
| 16                                   | or/8-15                                                                                                                                                |
| 17                                   | meta-analysis/                                                                                                                                         |
| 18                                   | meta-analysis as topic/                                                                                                                                |
| 19                                   | (meta analy* or metanaly* or metaanaly*).ti,ab.                                                                                                        |
| 20                                   | (reference list* or bibliograph* or hand search* or manual search* or relevant journals).ab.)                                                          |
| 21                                   | ((systematic* or evidence*) adj2 (review* or overview*)).ti,ab.                                                                                        |
| 22                                   | (search strategy or search criteria or systematic search or study selection or data extraction).ab.                                                    |
| 23                                   | (search* adj4 literature).ab.                                                                                                                          |
| 24                                   | (medline or pubmed or cochrane or embase or psychlit or psyclit or psychinfo or psycinfo or cinahl or science citation index or bids or cancerlit).ab. |
| 25                                   | ((pool* or combined) adj2 (data or trials or studies or results)).ab.                                                                                  |
| 26                                   | cochrane.jw.                                                                                                                                           |
| 27                                   | or/17-26                                                                                                                                               |
| 28                                   | animals/ not humans/                                                                                                                                   |
| 29                                   | exp Animals, Laboratory/                                                                                                                               |
| 30                                   | exp Animal Experimentation/                                                                                                                            |
| 31                                   | exp Models, Animal/                                                                                                                                    |
| 32                                   | exp Rodentia/                                                                                                                                          |
| 33                                   | (rat or rats or mouse or mice).ti.                                                                                                                     |
| 34                                   | or/28-33                                                                                                                                               |
| 35                                   | 27 not 34                                                                                                                                              |
| 36                                   | exp Thrombophilia/                                                                                                                                     |
| 37                                   | Activated Protein C Resistance/                                                                                                                        |
| 38                                   | Antithrombin III Deficiency/                                                                                                                           |
| 39                                   | protein c deficiency/                                                                                                                                  |
| 40                                   | Protein S Deficiency/                                                                                                                                  |
| 41                                   | exp Factor VIII/                                                                                                                                       |
| 42                                   | exp Antibodies, Antiphospholipid/                                                                                                                      |

43 prothrombin/  
44 beta 2-Glycoprotein I/  
45 "Methylenetetrahydrofolate Reductase (NADPH2)"/  
46 ((prothrombin adj (G20210A or "20210")) or (protein C adj (deficienc\$ or resistance)) or protein S  
deficienc\$ or ((antithrombin or anti thrombin) adj deficienc\$) or (factor adj (VIII or V leiden or II leiden or II  
G20210A)) or (lupus adj (coagulation inhibitor or anticoagulant)) or (antibod\$ adj1 (antiphospholipid or  
anticardiolipin)) or at III or apc resistance or anti-beta2 glycoprotein or Methylenetetrahydrofolate reductase  
or mthfr).ti,ab,kw.  
47 (thrombophil\* or hypercoagul\*).mp.  
48 or/36-47  
49 exp pregnancy/  
50 exp Pregnancy Trimesters/  
51 exp pregnancy complication/  
52 exp prenatal care/  
53 exp Preconception Care/  
54 exp peripartum period/  
55 exp perinatal care/  
56 ((Pregnanc\* adj Complication\* adj Hematologic\*) or (Complicatio\* adj Hematologic\* adj Pregnanc\*) or  
(Hematologic\* adj Pregnanc\* adj Complicatio\*) or (Hematologic\* adj Complicatio\* adj Pregnanc\*) or  
(Complication\* adj Pregnanc\* adj Hematologic\*) or (Pregnanc\* adj Hematologic\* adj Complicatio\*)).mp.  
57 (antenatal\* or "ante natal\*" or antepart\* or "ante part\*" or ((first or second or third) adj1 trimester\*) or  
labor or laboring or labour or labouring or maternal\* or obstetric\* or perinatal\* or "peri natal\*" or pregnan\* or  
prenat\* or "pre nat\*" or puerperal\* or puerperium\*).ti,ab,kw.  
58 or/49-57  
59 (cascade or first-degree or family or relatives).ti,ab.  
60 \*Contraceptives, Oral/  
61 \*Hormone Replacement Therapy/  
62 \*estrogen replacement therapy/  
63 ((hormone or estrogen or oestrogen) adj1 (replacement or therap\* or substitut\*)).mp.  
64 (oral adj1 (contraceptive\* or contraception)).mp.  
65 or/60-64  
66 (Arterial adj1 thromb\*).ti,ab,kw.  
67 or/16,58-59,65-66  
68 and/48,67  
69 and/7,68  
70 and/35,69  
71 limit 70 to yr="2006 - Current"  
72 epidemiologic studies/  
73 exp case control studies/  
74 exp cohort studies/  
75 cross-sectional studies/  
76 case control.ti,ab.  
77 (cohort adj (study or studies or analys\*)).ti,ab.  
78 ((follow up or observational or uncontrolled or non randomi#ed or nonrandomi#ed or epidemiologic\*)  
adj (study or studies)).ti,ab.  
79 ((longitudinal or retrospective or prospective or cross sectional) and (study or studies or review or analys\*  
or cohort\*)).ti,ab.  
80 or/72-79  
81 and/69,80  
82 81 not 70  
83 limit 82 to yr="2006 -Current"  
84 or/70-71,81-83  
85 exp Thrombophilia/

86 Activated Protein C Resistance/  
87 Antithrombin III Deficiency/  
88 protein c deficiency/  
89 Protein S Deficiency/  
90 exp Factor VIII/  
91 exp Antibodies, Antiphospholipid/  
92 prothrombin/  
93 beta 2-Glycoprotein I/  
94 "Methylenetetrahydrofolate Reductase (NADPH2)"/  
95 ((prothrombin adj (G20210A or "20210")) or (protein C adj (deficienc\$ or resistance)) or protein S  
deficienc\$ or ((antithrombin or anti thrombin) adj deficienc\$) or (factor adj (VIII or V leiden or II leiden or II  
G20210A)) or (lupus adj (coagulation inhibitor or anticoagulant)) or (antibod\$ adj1 (antiphospholipid or  
anticardiolipin)) or at III or apc resistance or anti-beta2 glycoprotein or Methylenetetrahydrofolate reductase  
or mthfr).ti,ab,kw.  
96 (thrombophil\* or hypercoagul\*).mp.  
97 or/85-96  
98 exp Mass Screening/  
99 "diagnostic techniques and procedures"/  
100 diagnostic tests, routine/  
101 Genetic Testing/  
102 (screen\* or test\*).mp.  
103 or/98-102  
104 97 and 103  
105 meta-analysis/  
106 meta-analysis as topic/  
107 (meta analy\* or metanaly\* or metaanaly\*).ti,ab.  
108 (reference list\* or bibliograph\* or hand search\* or manual search\* or relevant journals).ab.  
109 ((systematic\* or evidence\*) adj2 (review\* or overview\*)).ti,ab.  
110 (search strategy or search criteria or systematic search or study selection or data extraction).ab.  
111 (search\* adj4 literature).ab.  
112 (medline or pubmed or cochrane or embase or psychlit or psyclit or psychinfo or psycinfo or cinahl or  
science citation index or bids or cancerlit).ab.  
113 ((pool\* or combined) adj2 (data or trials or studies or results)).ab.  
114 cochrane.jw.  
115 or/105-114  
116 animals/ not humans/  
117 exp Animals, Laboratory/  
118 exp Animal Experimentation/  
119 exp Models, Animal/  
120 exp Rodentia/  
121 (rat or rats or mouse or mice).ti.  
122 or/116-121  
123 115 not 122  
124 and/104,123  
125 71 not 124



Database: Embase <1996 to present>

Date most recent search: 23-MAY-2018

Interface: Ovid

### Search Strategy: search terms

- 1 exp vein thrombosis/
- 2 exp Venous Thromboembolism/
- 3 exp 'lung embolism'/
- 4 Thrombophlebitis/
- 5 (PE or DVT or VTE).mp.
- 6 ((Pulmon\$ or vein or venous or lung) adj (Emboli\$ or thromb\$)).mp.
- 7 (thrombus\* or thrombotic\* or thrombotic\* or thromboemboli\* or thrombos\* or embol\*).mp.
- 8 (((deep or thromb\* or stasis) adj2 (vein\* or venous)) or (blood flow stasis or blood clot)).mp.
- 9 or/1-8
- 10 exp Thrombophilia/
- 11 Activated Protein C Resistance/
- 12 Antithrombin III Deficiency/
- 13 blood clotting factor 5 deficiency/
- 14 protein c deficiency/
- 15 Protein S Deficiency/
- 16 exp Factor VIII/ or blood clotting factor 8/
- 17 exp Antibodies, Antiphospholipid/
- 18 phospholipid antibody/
- 19 cardiolipin antibody/
- 20 prothrombin/
- 21 beta 2-Glycoprotein I/
- 22 lupus anticoagulant/
- 23 "Methylenetetrahydrofolate Reductase (NADPH2)"/
- 24 ((prothrombin adj (G20210A or "20210")) or (protein C adj (deficienc\$ or resistance)) or protein S deficienc\$ or ((antithrombin or anti thrombin) adj deficienc\$) or (factor adj (VIII or V leiden or II leiden or II G20210A)) or (lupus adj (coagulation inhibitor or anticoagulant)) or (antibod\$ adj1 (antiphospholipid or anticardiolipin)) or at III or apc resistance or anti-beta2 glycoprotein or Methylenetetrahydrofolate reductase or mthfr).ti,ab,kw.
- 25 (thrombophil\* or hypercoagul\*).mp.
- 26 or/10-25
- 27 exp pregnancy/
- 28 first trimester pregnancy/ or second trimester pregnancy/ or third trimester pregnancy/
- 29 exp pregnancy complication/
- 30 exp prenatal care/
- 31 exp maternal care/
- 32 exp perinatal period/
- 33 exp perinatal care/
- 34 ((Pregnanc\* adj Complication\* adj Hematologic\*) or (Complicatio\* adj Hematologic\* adj Pregnanc\*) or (Hematologic\* adj Pregnanc\* adj Complicatio\*) or (Hematologic\* adj Complicatio\* adj Pregnanc\*) or (Complication\* adj Pregnanc\* adj Hematologic\*) or (Pregnanc\* adj Hematologic\* adj Complicatio\*)).mp.
- 35 (antenatal\* or "ante natal\*" or antepart\* or "ante part\*" or ((first or second or third) adj1 trimester\*) or labor or laboring or labour or labouring or maternal\* or obstetric\* or perinatal\* or "peri natal\*" or pregnan\* or prenat\* or "pre nat\*" or puerperal\* or puerperium\*).mp.
- 36 or/27-35
- 37 (cascade or first-degree or family or relatives).ti,ab,kw.
- 38 \*contraceptives, oral/

39 \*oral contraceptive agent/  
40 \*hormone replacement therapy/  
41 \*estrogen replacement therapy/  
42 \*hormone substitution/  
43 \*estrogen therapy/  
44 ((hormone or estrogen or oestrogen) adj1 (replacement or therap\* or substitut\*)).mp.  
45 (oral adj1 (contraceptive\* or contraception)).mp.  
46 or/38-45  
47 systematic review/  
48 meta-analysis/  
49 (meta analy\* or metanaly\* or metaanaly\*).ti,ab.  
50 (reference list\* or bibliograph\* or hand search\* or manual search\* or relevant journals).ab.  
51 ((systematic\* or evidence\*) adj2 (review\* or overview\*)).ti,ab.  
52 (search strategy or search criteria or systematic search or study selection or data extraction).ab.  
53 (search\* adj4 literature).ab.  
54 (medline or pubmed or cochrane or embase or psychlit or psyclit or psychinfo or psycinfo or cinahl or  
science citation index or bids or cancerlit).ab.  
55 ((pool\* or combined) adj2 (data or trials or studies or results)).ab.  
56 cochrane.jw.  
57 or/47-56  
58 animals/ not humans/  
59 nonhuman/ (4069565)  
60 exp Animal Experiment/  
61 exp Experimental Animal/  
62 animal model/  
63 exp Rodent/  
64 (rat or rats or mouse or mice).ti.  
65 or/58-64  
66 57 not 65  
67 exp risk factor/ or exp risk assessment/ or exp risk/  
68 exp prognosis/  
69 exp predictive value/  
70 (risk or prognos\* or predict\* or probability).ti,ab,kw.  
71 or/67-70  
72 (Arterial adj1 thromb\*).ti,ab,kw.  
73 or/9,36-37,46,72  
74 and/26,73  
75 and/71,74  
76 and/66,75  
77 limit 76 to yr="2006 -Current"  
78 exp Thrombophilia/  
79 Activated Protein C Resistance/  
80 Antithrombin III Deficiency/  
81 blood clotting factor 5 deficiency/  
82 protein c deficiency/  
83 Protein S Deficiency/  
84 exp Factor VIII/ or blood clotting factor 8/  
85 exp Antibodies, Antiphospholipid/  
86 phospholipid antibody/  
87 cardiolipin antibody/  
88 prothrombin/  
89 beta 2-Glycoprotein I/  
90 lupus anticoagulant/

91 "Methylenetetrahydrofolate Reductase (NADPH2)"/  
92 ((prothrombin adj (G20210A or "20210")) or (protein C adj (deficienc\$ or resistance)) or protein S  
deficienc\$ or ((antithrombin or anti thrombin) adj deficienc\$) or (factor adj (VIII or V leiden or II leiden or II  
G20210A)) or (lupus adj (coagulation inhibitor or anticoagulant)) or (antibod\$ adj1 (antiphospholipid or  
anticardiolipin)) or at III or apc resistance or anti-beta2 glycoprotein or Methylenetetrahydrofolate reductase  
or mthfr).ti,ab,kw.  
93 (thrombophil\* or hypercoagul\*).mp.  
94 or/78-93  
95 Mass Screening/  
96 "diagnostic techniques and procedures"/  
97 diagnostic tests, routine/  
98 Genetic Testing/  
99 (screen\* or test\*).mp.  
100 or/95-99  
101 systematic review/  
102 meta-analysis/  
103 (meta analy\* or metanaly\* or metaanaly\*).ti,ab.  
104 (reference list\* or bibliograph\* or hand search\* or manual search\* or relevant journals).ab.  
105 ((systematic\* or evidence\*) adj2 (review\* or overview\*)).ti,ab.  
106 (search strategy or search criteria or systematic search or study selection or data extraction).ab.  
107 (search\* adj4 literature).ab.  
108 (medline or pubmed or cochrane or embase or psychlit or psyclit or psychinfo or psycinfo or cinahl or  
science citation index or bids or cancerlit).ab.  
109 ((pool\* or combined) adj2 (data or trials or studies or results)).ab.  
110 cochrane.jw.  
111 or/101-110  
112 animals/ not humans/  
113 nonhuman/  
114 exp Animal Experiment/  
115 exp Experimental Animal/  
116 animal model/  
117 exp Rodent/  
118 (rat or rats or mouse or mice).ti.  
119 or/112-118  
120 111 not 119  
121 and/94,100  
122 and/120-121  
123 77 not 122

Database: Cochrane Library

Date most recent search: 23-MAY-2018

**Search Strategy: search terms**

- #1 MeSH descriptor: [Thrombophilia] explode all trees
- #2 MeSH descriptor: [Factor VIII] explode all trees
- #3 MeSH descriptor: [Antibodies, Antiphospholipid] explode all trees
- #4 MeSH descriptor: [Prothrombin] this term only
- #5 MeSH descriptor: [beta 2-Glycoprotein I] this term only
- #6 MeSH descriptor: [Methylenetetrahydrofolate Reductase (NADPH2)] this term only
- #7 MeSH descriptor: [Activated Protein C Resistance] this term only
- #8 MeSH descriptor: [Antithrombin III Deficiency] this term only
- #9 MeSH descriptor: [Protein C Deficiency] this term only
- #10 MeSH descriptor: [Protein S Deficiency] this term only
- #11 (thrombophil\* or hypercoagul\*)
- #12 ((prothrombin near (G20210A or "20210")) or (protein C near (deficienc\* or resistance)) or protein S deficienc\* or ((antithrombin or anti thrombin) near deficienc\*) or (factor near (VIII or V leiden or II leiden or II G20210A)) or (lupus near (coagulation inhibitor or anticoagulant)) or (antibod\* near (antiphospholipid or anticardiolipin)) or at III or apc resistance or anti-beta2 glycoprotein or Methylenetetrahydrofolate reductase or mthfr):ti,ab,kw
- #13 #1 or #2 or #3 or #4 or #5 or #6 or #7 or #8 or #9 or #10 or #11 or #12
- #14 MeSH descriptor: [Mass Screening] this term only
- #15 MeSH descriptor: [Diagnostic Techniques and Procedures] this term only
- #16 MeSH descriptor: [Diagnostic Tests, Routine] this term only
- #17 MeSH descriptor: [Genetic Testing] this term only
- #18 #14 or #15 or #16 or #17
- #19 #13 and #18
- #20 MeSH descriptor: [Thrombophilia] explode all trees
- #21 MeSH descriptor: [Factor VIII] explode all trees
- #22 MeSH descriptor: [Antibodies, Antiphospholipid] explode all trees
- #23 MeSH descriptor: [Prothrombin] this term only
- #24 MeSH descriptor: [beta 2-Glycoprotein I] this term only
- #25 MeSH descriptor: [Methylenetetrahydrofolate Reductase (NADPH2)] this term only
- #26 MeSH descriptor: [Activated Protein C Resistance] this term only
- #27 MeSH descriptor: [Antithrombin III Deficiency] this term only
- #28 MeSH descriptor: [Protein C Deficiency] this term only
- #29 MeSH descriptor: [Protein S Deficiency] this term only
- #30 (thrombophil\* or hypercoagul\*)
- #31 ((prothrombin near (G20210A or "20210")) or (protein C near (deficienc\* or resistance)) or protein S deficienc\* or ((antithrombin or anti thrombin) near deficienc\*) or (factor near (VIII or V leiden or II leiden or II G20210A)) or (lupus near (coagulation inhibitor or anticoagulant)) or (antibod\* near (antiphospholipid or anticardiolipin)) or at III or apc resistance or anti-beta2 glycoprotein or Methylenetetrahydrofolate reductase or mthfr):ti,ab,kw
- #32 #20 or #21 or #22 or #23 or #24 or #25 or #26 or #27 or #28 or #29 or #30 or #31
- #33 MeSH descriptor: [Venous Thrombosis] explode all trees
- #34 MeSH descriptor: [Thromboembolism] explode all trees
- #35 MeSH descriptor: [Venous Thromboembolism] explode all trees
- #36 MeSH descriptor: [Pulmonary Embolism] explode all trees
- #37 MeSH descriptor: [Thrombophlebitis] this term only
- #38 (DVT or VTE or PE)
- #39 ((Pulmon\* or vein or venous or lung) near (Emboli\* or thromb\*))

#40 (Thrombus\* or thrombotic\* or thrombolic\* or thromboemboli\* or thrombos\* or embol\*)

#41 (((deep or thromb\* or stasis) near/2 (vein\* or venous)) or (blood flow stasis or blood clot))

#42 #33 or #34 or #35 or #36 or #37 or #38 or #39 or #40 or #41

#43 MeSH descriptor: [Pregnancy] explode all trees

#44 MeSH descriptor: [Pregnancy Trimesters] explode all trees

#45 MeSH descriptor: [Pregnancy Complications, Hematologic] explode all trees

#46 (Pregnanc\* near Complication\* near Hematologic\*) or (Complicatio\* near Hematologic\* near Pregnanc\*) or (Hematologic\* near Pregnanc\* near Complicatio\*) or (Hematologic\* near Complicatio\* near Pregnanc\*) or (Complication\* near Pregnanc\* near Hematologic\*) or (Pregnanc\* near Hematologic\* near Complicatio\*)

#47 MeSH descriptor: [Prenatal Care] explode all trees

#48 MeSH descriptor: [Preconception Care] explode all trees

#49 MeSH descriptor: [Peripartum Period] explode all trees

#50 MeSH descriptor: [Perinatal Care] this term only

#51 (antenatal\* or "ante natal\*" or antepart\* or "ante part\*" or ((first or second or third) near/1 trimester\*) or labor or laboring or labour or labouring or maternal\* or obstetric\* or perinatal\* or "peri natal\*" or pregnan\* or prenat\* or "pre nat\*" or puerperal\* or puerperium\*):ti,ab,kw

#52 #43 or #44 or #45 or #46 or #47 or #48 or #49 or #50 or #51

#53 (cascade or first-degree or family or relatives):ti,ab,kw

#54 MeSH descriptor: [Contraceptives, Oral] explode all trees

#55 MeSH descriptor: [Hormone Replacement Therapy] explode all trees

#56 (oral near/1 (contraceptive\* or contraception))

#57 ((hormone replacement or estrogen or oestrogen) near/1 therap\*)

#58 ((oestrogen or estrogen) near/1 replacement)

#59 #54 or #55 or #56 or #57 or #58

#60 (Arterial near/1 thromb\*):ti,ab,kw

#61 #42 or #52 or #53 or #59 or #60

#62 #32 and #61

#63 #62 not #19

## Systematic reviews on prevalence of thrombophilia:

|                                      |                                                                                                                                                                                                                                                                                                                                                                                                                                                                        |
|--------------------------------------|------------------------------------------------------------------------------------------------------------------------------------------------------------------------------------------------------------------------------------------------------------------------------------------------------------------------------------------------------------------------------------------------------------------------------------------------------------------------|
| Database:                            | Ovid MEDLINE(R) Epub Ahead of Print, In-Process & Other Non-Indexed Citations, Ovid MEDLINE(R) Daily, Ovid MEDLINE and Versions(R) <1946 to present>                                                                                                                                                                                                                                                                                                                   |
| Date most recent search:             | 21-MAY-2018                                                                                                                                                                                                                                                                                                                                                                                                                                                            |
| Interface:                           | Ovid                                                                                                                                                                                                                                                                                                                                                                                                                                                                   |
| <b>Search Strategy: Search Terms</b> |                                                                                                                                                                                                                                                                                                                                                                                                                                                                        |
| 1                                    | exp prevalence/                                                                                                                                                                                                                                                                                                                                                                                                                                                        |
| 2                                    | prevalence.ti,ab,kw.                                                                                                                                                                                                                                                                                                                                                                                                                                                   |
| 3                                    | exp incidence/                                                                                                                                                                                                                                                                                                                                                                                                                                                         |
| 4                                    | incidence.ti,ab,kw.                                                                                                                                                                                                                                                                                                                                                                                                                                                    |
| 5                                    | or/1-4                                                                                                                                                                                                                                                                                                                                                                                                                                                                 |
| 6                                    | exp Thrombophilia/                                                                                                                                                                                                                                                                                                                                                                                                                                                     |
| 7                                    | Activated Protein C Resistance/                                                                                                                                                                                                                                                                                                                                                                                                                                        |
| 8                                    | Antithrombin III Deficiency/                                                                                                                                                                                                                                                                                                                                                                                                                                           |
| 9                                    | protein c deficiency/                                                                                                                                                                                                                                                                                                                                                                                                                                                  |
| 10                                   | Protein S Deficiency/                                                                                                                                                                                                                                                                                                                                                                                                                                                  |
| 11                                   | exp Factor VIII/                                                                                                                                                                                                                                                                                                                                                                                                                                                       |
| 12                                   | exp Antibodies, Antiphospholipid/                                                                                                                                                                                                                                                                                                                                                                                                                                      |
| 13                                   | prothrombin/                                                                                                                                                                                                                                                                                                                                                                                                                                                           |
| 14                                   | beta 2-Glycoprotein I/                                                                                                                                                                                                                                                                                                                                                                                                                                                 |
| 15                                   | "Methylenetetrahydrofolate Reductase (NADPH2)"/                                                                                                                                                                                                                                                                                                                                                                                                                        |
| 16                                   | ((prothrombin adj (G20210A or "20210")) or (protein C adj (deficienc\$ or resistance)) or protein S deficienc\$ or ((antithrombin or anti thrombin) adj deficienc\$) or (factor adj (VIII or V leiden or II leiden or II G20210A)) or (lupus adj (coagulation inhibitor or anticoagulant)) or (antibod\$ adj1 (antiphospholipid or anticardiolipin)) or at III or apc resistance or anti-beta2 glycoprotein or Methylenetetrahydrofolate reductase or mthfr).ti,ab,kw. |
| 17                                   | (thrombophil* or hypercoagul*).mp.                                                                                                                                                                                                                                                                                                                                                                                                                                     |
| 18                                   | or/6-17                                                                                                                                                                                                                                                                                                                                                                                                                                                                |
| 19                                   | 5 and 18                                                                                                                                                                                                                                                                                                                                                                                                                                                               |
| 20                                   | meta-analysis/                                                                                                                                                                                                                                                                                                                                                                                                                                                         |
| 21                                   | meta-analysis as topic/                                                                                                                                                                                                                                                                                                                                                                                                                                                |
| 22                                   | (meta analy* or metanaly* or metaanaly*).ti,ab.                                                                                                                                                                                                                                                                                                                                                                                                                        |
| 23                                   | (reference list* or bibliograph* or hand search* or manual search* or relevant journals).ab.                                                                                                                                                                                                                                                                                                                                                                           |
| 24                                   | ((systematic* or evidence*) adj2 (review* or overview*)).ti,ab.                                                                                                                                                                                                                                                                                                                                                                                                        |
| 25                                   | (search strategy or search criteria or systematic search or study selection or data extraction).ab.                                                                                                                                                                                                                                                                                                                                                                    |
| 26                                   | (search* adj4 literature).ab.                                                                                                                                                                                                                                                                                                                                                                                                                                          |
| 27                                   | (medline or pubmed or cochrane or embase or psychlit or psyclit or psychinfo or psycinfo or cinahl or science citation index or bids or cancerlit).ab.                                                                                                                                                                                                                                                                                                                 |
| 28                                   | ((pool* or combined) adj2 (data or trials or studies or results)).ab.                                                                                                                                                                                                                                                                                                                                                                                                  |
| 29                                   | cochrane.jw.                                                                                                                                                                                                                                                                                                                                                                                                                                                           |
| 30                                   | or/20-29                                                                                                                                                                                                                                                                                                                                                                                                                                                               |
| 31                                   | animals/ not humans/                                                                                                                                                                                                                                                                                                                                                                                                                                                   |
| 32                                   | exp Animals, Laboratory/                                                                                                                                                                                                                                                                                                                                                                                                                                               |
| 33                                   | exp Animal Experimentation/                                                                                                                                                                                                                                                                                                                                                                                                                                            |
| 34                                   | exp Models, Animal/                                                                                                                                                                                                                                                                                                                                                                                                                                                    |
| 35                                   | exp Rodentia/                                                                                                                                                                                                                                                                                                                                                                                                                                                          |
| 36                                   | (rat or rats or mouse or mice).ti.                                                                                                                                                                                                                                                                                                                                                                                                                                     |
| 37                                   | or/31-36                                                                                                                                                                                                                                                                                                                                                                                                                                                               |
| 38                                   | 30 not 37                                                                                                                                                                                                                                                                                                                                                                                                                                                              |



Database: Embase <1996 to present>

Date most recent search: 21-MAY-2018

Interface: Ovid

**Search Strategy: search terms**

- 1 exp prevalence/
- 2 prevalence.ti,ab,kw.
- 3 exp incidence/
- 4 incidence.ti,ab,kw.
- 5 or/1-4
- 6 exp Thrombophilia/
- 7 Activated Protein C Resistance/
- 8 Antithrombin III Deficiency/
- 9 blood clotting factor 5 deficiency/
- 10 protein c deficiency/
- 11 Protein S Deficiency/
- 12 exp Factor VIII/ or blood clotting factor 8/
- 13 exp Antibodies, Antiphospholipid/
- 14 phospholipid antibody/
- 15 cardiolipin antibody/
- 16 prothrombin/
- 17 beta 2-Glycoprotein I/
- 18 lupus anticoagulant/
- 19 "Methylenetetrahydrofolate Reductase (NADPH2)"/
- 20 ((prothrombin adj (G20210A or "20210")) or (protein C adj (deficienc\$ or resistance)) or protein S deficienc\$ or ((antithrombin or anti thrombin) adj deficienc\$) or (factor adj (VIII or V leiden or II leiden or II G20210A)) or (lupus adj (coagulation inhibitor or anticoagulant)) or (antibod\$ adj1 (antiphospholipid or anticardiolipin)) or at III or apc resistance or anti-beta2 glycoprotein or Methylenetetrahydrofolate reductase or mthfr).ti,ab,kw.
- 21 (thrombophil\* or hypercoagul\*).mp.
- 22 or/6-21
- 23 systematic review/
- 24 meta-analysis/
- 25 (meta analy\* or metanaly\* or metaanaly\*).ti,ab.
- 26 (reference list\* or bibliograph\* or hand search\* or manual search\* or relevant journals).ab.
- 27 ((systematic\* or evidence\*) adj2 (review\* or overview\*)).ti,ab.
- 28 (search strategy or search criteria or systematic search or study selection or data extraction).ab.
- 29 (search\* adj4 literature).ab.
- 30 (medline or pubmed or cochrane or embase or psychlit or psyclit or psychinfo or psycinfo or cinahl or science citation index or bids or cancerlit).ab.
- 31 ((pool\* or combined) adj2 (data or trials or studies or results)).ab.
- 32 cochrane.jw.
- 33 or/23-32
- 34 animals/ not humans/
- 35 nonhuman/
- 36 exp Animal Experiment/
- 37 exp Experimental Animal/
- 38 animal model/
- 39 exp Rodent/
- 40 (rat or rats or mouse or mice).ti.
- 41 or/34-40



42 33 not 41

43 5 and 22 and 42

Database, Update 1: Cochrane Library

Date most recent search: 21-MAY-2018

**Search Strategy: search terms**

- #1 MeSH descriptor: [Prevalence] explode all trees
- #2 (prevalence):ti,ab,kw
- #3 MeSH descriptor: [Incidence] explode all trees
- #4 (Incidence):ti,ab,kw
- #5 #1 or #2 or #3 or #4
- #6 MeSH descriptor: [Thrombophilia] explode all trees
- #7 MeSH descriptor: [Factor VIII] explode all trees
- #8 MeSH descriptor: [Antibodies, Antiphospholipid] explode all trees
- #9 MeSH descriptor: [Prothrombin] this term only
- #10 MeSH descriptor: [beta 2-Glycoprotein I] this term only
- #11 MeSH descriptor: [Methylenetetrahydrofolate Reductase (NADPH2)] this term only
- #12 MeSH descriptor: [Activated Protein C Resistance] this term only
- #13 MeSH descriptor: [Antithrombin III Deficiency] this term only
- #14 MeSH descriptor: [Protein C Deficiency] this term only
- #15 MeSH descriptor: [Protein S Deficiency] this term only
- #16 (thrombophil\* or hypercoagul\*)
- #17 ((prothrombin near (G20210A or "20210")) or (protein C near (deficienc\* or resistance)) or protein S deficienc\* or ((antithrombin or anti thrombin) near deficienc\*) or (factor near (VIII or V leiden or II leiden or II G20210A)) or (lupus near (coagulation inhibitor or anticoagulant)) or (antibod\* near (antiphospholipid or anticardiolipin)) or at III or apc resistance or anti-beta2 glycoprotein or Methylenetetrahydrofolate reductase or mthfr):ti,ab,kw
- #18 #6 or #7 or #8 or #9 or #10 or #11 or #12 or #13 or #14 or #15 or #16 or #17
- #19 #6 or #7 or #8 or #9 or #10 or #11 or #12 or #13 or #14 or #15 or #16
- #20 #5 and #18

## Systematic reviews and observational studies on unusual site thrombosis:

|                          |                                                                                                                                                      |
|--------------------------|------------------------------------------------------------------------------------------------------------------------------------------------------|
| Database:                | Ovid MEDLINE(R) Epub Ahead of Print, In-Process & Other Non-Indexed Citations, Ovid MEDLINE(R) Daily, Ovid MEDLINE and Versions(R) <1946 to present> |
| Date most recent search: | 18-MAY-2018                                                                                                                                          |
| Interface:               | Ovid                                                                                                                                                 |

### Search Strategy: search terms

- 1 mesenteric veins/ or portal vein/ or splenic vein/ or Mesenteric Vascular Occlusion/
- 2 (Mesenteric vein adj thrombo\*).ti,ab,kw.
- 3 Portal Vein/
- 4 (Portal vein adj thrombo\*).ti,ab,kw.
- 5 exp Budd-Chiari Syndrome/
- 6 Splanchnic Circulation/
- 7 (splanchn\* adj Thrombo\*).ti,ab,kw.
- 8 Budd-Chiari Syndrome.ti,ab,kw.
- 9 mesenteric veins/ or splenic vein/ or
- 10 ((Mesenteric vein or Mesenteric Venous) adj thrombo\*).ti,ab,kw.
- 11 exp Intracranial Thrombosis/
- 12 ((Intracranial or cerebral or sinus) adj Thrombo\*).ti,ab,kw.
- 13 or/3-12
- 14 epidemiologic studies/
- 15 exp case control studies/
- 16 exp cohort studies/
- 17 cross-sectional studies/
- 18 case control.ti,ab.
- 19 (cohort adj (study or studies or analys\*)).ti,ab.
- 20 ((follow up or observational or uncontrolled or non randomi#ed or nonrandomi#ed or epidemiologic\*) adj (study or studies)).ti,ab.
- 21 ((longitudinal or retrospective or prospective or cross sectional) and (study or studies or review or analys\* or cohort\*)).ti,ab.
- 22 or/14-21
- 23 meta-analysis/
- 24 meta-analysis as topic/
- 25 (meta analy\* or metanaly\* or metaanaly\*).ti,ab.
- 26 (reference list\* or bibliograph\* or hand search\* or manual search\* or relevant journals).ab.
- 27 ((systematic\* or evidence\*) adj2 (review\* or overview\*)).ti,ab.
- 28 (search strategy or search criteria or systematic search or study selection or data extraction).ab.
- 29 (search\* adj4 literature).ab.
- 30 (medline or pubmed or cochrane or embase or psychlit or psyclit or psychinfo or psycinfo or cinahl or science citation index or bids or cancerlit).ab.
- 31 ((pool\* or combined) adj2 (data or trials or studies or results)).ab.
- 32 cochrane.jw.
- 33 or/23-32
- 34 animals/ not humans/
- 35 exp Animals, Laboratory/
- 36 exp Animal Experimentation/
- 37 exp Models, Animal/
- 38 exp Rodentia/
- 39 (rat or rats or mouse or mice).ti.
- 40 or/34-39

|    |                                |
|----|--------------------------------|
| 41 | 33 not 40                      |
| 42 | 13 and 41                      |
| 43 | 22 not 40                      |
| 44 | 13 and 43                      |
| 45 | limit 44 to yr="2006 -Current" |
| 46 | 45 not 42                      |
| 47 | 42 or 46                       |

Database: Embase <1996 to present>

Date most recent search: 18-MAY-2018

Interface: Ovid

**Search Strategy: search terms**

- 1 portal vein/
- 2 (Portal vein adj thrombo\*).ti,ab,kw.
- 3 exp Budd Chiari syndrome/
- 4 Budd-Chiari Syndrome.ti,ab,kw.
- 5 splanchnic blood flow/
- 6 (splanchn\* adj Thrombo\*).ti,ab,kw.
- 7 exp mesenteric vein thrombosis/ or mesenteric vein/ or splenic vein/
- 8 ((Mesenteric vein or Mesenteric Venous) adj thrombo\*).ti,ab,kw.
- 9 exp occlusive cerebrovascular disease/
- 10 ((Intracranial or cerebral or sinus) adj Thrombo\*).ti,ab,kw.
- 11 or/1-10
- 12 clinical study/
- 13 exp case control study/
- 14 family study/
- 15 longitudinal study/
- 16 prospective study/
- 17 cross-sectional study/
- 18 cohort analysis/
- 19 follow-up/
- 20 cohort\*.ti,ab.
- 21 cohort\*.ti,ab.
- 22 (cohort adj (study or studies or analys\*)).ti,ab.
- 23 case control.ti,ab.
- 24 ((follow up or observational or uncontrolled or non randomi#ed or nonrandomi#ed or epidemiologic\*)  
adj (study or studies)).ti,ab.
- 25 ((longitudinal or retrospective or prospective or cross sectional) and (study or studies or review or  
analys\* or cohort\*)).ti,ab.
- 26 or/12-25
- 27 random\*.ti,ab.
- 28 trial.ti,ab.
- 29 factorial\*.ti,ab.
- 30 (crossover\* or cross over\*).ti,ab.
- 31 ((doubl\* or singl\*) adj blind\*).ti,ab.
- 32 (assign\* or allocat\* or volunteer\* or placebo\*).ti,ab.
- 33 placebo.ab.
- 34 crossover procedure/
- 35 single blind procedure/
- 36 randomized controlled trial/
- 37 double blind procedure/
- 38 or/27-37
- 39 animals/ not humans/
- 40 nonhuman/
- 41 exp Animal Experiment/
- 42 exp Experimental Animal/
- 43 animal model/
- 44 exp Rodent/

45 (rat or rats or mouse or mice).ti.  
46 or/39-45  
47 38 not 46  
48 systematic review/  
49 meta-analysis/  
50 (meta analy\* or metanaly\* or metaanaly\*).ti,ab.  
51 (reference list\* or bibliograph\* or hand search\* or manual search\* or relevant journals).ab.  
52 ((systematic\* or evidence\*) adj2 (review\* or overview\*)).ti,ab.  
53 (search strategy or search criteria or systematic search or study selection or data extraction).ab.  
54 (search\* adj4 literature).ab.  
55 (medline or pubmed or cochrane or embase or psychlit or psyclit or psychinfo or psycinfo or cinahl or science citation index or bids or cancerlit).ab.  
56 ((pool\* or combined) adj2 (data or trials or studies or results)).ab.  
57 cochrane.jw.  
58 or/48-57  
59 animals/ not humans/  
60 nonhuman/  
61 exp Animal Experiment/  
62 exp Experimental Animal/  
63 animal model/  
64 exp Rodent/  
65 (rat or rats or mouse or mice).ti.  
66 or/59-65  
67 58 not 66  
68 11 and 67  
69 limit 68 to yr="2006 -Current"  
70 11 and 47  
71 70 not 68  
72 limit 71 to yr="2006 -Current"  
73 26 not 66  
74 11 and 73  
75 limit 74 to yr="2006 -Current"  
76 69 or 72 or 75

Database: Cochrane Library

Date most recent search: 18-MAY-2018

**Search Strategy: search terms**

- #1 MeSH descriptor: [Portal Vein] explode all trees
- #2 (Portal vein near thrombo\*)
- #3 MeSH descriptor: [Budd-Chiari Syndrome] explode all trees
- #4 (Budd-Chiari Syndrome)
- #5 MeSH descriptor: [Splanchnic Circulation] this term only
- #6 (splanchn\* near Thrombo\*)
- #7 MeSH descriptor: [Mesenteric Veins] this term only
- #8 ((Mesenteric vein or Mesenteric Venous) near thrombo\*):ti,ab,kw
- #9 MeSH descriptor: [Intracranial Thrombosis] explode all trees
- #10 ((Intracranial or cerebral or sinus) near Thrombo\*):ti,ab,kw
- #11 #1 or #2 or #3 or #4 or #5 or #6 or #7 or #8 or #9 or #10

**Systematic reviews or observational studies on prognosis of thrombophilia – Expanded search terms for prognosis and additional terms for unusual site thrombosis:**

| Database:                            | Ovid MEDLINE(R) Epub Ahead of Print, In-Process & Other Non-Indexed Citations, Ovid MEDLINE(R) Daily, Ovid MEDLINE and Versions(R) <1946 to present> |
|--------------------------------------|------------------------------------------------------------------------------------------------------------------------------------------------------|
| Date most recent search:             | 07-MAR-2018                                                                                                                                          |
| Interface:                           | Ovid                                                                                                                                                 |
| <b>Search Strategy: search terms</b> |                                                                                                                                                      |
| #                                    | Searches                                                                                                                                             |
| 1                                    | exp Risk/                                                                                                                                            |
| 2                                    | exp Risk Assessment/                                                                                                                                 |
| 3                                    | exp risk factors/                                                                                                                                    |
| 4                                    | exp Prognosis/                                                                                                                                       |
| 5                                    | "Predictive Value of Tests"/                                                                                                                         |
| 6                                    | (risk or prognos* or predict* or probability).ti,ab,kw.                                                                                              |
| 7                                    | 1 or 2 or 3 or 4 or 5 or 6                                                                                                                           |
| 8                                    | exp Thromboembolism/ or exp Venous Thromboembolism/                                                                                                  |
| 9                                    | exp Pulmonary Embolism/                                                                                                                              |
| 10                                   | exp Venous Thrombosis/                                                                                                                               |
| 11                                   | Thrombophlebitis/                                                                                                                                    |
| 12                                   | (DVT or VTE or PE).mp.                                                                                                                               |
| 13                                   | ((Pulmon\$ or vein or venous or lung) adj (Emboli\$ or thromb\$)).mp.                                                                                |
| 14                                   | (thrombus* or thrombotic* or thrombolic* or thromboemboli* or thrombos* or embol*).mp.                                                               |
| 15                                   | ((((deep or thromb* or stasis) adj2 (vein* or venous)) or (blood flow stasis or blood clot)).mp.                                                     |
| 16                                   | or/8-15                                                                                                                                              |
| 17                                   | meta-analysis/                                                                                                                                       |
| 18                                   | meta-analysis as topic/                                                                                                                              |
| 19                                   | (meta analy* or metanaly* or metaanaly*).ti,ab.                                                                                                      |
| 20                                   | (reference list* or bibliograph* or hand search* or manual search* or relevant journals).ab.                                                         |
| 21                                   | ((systematic* or evidence*) adj2 (review* or overview*)).ti,ab.                                                                                      |
| 22                                   | (search strategy or search criteria or systematic search or study selection or data extraction).ab.                                                  |
| 23                                   | (search* adj4 literature).ab.                                                                                                                        |



|    |                                                                                                                                                                                                                                                                                                                                                                                                                                                                        |
|----|------------------------------------------------------------------------------------------------------------------------------------------------------------------------------------------------------------------------------------------------------------------------------------------------------------------------------------------------------------------------------------------------------------------------------------------------------------------------|
| 24 | (medline or pubmed or cochrane or embase or psychlit or psyclit or psychinfo or psycinfo or cinahl or science citation index or bids or cancerlit).ab.                                                                                                                                                                                                                                                                                                                 |
| 25 | ((pool* or combined) adj2 (data or trials or studies or results)).ab.                                                                                                                                                                                                                                                                                                                                                                                                  |
| 26 | cochrane.jw.                                                                                                                                                                                                                                                                                                                                                                                                                                                           |
| 27 | or/17-26                                                                                                                                                                                                                                                                                                                                                                                                                                                               |
| 28 | animals/ not humans/                                                                                                                                                                                                                                                                                                                                                                                                                                                   |
| 29 | exp Animals, Laboratory/                                                                                                                                                                                                                                                                                                                                                                                                                                               |
| 30 | exp Animal Experimentation/                                                                                                                                                                                                                                                                                                                                                                                                                                            |
| 31 | exp Models, Animal/                                                                                                                                                                                                                                                                                                                                                                                                                                                    |
| 32 | exp Rodentia/                                                                                                                                                                                                                                                                                                                                                                                                                                                          |
| 33 | (rat or rats or mouse or mice).ti.                                                                                                                                                                                                                                                                                                                                                                                                                                     |
| 34 | or/28-33                                                                                                                                                                                                                                                                                                                                                                                                                                                               |
| 35 | 27 not 34                                                                                                                                                                                                                                                                                                                                                                                                                                                              |
| 36 | exp Thrombophilia/                                                                                                                                                                                                                                                                                                                                                                                                                                                     |
| 37 | Activated Protein C Resistance/                                                                                                                                                                                                                                                                                                                                                                                                                                        |
| 38 | Antithrombin III Deficiency/                                                                                                                                                                                                                                                                                                                                                                                                                                           |
| 39 | protein c deficiency/                                                                                                                                                                                                                                                                                                                                                                                                                                                  |
| 40 | Protein S Deficiency/                                                                                                                                                                                                                                                                                                                                                                                                                                                  |
| 41 | exp Factor VIII/                                                                                                                                                                                                                                                                                                                                                                                                                                                       |
| 42 | exp Antibodies, Antiphospholipid/                                                                                                                                                                                                                                                                                                                                                                                                                                      |
| 43 | prothrombin/                                                                                                                                                                                                                                                                                                                                                                                                                                                           |
| 44 | beta 2-Glycoprotein I/                                                                                                                                                                                                                                                                                                                                                                                                                                                 |
| 45 | "Methylenetetrahydrofolate Reductase (NADPH2)"/                                                                                                                                                                                                                                                                                                                                                                                                                        |
| 46 | ((prothrombin adj (G20210A or "20210")) or (protein C adj (deficienc\$ or resistance)) or protein S deficienc\$ or ((antithrombin or anti thrombin) adj deficienc\$) or (factor adj (VIII or V leiden or II leiden or II G20210A)) or (lupus adj (coagulation inhibitor or anticoagulant)) or (antibod\$ adj1 (antiphospholipid or anticardiolipin)) or at III or apc resistance or anti-beta2 glycoprotein or Methylenetetrahydrofolate reductase or mthfr).ti,ab,kw. |
| 47 | (thrombophil* or hypercoagul*).mp.                                                                                                                                                                                                                                                                                                                                                                                                                                     |
| 48 | or/36-47                                                                                                                                                                                                                                                                                                                                                                                                                                                               |
| 49 | exp pregnancy/                                                                                                                                                                                                                                                                                                                                                                                                                                                         |
| 50 | exp Pregnancy Trimesters/                                                                                                                                                                                                                                                                                                                                                                                                                                              |

|    |                                                                                                                                                                                                                                                                                                            |
|----|------------------------------------------------------------------------------------------------------------------------------------------------------------------------------------------------------------------------------------------------------------------------------------------------------------|
| 51 | exp pregnancy complication/                                                                                                                                                                                                                                                                                |
| 52 | exp prenatal care/                                                                                                                                                                                                                                                                                         |
| 53 | exp Preconception Care/                                                                                                                                                                                                                                                                                    |
| 54 | exp peripartum period/                                                                                                                                                                                                                                                                                     |
| 55 | exp perinatal care/                                                                                                                                                                                                                                                                                        |
| 56 | ((Pregnanc* adj Complication* adj Hematologic*) or (Complicatio* adj Hematologic* adj Pregnanc*) or (Hematologic* adj Pregnanc* adj Complicatio*) or (Hematologic* adj Complicatio* adj Pregnanc*) or (Complication* adj Pregnanc* adj Hematologic*) or (Pregnanc* adj Hematologic* adj Complicatio*)).mp. |
| 57 | (antenatal* or "ante natal*" or antepart* or "ante part*" or ((first or second or third) adj1 trimester*) or labor or laboring or labour or labouring or maternal* or obstetric* or perinatal* or "peri natal*" or pregnan* or prenatal* or "pre nat*" or puerperal* or puerperium*).ti,ab,kw.             |
| 58 | 49 or 50 or 51 or 52 or 53 or 54 or 55 or 56 or 57                                                                                                                                                                                                                                                         |
| 59 | (cascade or first-degree or family or relatives).ti,ab.                                                                                                                                                                                                                                                    |
| 60 | *Contraceptives, Oral/                                                                                                                                                                                                                                                                                     |
| 61 | *Hormone Replacement Therapy/                                                                                                                                                                                                                                                                              |
| 62 | *estrogen replacement therapy/                                                                                                                                                                                                                                                                             |
| 63 | ((hormone or estrogen or oestrogen) adj1 (replacement or therap* or substitut*)).mp.                                                                                                                                                                                                                       |
| 64 | (oral adj1 (contraceptive* or contraception)).mp.                                                                                                                                                                                                                                                          |
| 65 | or/60-64                                                                                                                                                                                                                                                                                                   |
| 66 | (Arterial adj1 thromb*).ti,ab,kw.                                                                                                                                                                                                                                                                          |
| 67 | exp Mesenteric Vascular Occlusion/                                                                                                                                                                                                                                                                         |
| 68 | exp Mesenteric Ischemia/                                                                                                                                                                                                                                                                                   |
| 69 | (Mesenteric vein thrombosis or Mesenteric venous thrombosis).mp.                                                                                                                                                                                                                                           |
| 70 | (Mesenteric vein adj thrombo*).ti,ab,kw.                                                                                                                                                                                                                                                                   |
| 71 | exp Mesenteric Veins/                                                                                                                                                                                                                                                                                      |
| 72 | exp Thrombosis/                                                                                                                                                                                                                                                                                            |
| 73 | 71 and 72                                                                                                                                                                                                                                                                                                  |
| 74 | 67 or 68 or 69 or 70 or 73                                                                                                                                                                                                                                                                                 |
| 75 | epidemiologic studies/                                                                                                                                                                                                                                                                                     |
| 76 | exp case control studies/                                                                                                                                                                                                                                                                                  |
| 77 | exp cohort studies/                                                                                                                                                                                                                                                                                        |
| 78 | cross-sectional studies/                                                                                                                                                                                                                                                                                   |

|     |                                                                                                                                   |
|-----|-----------------------------------------------------------------------------------------------------------------------------------|
| 79  | case control.ti,ab.                                                                                                               |
| 80  | (cohort adj (study or studies or analys*)).ti,ab.                                                                                 |
| 81  | ((follow up or observational or uncontrolled or non randomi#ed or nonrandomi#ed or epidemiologic*) adj (study or studies)).ti,ab. |
| 82  | ((longitudinal or retrospective or prospective or cross sectional) and (study or studies or review or analys* or cohort*)).ti,ab. |
| 83  | or/75-82                                                                                                                          |
| 84  | registry.mp. or Registries/                                                                                                       |
| 85  | dataset.mp. or Dataset/                                                                                                           |
| 86  | database.mp. or Database Management Systems/                                                                                      |
| 87  | exp Cohort Studies/                                                                                                               |
| 88  | (cohort adj (study or studies or analys*)).ti,ab.                                                                                 |
| 89  | ((follow up or temporal or trend*) adj (study or studies)).ti,ab.                                                                 |
| 90  | ((longitudinal or retrospective or prospective) and (study or studies or review or analys* or cohort*)).ti,ab.                    |
| 91  | "follow-up".mp.                                                                                                                   |
| 92  | predict*.mp.                                                                                                                      |
| 93  | incidence.mp. or Incidence/                                                                                                       |
| 94  | or/84-93                                                                                                                          |
| 95  | 7 and 48 and 94                                                                                                                   |
| 96  | 58 or 59 or 65 or 66 or 74                                                                                                        |
| 97  | 16 and 96                                                                                                                         |
| 98  | 95 and 97                                                                                                                         |
| 99  | 35 and 98                                                                                                                         |
| 100 | 83 and 98                                                                                                                         |
| 101 | 100 not 99                                                                                                                        |
| 102 | 99 or 101                                                                                                                         |

| Database:                            | Embase <1996 to present>                                                                                                                                                                                                                                                                                                                                                                                                                                               |
|--------------------------------------|------------------------------------------------------------------------------------------------------------------------------------------------------------------------------------------------------------------------------------------------------------------------------------------------------------------------------------------------------------------------------------------------------------------------------------------------------------------------|
| Date most recent search:             | 07-MAR-2018                                                                                                                                                                                                                                                                                                                                                                                                                                                            |
| Interface:                           | Ovid                                                                                                                                                                                                                                                                                                                                                                                                                                                                   |
| <b>Search Strategy: search terms</b> |                                                                                                                                                                                                                                                                                                                                                                                                                                                                        |
| #                                    | Searches                                                                                                                                                                                                                                                                                                                                                                                                                                                               |
| 1                                    | exp Thrombophilia/                                                                                                                                                                                                                                                                                                                                                                                                                                                     |
| 2                                    | Activated Protein C Resistance/                                                                                                                                                                                                                                                                                                                                                                                                                                        |
| 3                                    | Antithrombin III Deficiency/                                                                                                                                                                                                                                                                                                                                                                                                                                           |
| 4                                    | blood clotting factor 5 deficiency/                                                                                                                                                                                                                                                                                                                                                                                                                                    |
| 5                                    | protein c deficiency/                                                                                                                                                                                                                                                                                                                                                                                                                                                  |
| 6                                    | Protein S Deficiency/                                                                                                                                                                                                                                                                                                                                                                                                                                                  |
| 7                                    | exp Factor VIII/ or blood clotting factor 8/                                                                                                                                                                                                                                                                                                                                                                                                                           |
| 8                                    | exp Antibodies, Antiphospholipid/                                                                                                                                                                                                                                                                                                                                                                                                                                      |
| 9                                    | phospholipid antibody/                                                                                                                                                                                                                                                                                                                                                                                                                                                 |
| 10                                   | cardiolipin antibody/                                                                                                                                                                                                                                                                                                                                                                                                                                                  |
| 11                                   | prothrombin/                                                                                                                                                                                                                                                                                                                                                                                                                                                           |
| 12                                   | beta 2-Glycoprotein I/                                                                                                                                                                                                                                                                                                                                                                                                                                                 |
| 13                                   | lupus anticoagulant/                                                                                                                                                                                                                                                                                                                                                                                                                                                   |
| 14                                   | "Methylenetetrahydrofolate Reductase (NADPH2)"/                                                                                                                                                                                                                                                                                                                                                                                                                        |
| 15                                   | ((prothrombin adj (G20210A or "20210")) or (protein C adj (deficienc\$ or resistance)) or protein S deficienc\$ or ((antithrombin or anti thrombin) adj deficienc\$) or (factor adj (VIII or V leiden or II leiden or II G20210A)) or (lupus adj (coagulation inhibitor or anticoagulant)) or (antibod\$ adj1 (antiphospholipid or anticardiolipin)) or at III or apc resistance or anti-beta2 glycoprotein or Methylenetetrahydrofolate reductase or mthfr).ti,ab,kw. |
| 16                                   | (thrombophil* or hypercoagul*).mp.                                                                                                                                                                                                                                                                                                                                                                                                                                     |
| 17                                   | or/1-16                                                                                                                                                                                                                                                                                                                                                                                                                                                                |
| 18                                   | exp pregnancy/                                                                                                                                                                                                                                                                                                                                                                                                                                                         |
| 19                                   | first trimester pregnancy/ or second trimester pregnancy/ or third trimester pregnancy/                                                                                                                                                                                                                                                                                                                                                                                |
| 20                                   | exp pregnancy complication/                                                                                                                                                                                                                                                                                                                                                                                                                                            |
| 21                                   | exp prenatal care/                                                                                                                                                                                                                                                                                                                                                                                                                                                     |
| 22                                   | exp maternal care/                                                                                                                                                                                                                                                                                                                                                                                                                                                     |
| 23                                   | exp perinatal period/                                                                                                                                                                                                                                                                                                                                                                                                                                                  |

|    |                                                                                                                                                                                                                                                                                                          |
|----|----------------------------------------------------------------------------------------------------------------------------------------------------------------------------------------------------------------------------------------------------------------------------------------------------------|
| 24 | exp perinatal care/                                                                                                                                                                                                                                                                                      |
| 25 | ((Pregnanc* adj Complicatio* adj Hematologic*) or (Complicatio* adj Hematologic* adj Pregnanc*) or (Hematologic* adj Pregnanc* adj Complicatio*) or (Hematologic* adj Complicatio* adj Pregnanc*) or (Complicatio* adj Pregnanc* adj Hematologic*) or (Pregnanc* adj Hematologic* adj Complicatio*)).mp. |
| 26 | (antenatal* or "ante natal*" or antepart* or "ante part*" or ((first or second or third) adj1 trimester*) or labor or laboring or labour or labouring or maternal* or obstetric* or perinatal* or "peri natal*" or pregnan* or prenatal* or "pre nat*" or puerperal* or puerperium*).mp.                 |
| 27 | 18 or 19 or 20 or 21 or 22 or 23 or 24 or 25 or 26                                                                                                                                                                                                                                                       |
| 28 | (cascade or first-degree or family or relatives).ti,ab,kw.                                                                                                                                                                                                                                               |
| 29 | *contraceptives, oral/                                                                                                                                                                                                                                                                                   |
| 30 | *oral contraceptive agent/                                                                                                                                                                                                                                                                               |
| 31 | *hormone replacement therapy/                                                                                                                                                                                                                                                                            |
| 32 | *estrogen replacement therapy/                                                                                                                                                                                                                                                                           |
| 33 | *hormone substitution/                                                                                                                                                                                                                                                                                   |
| 34 | *estrogen therapy/                                                                                                                                                                                                                                                                                       |
| 35 | ((hormone or estrogen or oestrogen) adj1 (replacement or therap* or substitut*)).mp.                                                                                                                                                                                                                     |
| 36 | (oral adj1 (contraceptive* or contraception)).mp.                                                                                                                                                                                                                                                        |
| 37 | 29 or 30 or 31 or 32 or 33 or 34 or 35 or 36                                                                                                                                                                                                                                                             |
| 38 | (Arterial adj1 thromb*).ti,ab,kw.                                                                                                                                                                                                                                                                        |
| 39 | exp mesenteric blood vessel occlusion/                                                                                                                                                                                                                                                                   |
| 40 | exp mesenteric ischemia/                                                                                                                                                                                                                                                                                 |
| 41 | Mesenteric vein thrombosis.mp.                                                                                                                                                                                                                                                                           |
| 42 | Mesenteric venous thrombosis.mp.                                                                                                                                                                                                                                                                         |
| 43 | (Mesenteric vein adj thrombo*).ti,ab,kw.                                                                                                                                                                                                                                                                 |
| 44 | exp mesenteric vein/                                                                                                                                                                                                                                                                                     |
| 45 | exp thrombosis/                                                                                                                                                                                                                                                                                          |
| 46 | 44 and 45                                                                                                                                                                                                                                                                                                |
| 47 | 39 or 40 or 41 or 42 or 43 or 46                                                                                                                                                                                                                                                                         |
| 48 | 27 or 28 or 37 or 38 or 47                                                                                                                                                                                                                                                                               |
| 49 | 17 and 48                                                                                                                                                                                                                                                                                                |
| 50 | exp risk/                                                                                                                                                                                                                                                                                                |

|    |                                                                                                                |
|----|----------------------------------------------------------------------------------------------------------------|
| 51 | exp risk factor/ or exp risk assessment/                                                                       |
| 52 | exp prognosis/                                                                                                 |
| 53 | predictive value/                                                                                              |
| 54 | (risk or prognos* or predict* or probability).ti,ab,kw.                                                        |
| 55 | register/                                                                                                      |
| 56 | data base/                                                                                                     |
| 57 | database management system/                                                                                    |
| 58 | (register or data base or database or dataset).mp.                                                             |
| 59 | exp cohort analysis/                                                                                           |
| 60 | (cohort adj (study or studies or analys*)).ti,ab.                                                              |
| 61 | ((follow up or temporal or trend*) adj (study or studies)).ti,ab.                                              |
| 62 | ((longitudinal or retrospective or prospective) and (study or studies or review or analys* or cohort*)).ti,ab. |
| 63 | "follow-up".mp.                                                                                                |
| 64 | predict*.mp.                                                                                                   |
| 65 | incidence/ or Incidence.mp.                                                                                    |
| 66 | 55 or 56 or 57 or 58 or 59 or 60 or 61 or 62 or 63 or 64 or 65                                                 |
| 67 | 50 or 51 or 52 or 53 or 54                                                                                     |
| 68 | 66 and 67                                                                                                      |
| 69 | clinical study/                                                                                                |
| 70 | exp case control study/                                                                                        |
| 71 | family study/                                                                                                  |
| 72 | longitudinal study/                                                                                            |
| 73 | prospective study/                                                                                             |
| 74 | cross-sectional study/                                                                                         |
| 75 | cohort analysis/                                                                                               |
| 76 | follow-up/                                                                                                     |
| 77 | cohort*.ti,ab.                                                                                                 |
| 78 | cohort*.ti,ab.                                                                                                 |
| 79 | (cohort adj (study or studies or analys*)).ti,ab.                                                              |
| 80 | case control.ti,ab.                                                                                            |

|     |                                                                                                                                                        |
|-----|--------------------------------------------------------------------------------------------------------------------------------------------------------|
| 81  | ((follow up or observational or uncontrolled or non randomi#ed or nonrandomi#ed or epidemiologic*) adj (study or studies)).ti,ab.                      |
| 82  | ((longitudinal or retrospective or prospective or cross sectional) and (study or studies or review or analys* or cohort*)).ti,ab.                      |
| 83  | 69 or 70 or 71 or 72 or 73 or 74 or 75 or 76 or 77 or 78 or 79 or 80 or 81 or 82                                                                       |
| 84  | systematic review/                                                                                                                                     |
| 85  | meta-analysis/                                                                                                                                         |
| 86  | (meta analy* or metanaly* or metaanaly*).ti,ab.                                                                                                        |
| 87  | (reference list* or bibliograph* or hand search* or manual search* or relevant journals).ab.                                                           |
| 88  | ((systematic* or evidence*) adj2 (review* or overview*)).ti,ab.                                                                                        |
| 89  | (search strategy or search criteria or systematic search or study selection or data extraction).ab.                                                    |
| 90  | (search* adj4 literature).ab.                                                                                                                          |
| 91  | (medline or pubmed or cochrane or embase or psychlit or psyclit or psychinfo or psycinfo or cinahl or science citation index or bids or cancerlit).ab. |
| 92  | ((pool* or combined) adj2 (data or trials or studies or results)).ab.                                                                                  |
| 93  | cochrane.jw.                                                                                                                                           |
| 94  | or/84-93                                                                                                                                               |
| 95  | animals/ not humans/                                                                                                                                   |
| 96  | nonhuman/                                                                                                                                              |
| 97  | exp Animal Experiment/                                                                                                                                 |
| 98  | exp Experimental Animal/                                                                                                                               |
| 99  | animal model/                                                                                                                                          |
| 100 | exp Rodent/                                                                                                                                            |
| 101 | (rat or rats or mouse or mice).ti.                                                                                                                     |
| 102 | 95 or 96 or 97 or 98 or 99 or 100 or 101                                                                                                               |
| 103 | 94 not 102                                                                                                                                             |
| 104 | 49 and 68                                                                                                                                              |
| 105 | 103 and 104                                                                                                                                            |
| 106 | 83 and 104                                                                                                                                             |
| 107 | 106 not 105                                                                                                                                            |
| 108 | exp vein thrombosis/                                                                                                                                   |
| 109 | exp Venous Thromboembolism/                                                                                                                            |

|     |                                                                                                  |
|-----|--------------------------------------------------------------------------------------------------|
| 110 | exp 'lung embolism'/'                                                                            |
| 111 | Thrombophlebitis/                                                                                |
| 112 | (PE or DVT or VTE).mp.                                                                           |
| 113 | ((Pulmon\$ or vein or venous or lung) adj (Emboli\$ or thromb\$)).mp.                            |
| 114 | (thrombus* or thrombotic* or thrombolic* or thromboemboli* or thrombos* or embol*).mp.           |
| 115 | ((((deep or thromb* or stasis) adj2 (vein* or venous)) or (blood flow stasis or blood clot)).mp. |
| 116 | or/108-115                                                                                       |
| 117 | 107 and 116                                                                                      |
| 118 | 105 and 116                                                                                      |
| 119 | 117 or 118                                                                                       |



Database: Cochrane library

Date most recent search: 07-MAR-2018

### Search Strategy: search terms

- #1 MeSH descriptor: [Pregnancy] explode all trees
- #2 MeSH descriptor: [Pregnancy Trimesters] explode all trees
- #3 MeSH descriptor: [Pregnancy Complications, Hematologic] explode all trees
- #4 (Pregnanc\* near Complication\* near Hematologic\*) or (Complicatio\* near Hematologic\* near Pregnanc\*) or (Hematologic\* near Pregnanc\* near Complicatio\*) or (Hematologic\* near Complicatio\* near Pregnanc\*) or (Complication\* near Pregnanc\* near Hematologic\*) or (Pregnanc\* near Hematologic\* near Complicatio\*)
- #5 MeSH descriptor: [Prenatal Care] explode all trees
- #6 MeSH descriptor: [Preconception Care] explode all trees
- #7 MeSH descriptor: [Peripartum Period] explode all trees
- #8 MeSH descriptor: [Perinatal Care] this term only
- #9 (antenatal\* or "ante natal\*" or antepart\* or "ante part\*" or ((first or second or third) near/1 trimester\*) or labor or laboring or labour or labouring or maternal\* or obstetric\* or perinatal\* or "peri natal\*" or pregnan\* or prenat\* or "pre nat\*" or puerperal\* or puerperium\*):ti,ab,kw
- #10 #1 or #2 or #3 or #4 or #5 or #6 or #7 or #8 or #9
- #11 MeSH descriptor: [Contraceptives, Oral] explode all trees
- #12 MeSH descriptor: [Hormone Replacement Therapy] explode all trees
- #13 (oral near/1 (contraceptive\* or contraception))
- #14 ((hormone replacement or estrogen or oestrogen) near/1 therap\*)
- #15 ((oestrogen or estrogen) near/1 replacement)
- #16 #11 or #12 or #13 or #14 or #15
- #17 (cascade or first-degree or famil\* or relatives):ti,ab
- #18 (Arterial adj1 thromb\*):ti,ab,kw
- #19 MeSH descriptor: [Mesenteric Vascular Occlusion] explode all trees
- #20 MeSH descriptor: [Mesenteric Ischemia] explode all trees
- #21 (Mesenteric vein thrombosis or Mesenteric venous thrombosis)
- #22 (Mesenteric vein adj thrombo\*):ti,ab,kw
- #23 MeSH descriptor: [Mesenteric Veins] explode all trees
- #24 MeSH descriptor: [Thrombosis] explode all trees
- #25 #19 or #20 or #21 or #22 or #23 or #24
- #26 #10 or #16 or #17 or #18 or #25
- #27 MeSH descriptor: [Thrombophilia] explode all trees
- #28 MeSH descriptor: [Factor VIII] explode all trees
- #29 MeSH descriptor: [Antibodies, Antiphospholipid] explode all trees
- #30 MeSH descriptor: [Prothrombin] this term only
- #31 MeSH descriptor: [beta 2-Glycoprotein I] this term only
- #32 MeSH descriptor: [Methylenetetrahydrofolate Reductase (NADPH2)] this term only
- #33 MeSH descriptor: [Activated Protein C Resistance] this term only
- #34 MeSH descriptor: [Antithrombin III Deficiency] this term only
- #35 MeSH descriptor: [Protein C Deficiency] this term only
- #36 MeSH descriptor: [Protein S Deficiency] this term only
- #37 (thrombophil\* or hypercoagul\*)
- #38 ((prothrombin near (G20210A or "20210")) or (protein C near (deficienc\* or resistance)) or protein S deficienc\* or ((antithrombin or anti thrombin) near deficienc\*) or (factor near (VIII or V leiden or II leiden or II G20210A)) or (lupus near (coagulation inhibitor or anticoagulant)) or (antibod\* near (antiphospholipid or anticardiolipin)) or at III or apc resistance or anti-beta2 glycoprotein or Methylenetetrahydrofolate reductase or mthfr):ti,ab,kw

|     |                                                                                              |
|-----|----------------------------------------------------------------------------------------------|
| #39 | #27 or #28 or #29 or #30 or #31 or #32 or #33 or #34 or #35 or #36 or #37 or #38             |
| #40 | #27 or #28 or #29 or #30 or #31 or #32 or #33 or #34 or #35 or #36 or #37                    |
| #41 | #26 and #39                                                                                  |
| #42 | MeSH descriptor: [Venous Thrombosis] explode all trees                                       |
| #43 | MeSH descriptor: [Thromboembolism] explode all trees                                         |
| #44 | MeSH descriptor: [Venous Thromboembolism] explode all trees                                  |
| #45 | MeSH descriptor: [Pulmonary Embolism] explode all trees                                      |
| #46 | MeSH descriptor: [Thrombophlebitis] this term only                                           |
| #47 | (DVT or VTE or PE)                                                                           |
| #48 | ((Pulmon* or vein or venous or lung) near (Emboli* or thromb*))                              |
| #49 | (Thrombus* or thrombotic* or thrombolic* or thromboemboli* or thrombos* or embol*)           |
| #50 | ((deep or thromb* or stasis) near/2 (vein* or venous)) or (blood flow stasis or blood clot)) |
| #51 | #42 or #43 or #44 or #45 or #46 or #47 or #48 or #49 or #50                                  |
| #52 | #41 and #51 Online Publication Date from Dec 2016 to Mar 2018                                |
| #53 | #41 and #51                                                                                  |

## Systematic reviews or observational studies on thrombophilia related prognosis in cancer patients:

|                                      |                                                                                                                                                                                                                                                                                                                                    |
|--------------------------------------|------------------------------------------------------------------------------------------------------------------------------------------------------------------------------------------------------------------------------------------------------------------------------------------------------------------------------------|
| Database:                            | Medline, and Medline In-Process & Other Non-Indexed Citations (1946-present)<br>Update 1: Ovid MEDLINE(R) Epub Ahead of Print, In-Process & Other Non-Indexed Citations, Ovid MEDLINE(R) Daily, Ovid MEDLINE and Versions(R) <1946 to present>                                                                                     |
| Date most recent search:             | 26-JAN-2018                                                                                                                                                                                                                                                                                                                        |
| Interface:                           | Ovid                                                                                                                                                                                                                                                                                                                               |
| <b>Search Strategy: search terms</b> |                                                                                                                                                                                                                                                                                                                                    |
| 1                                    | exp Risk/                                                                                                                                                                                                                                                                                                                          |
| 2                                    | exp Risk Assessment/                                                                                                                                                                                                                                                                                                               |
| 3                                    | exp risk factors/                                                                                                                                                                                                                                                                                                                  |
| 4                                    | exp Prognosis/                                                                                                                                                                                                                                                                                                                     |
| 5                                    | "Predictive Value of Tests"/                                                                                                                                                                                                                                                                                                       |
| 6                                    | (risk or prognos* or predict* or probability).ti,ab,kw.                                                                                                                                                                                                                                                                            |
| 7                                    | or/1-6                                                                                                                                                                                                                                                                                                                             |
| 8                                    | meta-analysis/                                                                                                                                                                                                                                                                                                                     |
| 9                                    | meta-analysis as topic/                                                                                                                                                                                                                                                                                                            |
| 10                                   | (meta analy* or metanaly* or metaanaly*).ti,ab.                                                                                                                                                                                                                                                                                    |
| 11                                   | (reference list* or bibliograph* or hand search* or manual search* or relevant journals).ab.                                                                                                                                                                                                                                       |
| 12                                   | ((systematic* or evidence*) adj2 (review* or overview*)).ti,ab.                                                                                                                                                                                                                                                                    |
| 13                                   | (search strategy or search criteria or systematic search or study selection or data extraction).ab.                                                                                                                                                                                                                                |
| 14                                   | (search* adj4 literature).ab.                                                                                                                                                                                                                                                                                                      |
| 15                                   | (medline or pubmed or cochrane or embase or psychlit or psyclit or psychinfo or psycinfo or cinahl or science citation index or bids or cancerlit).ab.                                                                                                                                                                             |
| 16                                   | ((pool* or combined) adj2 (data or trials or studies or results)).ab.                                                                                                                                                                                                                                                              |
| 17                                   | cochrane.jw.                                                                                                                                                                                                                                                                                                                       |
| 18                                   | or/8-17                                                                                                                                                                                                                                                                                                                            |
| 19                                   | animals/ not humans/                                                                                                                                                                                                                                                                                                               |
| 20                                   | exp Animals, Laboratory/                                                                                                                                                                                                                                                                                                           |
| 21                                   | exp Animal Experimentation/                                                                                                                                                                                                                                                                                                        |
| 22                                   | exp Models, Animal/                                                                                                                                                                                                                                                                                                                |
| 23                                   | exp Rodentia/                                                                                                                                                                                                                                                                                                                      |
| 24                                   | (rat or rats or mouse or mice).ti.                                                                                                                                                                                                                                                                                                 |
| 25                                   | or/19-24                                                                                                                                                                                                                                                                                                                           |
| 26                                   | 18 not 25                                                                                                                                                                                                                                                                                                                          |
| 27                                   | exp Thrombophilia/                                                                                                                                                                                                                                                                                                                 |
| 28                                   | Activated Protein C Resistance/                                                                                                                                                                                                                                                                                                    |
| 29                                   | Antithrombin III Deficiency/                                                                                                                                                                                                                                                                                                       |
| 30                                   | protein c deficiency/                                                                                                                                                                                                                                                                                                              |
| 31                                   | Protein S Deficiency/                                                                                                                                                                                                                                                                                                              |
| 32                                   | exp Factor VIII/                                                                                                                                                                                                                                                                                                                   |
| 33                                   | exp Antibodies, Antiphospholipid/                                                                                                                                                                                                                                                                                                  |
| 34                                   | prothrombin/                                                                                                                                                                                                                                                                                                                       |
| 35                                   | beta 2-Glycoprotein I/                                                                                                                                                                                                                                                                                                             |
| 36                                   | "Methylenetetrahydrofolate Reductase (NADPH2)"/                                                                                                                                                                                                                                                                                    |
| 37                                   | ((prothrombin adj (G20210A or "20210")) or (protein C adj (deficienc\$ or resistance)) or protein S deficienc\$ or ((antithrombin or anti thrombin) adj deficienc\$) or (factor adj (VIII or V leiden or II leiden or II G20210A)) or (lupus adj (coagulation inhibitor or anticoagulant)) or (antibod\$ adj1 (antiphospholipid or |

anticardiolipin)) or at III or apc resistance or anti-beta2 glycoprotein or Methylenetetrahydrofolate reductase or mthfr).ti,ab,kw.  
38 (thrombophil\* or hypercoagul\*).mp.  
39 or/27-38  
40 epidemiologic studies/  
41 exp case control studies/  
42 exp cohort studies/  
43 cross-sectional studies/  
44 case control.ti,ab.  
45 (cohort adj (study or studies or analys\*)).ti,ab.  
46 ((follow up or observational or uncontrolled or non randomi#ed or nonrandomi#ed or epidemiologic\*)  
adj (study or studies)).ti,ab.  
47 ((longitudinal or retrospective or prospective or cross sectional) and (study or studies or review or analys\*  
or cohort\*)).ti,ab.  
48 or/40-47  
49 registry.mp. or Registries/  
50 dataset.mp. or Dataset/  
51 database.mp. or Database Management Systems/  
52 exp Cohort Studies/  
53 (cohort adj (study or studies or analys\*)).ti,ab.  
54 ((follow up or temporal or trend\*) adj (study or studies)).ti,ab.  
55 ((longitudinal or retrospective or prospective) and (study or studies or review or analys\* or  
cohort\*)).ti,ab.  
56 "follow-up".mp.  
57 predict\*.mp.  
58 incidence.mp. or Incidence/  
59 or/49-58  
60 exp prevalence/  
61 prevalence.ti,ab,kw.  
62 60 or 61  
63 exp Neoplasms/  
64 (malignan\* or neoplasm\* or cancer\* or carcinoma\* or adenocarcinoma\* or tumour\* or tumor\* or  
glioma\* or myeloma\* or lymphoma\* or leukemia\* or epithelioma\* or adenoma\*).tw.  
65 63 or 64  
66 (7 and 59) or 62  
67 66 and 65  
68 39 and 67  
69 26 and 68  
70 48 and 68  
71 70 not 25  
72 71 not 69  
73 71 or 72

Database: Embase <1996 to current>

Date: 26-JAN-2018

Interface: Ovid

**Search Strategy: search terms**

- 1 exp Thrombophilia/
- 2 Activated Protein C Resistance/
- 3 Antithrombin III Deficiency/
- 4 blood clotting factor 5 deficiency/
- 5 protein c deficiency/
- 6 Protein S Deficiency/
- 7 exp Factor VIII/ or blood clotting factor 8/
- 8 exp Antibodies, Antiphospholipid/
- 9 phospholipid antibody/
- 10 cardiolipin antibody/
- 11 prothrombin/
- 12 beta 2-Glycoprotein I/
- 13 lupus anticoagulant/
- 14 "Methylenetetrahydrofolate Reductase (NADPH2)"/
- 15 ((prothrombin adj (G20210A or "20210")) or (protein C adj (deficienc\$ or resistance)) or protein S deficienc\$ or ((antithrombin or anti thrombin) adj deficienc\$) or (factor adj (VIII or V leiden or II leiden or II G20210A)) or (lupus adj (coagulation inhibitor or anticoagulant)) or (antibod\$ adj1 (antiphospholipid or anticardiolipin)) or at III or apc resistance or anti-beta2 glycoprotein or Methylenetetrahydrofolate reductase or mthfr).ti,ab,kw.
- 16 (thrombophil\* or hypercoagul\*).mp.
- 17 or/1-16
- 18 exp risk/
- 19 exp risk factor/ or exp risk assessment/
- 20 exp prognosis/
- 21 predictive value/
- 22 (risk or prognos\* or predict\* or probability).ti,ab,kw.
- 23 register/
- 24 data base/
- 25 database management system/
- 26 (register or data base or database or dataset).mp.
- 27 exp cohort analysis/
- 28 (cohort adj (study or studies or analys\*)).ti,ab.
- 29 ((follow up or temporal or trend\*) adj (study or studies)).ti,ab.
- 30 ((longitudinal or retrospective or prospective) and (study or studies or review or analys\* or cohort\*)).ti,ab.
- 31 "follow-up".mp.
- 32 predict\*.mp.
- 33 incidence/ or Incidence.mp.
- 34 or/23-33
- 35 or/18-22
- 36 34 and 35
- 37 clinical study/
- 38 exp case control study/
- 39 family study/
- 40 longitudinal study/
- 41 prospective study/

42 cross-sectional study/  
43 cohort analysis/  
44 follow-up/  
45 cohort\*.ti,ab.  
46 cohort\*.ti,ab.  
47 (cohort adj (study or studies or analys\*)).ti,ab.  
48 case control.ti,ab.  
49 ((follow up or observational or uncontrolled or non randomi#ed or nonrandomi#ed or epidemiologic\*)  
adj (study or studies)).ti,ab.  
50 ((longitudinal or retrospective or prospective or cross sectional) and (study or studies or review or  
analys\* or cohort\*)).ti,ab.  
51 or/37-50  
52 systematic review/  
53 meta-analysis/  
54 (meta analy\* or metanaly\* or metaanaly\*).ti,ab.  
55 (reference list\* or bibliograph\* or hand search\* or manual search\* or relevant journals).ab.  
56 ((systematic\* or evidence\*) adj2 (review\* or overview\*)).ti,ab  
57 (search strategy or search criteria or systematic search or study selection or data extraction).ab.  
58 (search\* adj4 literature).ab.  
59 (medline or pubmed or cochrane or embase or psychlit or psyclit or psychinfo or psycinfo or cinahl or  
science citation index or bids or cancerlit).ab.  
60 ((pool\* or combined) adj2 (data or trials or studies or results)).ab.  
61 cochrane.jw.  
62 or/52-61  
63 animals/ not humans/  
64 nonhuman/  
65 exp Animal Experiment/  
66 exp Experimental Animal/  
67 animal model/  
68 exp Rodent/  
69 (rat or rats or mouse or mice).ti.  
70 or/63-69  
71 62 not 70  
72 exp neoplasm/  
73 (malignan\* or neoplasm\* or cancer\* or carcinoma\* or adenocarcinoma\* or tumour\* or tumor\* or  
glioma\* or myeloma\* or lymphoma\* or leukemia\* or epithelioma\* or adenoma\*).tw.  
74 72 or 73  
75 exp prevalence/  
76 prevalence.ti,ab,kw.  
77 75 or 76  
78 36 or 77  
79 17 and 74 and 78  
80 71 and 79  
81 51 and 79  
82 81 not 70  
83 82 not 80  
84 80 or 83

Database: Cochrane library

Date most recent search: 26-JAN-2018

**Search Strategy: search terms**

| ID  | Search                                                                                                                                                                                                                                                                                                                                                                                                                                                                 |
|-----|------------------------------------------------------------------------------------------------------------------------------------------------------------------------------------------------------------------------------------------------------------------------------------------------------------------------------------------------------------------------------------------------------------------------------------------------------------------------|
| #1  | MeSH descriptor: [Thrombophilia] explode all trees                                                                                                                                                                                                                                                                                                                                                                                                                     |
| #2  | MeSH descriptor: [Factor VIII] explode all trees                                                                                                                                                                                                                                                                                                                                                                                                                       |
| #3  | MeSH descriptor: [Antibodies, Antiphospholipid] explode all trees                                                                                                                                                                                                                                                                                                                                                                                                      |
| #4  | MeSH descriptor: [Prothrombin] this term only                                                                                                                                                                                                                                                                                                                                                                                                                          |
| #5  | MeSH descriptor: [beta 2-Glycoprotein I] this term only                                                                                                                                                                                                                                                                                                                                                                                                                |
| #6  | MeSH descriptor: [Methylenetetrahydrofolate Reductase (NADPH2)] this term only                                                                                                                                                                                                                                                                                                                                                                                         |
| #7  | MeSH descriptor: [Activated Protein C Resistance] this term only                                                                                                                                                                                                                                                                                                                                                                                                       |
| #8  | MeSH descriptor: [Antithrombin III Deficiency] this term only                                                                                                                                                                                                                                                                                                                                                                                                          |
| #9  | MeSH descriptor: [Protein C Deficiency] this term only                                                                                                                                                                                                                                                                                                                                                                                                                 |
| #10 | MeSH descriptor: [Protein S Deficiency] this term only                                                                                                                                                                                                                                                                                                                                                                                                                 |
| #11 | (thrombophil* or hypercoagul*)                                                                                                                                                                                                                                                                                                                                                                                                                                         |
| #12 | ((prothrombin near (G20210A or "20210")) or (protein C near (deficienc* or resistance)) or protein S deficienc* or ((antithrombin or anti thrombin) near deficienc*) or (factor near (VIII or V leiden or II leiden or II G20210A)) or (lupus near (coagulation inhibitor or anticoagulant)) or (antibod* near (antiphospholipid or anticardiolipin)) or at III or apc resistance or anti-beta2 glycoprotein or Methylenetetrahydrofolate reductase or mthfr):ti,ab,kw |
| #13 | #1 or #2 or #3 or #4 or #5 or #6 or #7 or #8 or #9 or #10 or #11 or #12                                                                                                                                                                                                                                                                                                                                                                                                |
| #14 | #1 or #2 or #3 or #4 or #5 or #6 or #7 or #8 or #9 or #10 or #11                                                                                                                                                                                                                                                                                                                                                                                                       |
| #15 | MeSH descriptor: [Venous Thrombosis] explode all trees                                                                                                                                                                                                                                                                                                                                                                                                                 |
| #16 | MeSH descriptor: [Thromboembolism] explode all trees                                                                                                                                                                                                                                                                                                                                                                                                                   |
| #17 | MeSH descriptor: [Venous Thromboembolism] explode all trees                                                                                                                                                                                                                                                                                                                                                                                                            |
| #18 | MeSH descriptor: [Pulmonary Embolism] explode all trees                                                                                                                                                                                                                                                                                                                                                                                                                |
| #19 | MeSH descriptor: [Thrombophlebitis] this term only                                                                                                                                                                                                                                                                                                                                                                                                                     |
| #20 | (DVT or VTE or PE)                                                                                                                                                                                                                                                                                                                                                                                                                                                     |
| #21 | ((Pulmon* or vein or venous or lung) near (Emboli* or thromb*))                                                                                                                                                                                                                                                                                                                                                                                                        |
| #22 | (Thrombus* or thrombotic* or thrombolic* or thromboemboli* or thrombos* or embol*)                                                                                                                                                                                                                                                                                                                                                                                     |
| #23 | ((((deep or thromb* or stasis) near/2 (vein* or venous)) or (blood flow stasis or blood clot))                                                                                                                                                                                                                                                                                                                                                                         |
| #24 | #15 or #16 or #17 or #18 or #19 or #20 or #21 or #22 or #23                                                                                                                                                                                                                                                                                                                                                                                                            |
| #25 | MeSH descriptor: [Neoplasms] explode all trees                                                                                                                                                                                                                                                                                                                                                                                                                         |
| #26 | (malignan* or neoplasm* or cancer* or carcinoma* or adenocarcinoma* or tumour* or tumor* or glioma* or myeloma* or lymphoma* or leukemia* or epithelioma* or adenoma*)                                                                                                                                                                                                                                                                                                 |
| #27 | #25 or #26                                                                                                                                                                                                                                                                                                                                                                                                                                                             |
| #28 | #13 and #27                                                                                                                                                                                                                                                                                                                                                                                                                                                            |

**Systematic reviews, observational studies and randomized controlled trials related to thrombophilia in women who are candidates for combined oral contraceptives or hormone replacement therapy:**

|                                      |                                                                                                                                                                                                                                                                                                                                                                                                                                                                        |
|--------------------------------------|------------------------------------------------------------------------------------------------------------------------------------------------------------------------------------------------------------------------------------------------------------------------------------------------------------------------------------------------------------------------------------------------------------------------------------------------------------------------|
| Database:                            | Ovid MEDLINE(R) Epub Ahead of Print, In-Process & Other Non-Indexed Citations, Ovid MEDLINE(R) Daily, Ovid MEDLINE and Versions(R) <1946 to present>                                                                                                                                                                                                                                                                                                                   |
| Date most recent search:             | 05-JUN-2018                                                                                                                                                                                                                                                                                                                                                                                                                                                            |
| Interface:                           | Ovid                                                                                                                                                                                                                                                                                                                                                                                                                                                                   |
| <b>Search Strategy: search terms</b> |                                                                                                                                                                                                                                                                                                                                                                                                                                                                        |
| 1                                    | exp Thromboembolism/ or exp Venous Thromboembolism/                                                                                                                                                                                                                                                                                                                                                                                                                    |
| 2                                    | exp Pulmonary Embolism/                                                                                                                                                                                                                                                                                                                                                                                                                                                |
| 3                                    | exp Venous Thrombosis/                                                                                                                                                                                                                                                                                                                                                                                                                                                 |
| 4                                    | Thrombophlebitis/                                                                                                                                                                                                                                                                                                                                                                                                                                                      |
| 5                                    | (DVT or VTE or PE).mp.                                                                                                                                                                                                                                                                                                                                                                                                                                                 |
| 6                                    | ((Pulmon\$ or vein or venous or lung) adj (Emboli\$ or thromb\$)).mp.                                                                                                                                                                                                                                                                                                                                                                                                  |
| 7                                    | (thrombus* or thrombotic* or thrombolic* or thromboemboli* or thrombos* or embol*).mp.                                                                                                                                                                                                                                                                                                                                                                                 |
| 8                                    | ((deep or thromb* or stasis) adj2 (vein* or venous)) or (blood flow stasis or blood clot).mp.                                                                                                                                                                                                                                                                                                                                                                          |
| 9                                    | or/1-8                                                                                                                                                                                                                                                                                                                                                                                                                                                                 |
| 10                                   | exp Thrombophilia/                                                                                                                                                                                                                                                                                                                                                                                                                                                     |
| 11                                   | Activated Protein C Resistance/                                                                                                                                                                                                                                                                                                                                                                                                                                        |
| 12                                   | Antithrombin III Deficiency/                                                                                                                                                                                                                                                                                                                                                                                                                                           |
| 13                                   | protein c deficiency/                                                                                                                                                                                                                                                                                                                                                                                                                                                  |
| 14                                   | Protein S Deficiency/                                                                                                                                                                                                                                                                                                                                                                                                                                                  |
| 15                                   | exp Factor VIII/                                                                                                                                                                                                                                                                                                                                                                                                                                                       |
| 16                                   | exp Antibodies, Antiphospholipid/                                                                                                                                                                                                                                                                                                                                                                                                                                      |
| 17                                   | prothrombin/                                                                                                                                                                                                                                                                                                                                                                                                                                                           |
| 18                                   | beta 2-Glycoprotein I/                                                                                                                                                                                                                                                                                                                                                                                                                                                 |
| 19                                   | "Methylenetetrahydrofolate Reductase (NADPH2)"/                                                                                                                                                                                                                                                                                                                                                                                                                        |
| 20                                   | ((prothrombin adj (G20210A or "20210")) or (protein C adj (deficienc\$ or resistance)) or protein S deficienc\$ or ((antithrombin or anti thrombin) adj deficienc\$) or (factor adj (VIII or V leiden or II leiden or II G20210A)) or (lupus adj (coagulation inhibitor or anticoagulant)) or (antibod\$ adj1 (antiphospholipid or anticardiolipin)) or at III or apc resistance or anti-beta2 glycoprotein or Methylenetetrahydrofolate reductase or mthfr).ti,ab,kw. |
| 21                                   | (thrombophil* or hypercoagul*).mp.                                                                                                                                                                                                                                                                                                                                                                                                                                     |
| 22                                   | or/10-21                                                                                                                                                                                                                                                                                                                                                                                                                                                               |
| 23                                   | *Contraceptives, Oral/                                                                                                                                                                                                                                                                                                                                                                                                                                                 |
| 24                                   | *Hormone Replacement Therapy/                                                                                                                                                                                                                                                                                                                                                                                                                                          |
| 25                                   | *estrogen replacement therapy/                                                                                                                                                                                                                                                                                                                                                                                                                                         |
| 26                                   | ((hormone or estrogen or oestrogen) adj1 (replacement or therap* or substitut*)).mp.                                                                                                                                                                                                                                                                                                                                                                                   |
| 27                                   | (oral adj1 (contraceptive* or contraception)).mp.                                                                                                                                                                                                                                                                                                                                                                                                                      |
| 28                                   | or/23-27                                                                                                                                                                                                                                                                                                                                                                                                                                                               |
| 29                                   | 28 and (9 or 22)                                                                                                                                                                                                                                                                                                                                                                                                                                                       |
| 30                                   | epidemiologic studies/                                                                                                                                                                                                                                                                                                                                                                                                                                                 |
| 31                                   | exp case control studies/                                                                                                                                                                                                                                                                                                                                                                                                                                              |
| 32                                   | exp cohort studies/                                                                                                                                                                                                                                                                                                                                                                                                                                                    |
| 33                                   | cross-sectional studies/                                                                                                                                                                                                                                                                                                                                                                                                                                               |



34 case control.ti,ab.  
35 (cohort adj (study or studies or analys\*)).ti,ab.  
36 ((follow up or observational or uncontrolled or non randomi#ed or nonrandomi#ed or epidemiologic\*) adj (study or studies)).ti,ab.  
37 ((longitudinal or retrospective or prospective or cross sectional) and (study or studies or review or analys\* or cohort\*)).ti,ab.  
38 or/30-37  
39 meta-analysis/  
40 meta-analysis as topic/  
41 (meta analy\* or metanaly\* or metaanaly\*).ti,ab.  
42 (reference list\* or bibliograph\* or hand search\* or manual search\* or relevant journals).ab.  
43 ((systematic\* or evidence\*) adj2 (review\* or overview\*)).ti,ab.  
44 (search strategy or search criteria or systematic search or study selection or data extraction).ab.  
45 (search\* adj4 literature).ab.  
46 (medline or pubmed or cochrane or embase or psychlit or psyclit or psychinfo or psycinfo or cinahl or science citation index or bids or cancerlit).ab.  
47 ((pool\* or combined) adj2 (data or trials or studies or results)).ab.  
48 cochrane.jw.  
49 or/39-48  
50 animals/ not humans/  
51 exp Animals, Laboratory/  
52 exp Animal Experimentation/  
53 exp Models, Animal/  
54 exp Rodentia/  
55 (rat or rats or mouse or mice).ti.  
56 or/50-55  
57 49 not 56  
58 randomized controlled trial.pt.  
59 controlled clinical trial.pt.  
60 Clinical Trials as topic.sh.  
61 trial.ti,ab.  
62 factorial\*.ti,ab.  
63 (crossover\* or cross over\*).ti,ab.  
64 ((doubl\* or singl\*) adj blind\*).ti,ab.  
65 (assign\* or allocat\* or volunteer\* or placebo\*).ti,ab.  
66 placebo.ab.  
67 random\*.ti,ab.  
68 or/58-67  
69 animals/ not humans/  
70 exp Animals, Laboratory/  
71 exp Animal Experimentation/  
72 exp Models, Animal/  
73 exp Rodentia/  
74 (rat or rats or mouse or mice).ti.  
75 or/69-74  
76 68 not 75  
77 29 and 57  
78 29 and 76

|    |                    |
|----|--------------------|
| 79 | 29 and (38 not 56) |
| 80 | or/77-79           |

Database: Embase <1996 to present>

Date most recent search: 05-JUN-2018

Interface: Ovid

### Search Strategy: search terms

- 1 systematic review/
- 2 meta-analysis/
- 3 (meta analy\* or metanaly\* or metaanaly\*).ti,ab.
- 4 (reference list\* or bibliograph\* or hand search\* or manual search\* or relevant journals).ab.
- 5 ((systematic\* or evidence\*) adj2 (review\* or overview\*)).ti,ab.
- 6 (search strategy or search criteria or systematic search or study selection or data extraction).ab.
- 7 (search\* adj4 literature).ab.
- 8 (medline or pubmed or cochrane or embase or psychlit or psyclit or psychinfo or psycinfo or cinahl or science citation index or bids or cancerlit).ab.
- 9 ((pool\* or combined) adj2 (data or trials or studies or results)).ab.
- 10 cochrane.jw.
- 11 or/1-10
- 12 clinical study/
- 13 exp case control study/
- 14 family study/
- 15 longitudinal study/
- 16 prospective study/
- 17 cross-sectional study/
- 18 cohort analysis/
- 19 follow-up/
- 20 cohort\*.ti,ab.
- 21 cohort\*.ti,ab.
- 22 (cohort adj (study or studies or analys\*)).ti,ab.
- 23 case control.ti,ab.
- 24 ((follow up or observational or uncontrolled or non randomi#ed or nonrandomi#ed or epidemiologic\*) adj (study or studies)).ti,ab.
- 25 ((longitudinal or retrospective or prospective or cross sectional) and (study or studies or review or analys\* or cohort\*)).ti,ab.
- 26 or/12-25
- 27 exp vein thrombosis/
- 28 exp Venous Thromboembolism/
- 29 exp 'lung embolism'/
- 30 Thrombophlebitis/
- 31 (PE or DVT or VTE).mp.
- 32 ((Pulmon\$ or vein or venous or lung) adj (Emboli\$ or thromb\$)).mp.
- 33 (thrombus\* or thrombotic\* or thrombolic\* or thromboemboli\* or thrombos\* or embol\*).mp.
- 34 (((deep or thromb\* or stasis) adj2 (vein\* or venous)) or (blood flow stasis or blood clot)).mp.
- 35 or/27-34
- 36 exp Thrombophilia/
- 37 Activated Protein C Resistance/
- 38 Antithrombin III Deficiency/
- 39 blood clotting factor 5 deficiency/
- 40 protein c deficiency/
- 41 Protein S Deficiency/
- 42 exp Factor VIII/ or blood clotting factor 8/
- 43 exp Antibodies, Antiphospholipid/

44 phospholipid antibody/  
45 cardiolipin antibody/  
46 prothrombin/  
47 beta 2-Glycoprotein I/  
48 lupus anticoagulant/  
49 "Methylenetetrahydrofolate Reductase (NADPH2)"/  
50 ((prothrombin adj (G20210A or "20210")) or (protein C adj (deficienc\$ or resistance)) or protein S  
deficienc\$ or ((antithrombin or anti thrombin) adj deficienc\$) or (factor adj (VIII or V leiden or II leiden or II  
G20210A)) or (lupus adj (coagulation inhibitor or anticoagulant)) or (antibod\$ adj1 (antiphospholipid or  
anticardiolipin)) or at III or apc resistance or anti-beta2 glycoprotein or Methylenetetrahydrofolate reductase  
or mthfr).ti,ab,kw.  
51 (thrombophil\* or hypercoagul\*).mp.  
52 or/36-51  
53 \*contraceptives, oral/  
54 \*oral contraceptive agent/  
55 \*hormone replacement therapy/  
56 \*estrogen replacement therapy/  
57 \*hormone substitution/  
58 \*estrogen therapy/  
59 ((hormone or estrogen or oestrogen) adj1 (replacement or therap\* or substitut\*)).mp.  
60 (oral adj1 (contraceptive\* or contraception)).mp.  
61 \*Hemophilia A/ or \*Hemophilia B/  
62 or/53-61  
63 random\*.ti,ab.  
64 trial.ti,ab.  
65 factorial\*.ti,ab.  
66 (crossover\* or cross over\*).ti,ab.  
67 ((doubl\* or singl\*) adj blind\*).ti,ab.  
68 (assign\* or allocat\* or volunteer\* or placebo\*).ti,ab.  
69 placebo.ab.  
70 crossover procedure/  
71 single blind procedure/  
72 randomized controlled trial/  
73 double blind procedure/  
74 or/63-73  
75 animals/ not humans/  
76 nonhuman/  
77 exp Animal Experiment/  
78 exp Experimental Animal/  
79 animal model/  
80 exp Rodent/  
81 (rat or rats or mouse or mice).ti.  
82 or/75-81  
83 74 not 82  
84 62 and (52 or 35)  
85 (84 and 11) not 82  
86 84 and 83  
87 (84 and 26) not 82  
88 85 or 86 or 87

Database: Cochrane Library

Date most recent search: 05-JUN-2018

**Search Strategy: search terms**

- #1 MeSH descriptor: [Venous Thrombosis] explode all trees
- #2 MeSH descriptor: [Thromboembolism] explode all trees
- #3 MeSH descriptor: [Venous Thromboembolism] explode all trees
- #4 MeSH descriptor: [Pulmonary Embolism] explode all trees
- #5 MeSH descriptor: [Thrombophlebitis] this term only
- #6 (DVT or VTE or PE)
- #7 ((Pulmon\* or vein or venous or lung) near (Emboli\* or thromb\*))
- #8 (Thrombus\* or thrombotic\* or thrombolic\* or thromboemboli\* or thrombos\* or embol\*)
- #9 (((deep or thromb\* or stasis) near/2 (vein\* or venous)) or (blood flow stasis or blood clot))
- #10 #1 or #2 or #3 or #4 or #5 or #6 or #7 or #8 or #9
- #11 MeSH descriptor: [Thrombophilia] explode all trees
- #12 MeSH descriptor: [Factor VIII] explode all trees
- #13 MeSH descriptor: [Antibodies, Antiphospholipid] explode all trees
- #14 MeSH descriptor: [Prothrombin] this term only
- #15 MeSH descriptor: [beta 2-Glycoprotein I] this term only
- #16 MeSH descriptor: [Methylenetetrahydrofolate Reductase (NADPH2)] this term only
- #17 MeSH descriptor: [Activated Protein C Resistance] this term only
- #18 MeSH descriptor: [Antithrombin III Deficiency] this term only
- #19 MeSH descriptor: [Protein C Deficiency] this term only
- #20 MeSH descriptor: [Protein S Deficiency] this term only
- #21 (thrombophil\* or hypercoagul\*)
- #22 ((prothrombin near (G20210A or "20210")) or (protein C near (deficienc\* or resistance)) or protein S deficienc\* or ((antithrombin or anti thrombin) near deficienc\*) or (factor near (VIII or V leiden or II leiden or II G20210A)) or (lupus near (coagulation inhibitor or anticoagulant)) or (antibod\* near (antiphospholipid or anticardiolipin)) or at III or apc resistance or anti-beta2 glycoprotein or Methylenetetrahydrofolate reductase or mthfr):ti,ab,kw
- #23 #11 or #12 or #13 or #14 or #15 or #16 or #17 or #18 or #19 or #20 or #21 or #22
- #24 #11 or #12 or #13 or #14 or #15 or #16 or #17 or #18 or #19 or #20 or #21
- #25 MeSH descriptor: [Contraceptives, Oral] explode all trees
- #26 MeSH descriptor: [Hormone Replacement Therapy] explode all trees
- #27 (oral near/1 (contraceptive\* or contraception))
- #28 ((hormone replacement or estrogen or oestrogen) near/1 therap\*)
- #29 ((oestrogen or estrogen) near/1 replacement)
- #30 #25 or #26 or #27 or #28 or #29
- #31 #24 and not #30
- #32 #30 and (#10 or #23)
